# Supplementary material for: Graphene enhances photosynthesis and the antioxidative defense system and alleviates salinity and alkalinity stresses in alfalfa (Medicago sativa L.) by regulating gene expression
Source: Royal Society of Chemistry journal article supplement (doi:10.1039/d1en00257k), 2021-01-01
Supplement: d1en00257k3.xlsx [file d1en00257k3.xlsx]

## Sheet: Table_S8
Table S8†. The DEGs of photosynthesis pathway in response to graphene treatment.
W_CK_vs_W_L (C1)
Component	#ID	T01_Count	T02_Count	T03_Count	T04_Count	T05_Count	T06_Count	T01_FPKM	T02_FPKM	T03_FPKM	T04_FPKM	T05_FPKM	T06_FPKM	FDR	log2FC	regulated	COG_class	COG_class_annotation	GO_annotation	KEGG_annotation	KEGG_pathway	KOG_class	KOG_class_annotation	Pfam_annotation	Swissprot_annotation	eggNOG_class	eggNOG_class_annotation	nr_annotation
PsbA	F01_transcript/14235	4152	1585	2171	63	16	62	290.75	110.74	150.35	3.69	1.22	4.48	1.79199e-06	-5.97689	down	--	--	Molecular Function: iron ion binding (GO:0005506);; Cellular Component: photosystem II (GO:0009523);; Cellular Component: chloroplast thylakoid membrane (GO:0009535);; Biological Process: response to herbicide (GO:0009635);; Biological Process: photosynthetic electron transport in photosystem II (GO:0009772);; Molecular Function: oxygen evolving activity (GO:0010242);; Cellular Component: integra…	K02703|6.08668e-143|mtr:MTR_7g021750|K02703 photosystem II P680 reaction center D1 protein [EC:1.10.3.9] | (RefSeq) photosystem II Q(B) protein	ko00195:Photosynthesis	--	--	Photosynthetic reaction centre protein	Photosystem II protein D1 {ECO:0000255|HAMAP-Rule:MF_01379} (Precursor) OS=Medicago sativa (Alfalfa) PE=3 SV=1	C	Energy production and conversion	photosystem II protein D1 (chloroplast) [Macadamia integrifolia]
PsbB	F01_transcript/1789	486	281	312	78	10	49	10.12	5.84	6.43	1.36	0.23	1.05	2.01701e-06	-3.16465	down	[C]	Energy production and conversion	Cellular Component: photosystem II (GO:0009523);; Cellular Component: chloroplast thylakoid membrane (GO:0009535);; Biological Process: photosynthetic electron transport in photosystem II (GO:0009772);; Cellular Component: integral component of membrane (GO:0016021);; Molecular Function: chlorophyll binding (GO:0016168);; Biological Process: protein-chromophore linkage (GO:0018298);; Molecular Fu…	K02704|0|mtr:MTR_4g051370|K02704 photosystem II CP47 chlorophyll apoprotein | (RefSeq) photosystem II CP47 chlorophyll A apoprotein	ko00195:Photosynthesis	--	--	Photosystem II protein;; Cytochrome b/b6/petB;; Cytochrome b(N-terminal)/b6/petB;; Photosystem II 10 kDa phosphoprotein	Photosystem II CP47 reaction center protein {ECO:0000255|HAMAP-Rule:MF_01495} OS=Panax ginseng (Korean ginseng) PE=3 SV=1	S	Function unknown	Photosystem II CP47 chlorophyll apoprotein [Medicago truncatula]
	F01_transcript/186	2982	1464	1848	291	313	366	42.22	20.71	25.86	3.44	4.49	5.23	0.000121507	-2.828	down	[C]	Energy production and conversion	Cellular Component: photosystem II (GO:0009523);; Cellular Component: chloroplast thylakoid membrane (GO:0009535);; Biological Process: photosynthetic electron transport in photosystem II (GO:0009772);; Cellular Component: integral component of membrane (GO:0016021);; Molecular Function: chlorophyll binding (GO:0016168);; Biological Process: protein-chromophore linkage (GO:0018298);; Molecular Fu…	K02704|0|mtr:MTR_4g051370|K02704 photosystem II CP47 chlorophyll apoprotein | (RefSeq) photosystem II CP47 chlorophyll A apoprotein	ko00195:Photosynthesis	--	--	Photosystem II protein;; Cytochrome b/b6/petB;; Cytochrome b(N-terminal)/b6/petB;; Cytochrome b(C-terminal)/b6/petD;; Photosystem II 10 kDa phosphoprotein	Photosystem II CP47 reaction center protein {ECO:0000255|HAMAP-Rule:MF_01495} OS=Cicer arietinum (Chickpea) PE=3 SV=1	S	Function unknown	Photosystem II CP47 chlorophyll apoprotein [Medicago truncatula]
	F01_transcript/2102	2254	985	1340	293	405	372	48.72	21.27	28.64	5.28	8.88	8.13	0.00392879	-2.22576	down	[C]	Energy production and conversion	Cellular Component: photosystem II (GO:0009523);; Cellular Component: chloroplast thylakoid membrane (GO:0009535);; Biological Process: photosynthetic electron transport in photosystem II (GO:0009772);; Cellular Component: integral component of membrane (GO:0016021);; Molecular Function: chlorophyll binding (GO:0016168);; Biological Process: protein-chromophore linkage (GO:0018298);; Molecular Fu…	K02704|0|mtr:MTR_4g051370|K02704 photosystem II CP47 chlorophyll apoprotein | (RefSeq) photosystem II CP47 chlorophyll A apoprotein	ko00195:Photosynthesis	--	--	Photosystem II protein;; Cytochrome b/b6/petB;; Cytochrome b(N-terminal)/b6/petB;; Photosystem II 10 kDa phosphoprotein	Photosystem II CP47 reaction center protein {ECO:0000255|HAMAP-Rule:MF_01495} OS=Cicer arietinum (Chickpea) PE=3 SV=1	S	Function unknown	Photosystem II CP47 chlorophyll apoprotein [Medicago truncatula]
PetB	F01_transcript/12457	224	52	108	10	4	13	11.93	2.78	5.7	0.45	0.22	0.73	0.00777166	-3.98806	down	[C]	Energy production and conversion	Molecular Function: iron ion binding (GO:0005506);; Cellular Component: cytochrome b6f complex (GO:0009512);; Cellular Component: chloroplast thylakoid membrane (GO:0009535);; Cellular Component: integral component of membrane (GO:0016021);; Molecular Function: oxidoreductase activity (GO:0016491);; Biological Process: photosynthesis, light reaction (GO:0019684);; Molecular Function: heme binding…	K02635|4.45022e-109|cam:6797553|K02635 cytochrome b6 | (RefSeq) petB, CiarC_p049; cytochrome b6	ko00195:Photosynthesis	[C]	Energy production and conversion	Cytochrome b(C-terminal)/b6/petD;; Cytochrome b/b6/petB;; Domain of unknown function (DUF4405)	Cytochrome b6 {ECO:0000255|HAMAP-Rule:MF_00633} OS=Oenothera elata subsp. hookeri (Hooker&apos;s evening primrose) PE=3 SV=2	C	Energy production and conversion	unknown [Medicago truncatula]
	F01_transcript/413	374	163	211	29	41	87	5.88	2.56	3.28	0.39	0.66	1.38	0.00458928	-2.35435	down	[C]	Energy production and conversion	Molecular Function: iron ion binding (GO:0005506);; Cellular Component: chloroplast thylakoid membrane (GO:0009535);; Biological Process: photosynthesis (GO:0015979);; Cellular Component: integral component of membrane (GO:0016021);; Molecular Function: oxidoreductase activity (GO:0016491);; Molecular Function: heme binding (GO:0020037);; Biological Process: respiratory electron transport chain (…	K02635|3.69234e-141|cmo:103504414|K02635 cytochrome b6 | (RefSeq) cytochrome b6	ko00195:Photosynthesis	[C]	Energy production and conversion	Cytochrome b/b6/petB;; Cytochrome b(N-terminal)/b6/petB;; Photosystem II protein;; Cytochrome b(C-terminal)/b6/petD;; Photosystem II 10 kDa phosphoprotein	Cytochrome b6 {ECO:0000255|HAMAP-Rule:MF_00633} OS=Oenothera elata subsp. hookeri (Hooker&apos;s evening primrose) PE=3 SV=2	C	Energy production and conversion	PREDICTED: LOW QUALITY PROTEIN: cytochrome b6, partial [Cucumis melo]
PetD	F01_transcript/13060	146	74	63	0	12	4	8.46	4.28	3.65	0	0.75	0.25	9.42671e-05	-4.21921	down	[C]	Energy production and conversion	Cellular Component: mitochondrion (GO:0005739);; Cellular Component: chloroplast thylakoid membrane (GO:0009535);; Biological Process: photosynthetic electron transport chain (GO:0009767);; Cellular Component: integral component of membrane (GO:0016021);; Molecular Function: oxidoreductase activity (GO:0016491);; Molecular Function: electron transporter, transferring electrons within the cyclic e…	K02637|1.06491e-117|pda:8890542|K02637 cytochrome b6-f complex subunit 4 | (RefSeq) petD, PhdaC_p053; cytochrome b6-f complex subunit IV	ko00195:Photosynthesis	[C]	Energy production and conversion	Cytochrome b(C-terminal)/b6/petD	Cytochrome b6-f complex subunit 4 {ECO:0000255|HAMAP-Rule:MF_01344} OS=Populus alba (White poplar) PE=3 SV=1	C	Energy production and conversion	cytochrome b6-f complex subunit IV [Phoenix dactylifera]
PsbP	F01_transcript/15420	3030	3276	3352	26334	22432	21587	263.35	283.94	288.17	1913.55	2013.13	1937.08	1.44783e-141	2.73874	up	--	--	Molecular Function: calcium ion binding (GO:0005509);; Cellular Component: chloroplast thylakoid membrane (GO:0009535);; Cellular Component: photosystem II oxygen evolving complex (GO:0009654);; Biological Process: photosynthesis (GO:0015979);; Cellular Component: extrinsic component of membrane (GO:0019898);;	K02717|1.90406e-150|cam:101514916|K02717 photosystem II oxygen-evolving enhancer protein 2 | (RefSeq) oxygen-evolving enhancer protein 2, chloroplastic	ko00195:Photosynthesis	--	--	PsbP	Oxygen-evolving enhancer protein 2, chloroplastic (Precursor) GN=PSBP OS=Pisum sativum (Garden pea) PE=1 SV=1	S	Function unknown	unknown [Medicago truncatula]
	F01_transcript/21099	1397	1670	1770	512	287	369	1213.79	1444.31	1498.24	383.56	299.77	391.43	2.92499e-61	-2.18682	down	--	--	Molecular Function: calcium ion binding (GO:0005509);; Cellular Component: chloroplast thylakoid membrane (GO:0009535);; Cellular Component: photosystem II oxygen evolving complex (GO:0009654);; Biological Process: photosynthesis (GO:0015979);; Cellular Component: extrinsic component of membrane (GO:0019898);;	K02717|2.83282e-44|cam:101514916|K02717 photosystem II oxygen-evolving enhancer protein 2 | (RefSeq) oxygen-evolving enhancer protein 2, chloroplastic	ko00195:Photosynthesis	--	--	--	Oxygen-evolving enhancer protein 2, chloroplastic (Precursor) GN=PSBP OS=Pisum sativum (Garden pea) PE=1 SV=1	S	Function unknown	oxygen-evolving enhancer protein 2-1 [Medicago truncatula]
PsbQ	F01_transcript/17850	7	2	11	26	43	36	1.14	0.34	1.75	3.23	6.71	5.71	5.28263e-05	2.28219	up	--	--	Molecular Function: calcium ion binding (GO:0005509);; Cellular Component: photosystem II oxygen evolving complex (GO:0009654);; Biological Process: photosynthesis (GO:0015979);; Cellular Component: extrinsic component of membrane (GO:0019898);;	K08901|2.20564e-71|cam:101513108|K08901 photosystem II oxygen-evolving enhancer protein 3 | (RefSeq) photosynthetic NDH subunit of lumenal location 2, chloroplastic	ko00195:Photosynthesis	--	--	Oxygen evolving enhancer protein 3 (PsbQ)	PsbQ-like protein 1, chloroplastic (Precursor) GN=F7A19.23 OS=Arabidopsis thaliana (Mouse-ear cress) PE=1 SV=1	S	Function unknown	PREDICTED: LOW QUALITY PROTEIN: psbQ-like protein 1, chloroplastic-like [Cicer arietinum]
	F01_transcript/21133	40	52	56	418	178	299	31.6	40.45	42.67	279.55	164.78	280.61	2.2586e-06	2.4563	up	--	--	Molecular Function: calcium ion binding (GO:0005509);; Cellular Component: photosystem II oxygen evolving complex (GO:0009654);; Biological Process: photosynthesis (GO:0015979);; Cellular Component: extrinsic component of membrane (GO:0019898);;	K08901|2.82281e-34|cam:101495316|K08901 photosystem II oxygen-evolving enhancer protein 3 | (RefSeq) oxygen-evolving enhancer protein 3, chloroplastic-like	ko00195:Photosynthesis	--	--	Oxygen evolving enhancer protein 3 (PsbQ)	Oxygen-evolving enhancer protein 3, chloroplastic (Precursor) GN=PSBQ OS=Onobrychis viciifolia (Common sainfoin) PE=2 SV=1	S	Function unknown	unknown [Medicago truncatula]
	F01_transcript/8383	330	359	386	168	110	173	11.79	12.82	13.62	5.02	4	6.29	1.33542e-18	-1.37521	down	--	--	Molecular Function: calcium ion binding (GO:0005509);; Cellular Component: photosystem II oxygen evolving complex (GO:0009654);; Biological Process: photosynthesis (GO:0015979);; Cellular Component: extrinsic component of membrane (GO:0019898);;	K08901|1.21548e-44|cam:101495316|K08901 photosystem II oxygen-evolving enhancer protein 3 | (RefSeq) oxygen-evolving enhancer protein 3, chloroplastic-like	ko00195:Photosynthesis	--	--	Oxygen evolving enhancer protein 3 (PsbQ)	Oxygen-evolving enhancer protein 3-2, chloroplastic (Precursor) GN=C17L7.100 OS=Arabidopsis thaliana (Mouse-ear cress) PE=1 SV=2	S	Function unknown	oxygen-evolving enhancer protein [Medicago truncatula]
PsbR	F01_transcript/17125	9314	10242	10252	35414	22732	27235	1193.42	1307.76	1300.23	3804.95	3045.4	3656.87	1.17058e-14	1.38394	up	--	--	Cellular Component: photosystem II oxygen evolving complex (GO:0009654);; Biological Process: photosynthesis (GO:0015979);; Cellular Component: integral component of membrane (GO:0016021);;	K03541|1.38076e-71|mtr:MTR_2g064650|K03541 photosystem II 10kDa protein | (RefSeq) photosystem II 10 kDa proteinPsbR protein	ko00195:Photosynthesis	--	--	Photosystem II 10 kDa polypeptide PsbR	Photosystem II 10 kDa polypeptide, chloroplastic (Precursor) GN=PSBR OS=Solanum tuberosum (Potato) PE=2 SV=1	S	Function unknown	Photosystem II 10 kDa polypeptide [Medicago truncatula]
	F01_transcript/18244	5190	5693	5486	34318	19059	26506	1003.61	1095.48	1050.99	5588.77	3929.76	5498.59	7.50479e-12	2.14944	up	--	--	Cellular Component: photosystem II oxygen evolving complex (GO:0009654);; Biological Process: photosynthesis (GO:0015979);; Cellular Component: integral component of membrane (GO:0016021);;	K03541|1.65183e-70|mtr:MTR_2g064650|K03541 photosystem II 10kDa protein | (RefSeq) photosystem II 10 kDa proteinPsbR protein	ko00195:Photosynthesis	--	--	Photosystem II 10 kDa polypeptide PsbR	Photosystem II 10 kDa polypeptide, chloroplastic (Precursor) GN=PSBR OS=Solanum tuberosum (Potato) PE=2 SV=1	S	Function unknown	Photosystem II 10 kDa polypeptide [Medicago truncatula]
	F01_transcript/18451	4946	5626	5643	555	443	508	870.4	985.68	983.66	82.17	82.85	95.37	0	-3.5508	down	--	--	Cellular Component: photosystem II oxygen evolving complex (GO:0009654);; Biological Process: photosynthesis (GO:0015979);; Cellular Component: integral component of membrane (GO:0016021);;	K03541|2.76756e-70|mtr:MTR_2g064650|K03541 photosystem II 10kDa protein | (RefSeq) photosystem II 10 kDa proteinPsbR protein	ko00195:Photosynthesis	--	--	Photosystem II 10 kDa polypeptide PsbR	Photosystem II 10 kDa polypeptide, chloroplastic (Precursor) GN=PSBR OS=Solanum tuberosum (Potato) PE=2 SV=1	S	Function unknown	Photosystem II 10 kDa polypeptide [Medicago truncatula]
PsbS	F01_transcript/14964	1675	1854	1972	6253	4590	5280	131.44	145.12	153.08	409.99	370.99	426.47	2.80372e-35	1.42412	up	--	--	Cellular Component: integral component of membrane (GO:0016021);;	K03542|1.02465e-135|mtr:MTR_3g088040|K03542 photosystem II 22kDa protein | (RefSeq) light-harvesting complex I chlorophyll A/B-binding protein	ko00195:Photosynthesis	--	--	Chlorophyll A-B binding protein	Photosystem II 22 kDa protein, chloroplastic (Precursor) GN=PSBS OS=Spinacia oleracea (Spinach) PE=1 SV=1	I	Lipid transport and metabolism	Photosystem II 22 kDa protein [Medicago truncatula]
PsbW	F01_transcript/18528	369	292	215	691	649	725	66.74	52.47	38.54	104.95	124.37	139.71	8.43761e-07	1.10842	up	--	--	Cellular Component: chloroplast (GO:0009507);; Cellular Component: photosystem II (GO:0009523);; Biological Process: photosynthesis (GO:0015979);; Cellular Component: integral component of membrane (GO:0016021);;	K02721|2.53923e-43|cam:101505752|K02721 photosystem II PsbW protein | (RefSeq) photosystem II reaction center W protein, chloroplastic-like	ko00195:Photosynthesis	--	--	Photosystem II reaction centre W protein (PsbW)	Photosystem II reaction center W protein, chloroplastic (Precursor) GN=psbW OS=Spinacia oleracea (Spinach) PE=1 SV=1	S	Function unknown	unknown [Medicago truncatula]
PetE	F01_transcript/17953	3465	3743	3683	51378	32392	39634	590.58	635.12	621.58	7362.27	5845.37	7186.26	3.09485e-39	3.36696	up	[C]	Energy production and conversion	Molecular Function: copper ion binding (GO:0005507);; Molecular Function: electron carrier activity (GO:0009055);; Cellular Component: chloroplast thylakoid membrane (GO:0009535);; Cellular Component: integral component of membrane (GO:0016021);; Biological Process: oxidation-reduction process (GO:0055114);;	K02638|4.9974e-94|mtr:MTR_3g114850|K02638 plastocyanin | (RefSeq) plastocyanin	ko00195:Photosynthesis	--	--	Copper binding proteins, plastocyanin/azurin family	Plastocyanin, chloroplastic (Precursor) GN=PETE OS=Pisum sativum (Garden pea) PE=4 SV=1	C	Energy production and conversion	Plastocyanin [Medicago truncatula]
PetF	F01_transcript/21206	104	122	148	541	330	345	96.19	112.08	132.11	428.36	365.59	387.78	6.27041e-10	1.56214	up	[C]	Energy production and conversion	Biological Process: ferredoxin metabolic process (GO:0006124);; Molecular Function: ferrous iron binding (GO:0008198);; Molecular Function: electron carrier activity (GO:0009055);; Cellular Component: chloroplast (GO:0009507);; Biological Process: electron transport chain (GO:0022900);; Molecular Function: 2 iron, 2 sulfur cluster binding (GO:0051537);;	K02639|4.04226e-20|mtr:MTR_2g006290|K02639 ferredoxin | (RefSeq) 2Fe-2S ferredoxin superfamily protein	ko00195:Photosynthesis	--	--	--	Ferredoxin OS=Medicago sativa (Alfalfa) PE=1 SV=1	C	Energy production and conversion	RecName: Full=Ferredoxin [Medicago sativa]
PetH	F01_transcript/13104	0	8	12	224	140	306	0	0.5	0.74	10.83	8.32	18.11	1.18938e-08	4.99531	up	[P]	Inorganic ion transport and metabolism	Molecular Function: ferredoxin-NADP+ reductase activity (GO:0004324);; Molecular Function: protein binding (GO:0005515);; Molecular Function: poly(U) RNA binding (GO:0008266);; Cellular Component: chloroplast thylakoid membrane (GO:0009535);; Cellular Component: chloroplast stroma (GO:0009570);; Biological Process: photosynthetic electron transport chain (GO:0009767);; Cellular Component: chlorop…	K02641|0|mtr:MTR_5g022300|K02641 ferredoxin--NADP+ reductase [EC:1.18.1.2] | (RefSeq) leaf ferredoxin-NADP reductase	ko00195:Photosynthesis	[C]	Energy production and conversion	Oxidoreductase NAD-binding domain;; Oxidoreductase FAD-binding domain	Ferredoxin--NADP reductase, chloroplastic (Precursor) GN=PETH OS=Vicia faba (Broad bean) PE=2 SV=1	P	Inorganic ion transport and metabolism	Ferredoxin-NADP reductase [Medicago truncatula]
Psb27	F01_transcript/17718	109	177	143	1012	832	736	16.65	26.82	21.61	129.16	133.25	118.33	1.09537e-92	2.46739	up	--	--	Cellular Component: chloroplast thylakoid lumen (GO:0009543);; Biological Process: photosystem II repair (GO:0010206);; Biological Process: photosystem II assembly (GO:0010207);;	K08902|4.7607e-76|cam:101500783|K08902 photosystem II Psb27 protein | (RefSeq) photosystem II repair protein PSB27-H1, chloroplastic	ko00195:Photosynthesis	--	--	Photosystem II Pbs27	Photosystem II repair protein PSB27-H1, chloroplastic (Precursor) OS=Arabidopsis thaliana (Mouse-ear cress) PE=1 SV=1	G	Carbohydrate transport and metabolism	photosystem II Pbs27 protein [Medicago truncatula]
PsaA	F01_transcript/13	5489	2701	3295	1098	1064	1289	58.35	28.68	34.61	9.71	11.43	13.79	0.00476911	-1.86927	down	[M]	Cell wall/membrane/envelope biogenesis	Molecular Function: magnesium ion binding (GO:0000287);; Molecular Function: electron carrier activity (GO:0009055);; Cellular Component: photosystem I (GO:0009522);; Cellular Component: chloroplast thylakoid membrane (GO:0009535);; Biological Process: photosynthesis (GO:0015979);; Cellular Component: integral component of membrane (GO:0016021);; Molecular Function: chlorophyll binding (GO:001616…	K02689|0|mtr:MetrCp066|K02689 photosystem I P700 chlorophyll a apoprotein A1 | (RefSeq) psaA; photosystem I P700 chlorophyll a apoprotein A1	ko00195:Photosynthesis	--	--	Photosystem I psaA/psaB protein;; Photosystem I psaA/psaB protein;; Tetratricopeptide repeat;; Tetratricopeptide repeat;; Tetratricopeptide repeat;; Tetratricopeptide repeat;; TPR repeat;; Tetratricopeptide repeat;; Tetratricopeptide repeat;; Tetratricopeptide repeat;; Ribosomal protein S14p/S29e	Photosystem I P700 chlorophyll a apoprotein A1 {ECO:0000255|HAMAP-Rule:MF_00458} OS=Pisum sativum (Garden pea) PE=1 SV=2	C	Energy production and conversion	photosystem I P700 chlorophyll A apoprotein A2 [Medicago truncatula]
	F01_transcript/333	4026	1331	1880	0	177	0	62.17	20.55	28.69	0	2.78	0.01	9.01534e-05	-5.44497	down	[M]	Cell wall/membrane/envelope biogenesis	Molecular Function: magnesium ion binding (GO:0000287);; Molecular Function: electron carrier activity (GO:0009055);; Cellular Component: photosystem I (GO:0009522);; Cellular Component: chloroplast thylakoid membrane (GO:0009535);; Biological Process: photosynthesis (GO:0015979);; Cellular Component: integral component of membrane (GO:0016021);; Molecular Function: chlorophyll binding (GO:001616…	K02689|0|mtr:MetrCp066|K02689 photosystem I P700 chlorophyll a apoprotein A1 | (RefSeq) psaA; photosystem I P700 chlorophyll a apoprotein A1	ko00195:Photosynthesis	--	--	Photosystem I psaA/psaB protein;; Photosystem I psaA/psaB protein;; Photosystem I psaA/psaB protein;; Ribosomal protein S14p/S29e	Photosystem I P700 chlorophyll a apoprotein A1 {ECO:0000255|HAMAP-Rule:MF_00458} GN=CsCp034 OS=Cucumis sativus (Cucumber) PE=3 SV=1	C	Energy production and conversion	photosystem I P700 apoprotein A1 [Medicago truncatula]
PsaB	F01_transcript/6948	33	20	46	243	250	292	1.06	0.64	1.47	6.48	8.14	9.47	2.97581e-19	2.87045	up	[M]	Cell wall/membrane/envelope biogenesis	Molecular Function: magnesium ion binding (GO:0000287);; Molecular Function: electron carrier activity (GO:0009055);; Cellular Component: photosystem I (GO:0009522);; Cellular Component: chloroplast thylakoid membrane (GO:0009535);; Biological Process: photosynthesis (GO:0015979);; Cellular Component: integral component of membrane (GO:0016021);; Molecular Function: chlorophyll binding (GO:001616…	K02690|0|mtr:MTR_3g035600|K02690 photosystem I P700 chlorophyll a apoprotein A2 | (RefSeq) photosystem I P700 chlorophyll A apoprotein A2	ko00195:Photosynthesis	--	--	Photosystem I psaA/psaB protein;; Photosystem I psaA/psaB protein;; Ribosomal protein S14p/S29e	Photosystem I P700 chlorophyll a apoprotein A2 {ECO:0000255|HAMAP-Rule:MF_00482} OS=Oenothera elata subsp. hookeri (Hooker&apos;s evening primrose) PE=3 SV=2	C	Energy production and conversion	photosystem I P700 chlorophyll A apoprotein A2 [Medicago truncatula]
	F01_transcript/5145	213	179	177	98	63	113	5.98	5.03	4.92	2.3	1.8	3.21	8.67436e-06	-1.18075	down	[M]	Cell wall/membrane/envelope biogenesis	Molecular Function: magnesium ion binding (GO:0000287);; Molecular Function: electron carrier activity (GO:0009055);; Cellular Component: photosystem I (GO:0009522);; Cellular Component: chloroplast thylakoid membrane (GO:0009535);; Biological Process: photosynthesis (GO:0015979);; Cellular Component: integral component of membrane (GO:0016021);; Molecular Function: chlorophyll binding (GO:001616…	K02690|0|mtr:MTR_3g035600|K02690 photosystem I P700 chlorophyll a apoprotein A2 | (RefSeq) photosystem I P700 chlorophyll A apoprotein A2	ko00195:Photosynthesis	--	--	Photosystem I psaA/psaB protein;; Ribosomal protein S14p/S29e;; Photosystem I psaA/psaB protein	Photosystem I P700 chlorophyll a apoprotein A2 {ECO:0000255|HAMAP-Rule:MF_00482} OS=Lotus japonicus (Lotus corniculatus var. japonicus) PE=3 SV=1	C	Energy production and conversion	photosystem I P700 chlorophyll A apoprotein A2 [Medicago truncatula]
PsaF	F01_transcript/15536	10333	11979	11291	30567	31460	24111	908.86	1050.91	982.57	2248.57	2858.87	2190.98	9.14356e-15	1.23664	up	--	--	Cellular Component: plastid (GO:0009536);; Cellular Component: photosystem I reaction center (GO:0009538);; Biological Process: photosynthesis (GO:0015979);; Cellular Component: integral component of membrane (GO:0016021);;	K02694|2.05773e-94|cam:101506661|K02694 photosystem I subunit III | (RefSeq) photosystem I reaction center subunit III, chloroplastic	ko00195:Photosynthesis	--	--	Photosystem I reaction centre subunit III	Photosystem I reaction center subunit III, chloroplastic (Precursor) GN=PSAF OS=Flaveria trinervia (Clustered yellowtops) PE=2 SV=1	S	Function unknown	unknown [Medicago truncatula]
	F01_transcript/16432	4778	5386	5125	39110	35586	33395	509.06	572.14	540.37	3489.37	3938.99	3700.26	5.10696e-99	2.69909	up	--	--	Cellular Component: plastid (GO:0009536);; Cellular Component: photosystem I reaction center (GO:0009538);; Biological Process: photosynthesis (GO:0015979);; Cellular Component: integral component of membrane (GO:0016021);;	K02694|5.22106e-127|cam:101506661|K02694 photosystem I subunit III | (RefSeq) photosystem I reaction center subunit III, chloroplastic	ko00195:Photosynthesis	--	--	Photosystem I reaction centre subunit III	Photosystem I reaction center subunit III, chloroplastic (Precursor) GN=PSAF OS=Arabidopsis thaliana (Mouse-ear cress) PE=1 SV=1	S	Function unknown	unknown [Medicago truncatula]
	F01_transcript/16057	3863	4145	3966	1062	1303	930	370.63	396.56	376.51	85.28	129.55	92.49	2.05939e-118	-1.97791	down	--	--	Cellular Component: plastid (GO:0009536);; Cellular Component: photosystem I reaction center (GO:0009538);; Biological Process: photosynthesis (GO:0015979);; Cellular Component: integral component of membrane (GO:0016021);;	K02694|5.71879e-95|cam:101506661|K02694 photosystem I subunit III | (RefSeq) photosystem I reaction center subunit III, chloroplastic	ko00195:Photosynthesis	--	--	Photosystem I reaction centre subunit III	Photosystem I reaction center subunit III, chloroplastic (Precursor) GN=PSAF OS=Flaveria trinervia (Clustered yellowtops) PE=2 SV=1	S	Function unknown	unknown [Medicago truncatula]
	F01_transcript/16943	14514	16158	15938	8593	7231	6732	1694.76	1880.58	1841.88	840.78	879.93	820.45	1.68542e-31	-1.17444	down	--	--	Cellular Component: plastid (GO:0009536);; Cellular Component: photosystem I reaction center (GO:0009538);; Biological Process: photosynthesis (GO:0015979);; Cellular Component: integral component of membrane (GO:0016021);;	K02694|3.30479e-128|cam:101506661|K02694 photosystem I subunit III | (RefSeq) photosystem I reaction center subunit III, chloroplastic	ko00195:Photosynthesis	--	--	Photosystem I reaction centre subunit III	Photosystem I reaction center subunit III, chloroplastic (Precursor) GN=PSAF OS=Arabidopsis thaliana (Mouse-ear cress) PE=1 SV=1	S	Function unknown	unknown [Medicago truncatula]
beta	F01_transcript/5015	193	135	125	28	12	20	5.57	3.89	3.56	0.69	0.38	0.6	8.00105e-09	-3.07712	down	[C]	Energy production and conversion	Molecular Function: ATP binding (GO:0005524);; Cellular Component: plasma membrane (GO:0005886);; Cellular Component: chloroplast thylakoid membrane (GO:0009535);; Biological Process: ATP synthesis coupled proton transport (GO:0015986);; Biological Process: ATP hydrolysis coupled proton transport (GO:0015991);; Cellular Component: integral component of membrane (GO:0016021);; Cellular Component: …	K02112|0|mtr:MetrCp073|K02112 F-type H+-transporting ATPase subunit beta [EC:3.6.3.14] | (RefSeq) atpB; ATP synthase CF1 beta subunit	ko00190:Oxidative phosphorylation;ko00195:Photosynthesis	[C]	Energy production and conversion	ATP synthase alpha/beta family, nucleotide-binding domain;; ATP synthase alpha/beta family, beta-barrel domain;; ATPase family associated with various cellular activities (AAA);; ATP synthase, Delta/Epsilon chain, beta-sandwich domain;; ATP synthase, Delta/Epsilon chain, long alpha-helix domain	ATP synthase subunit beta, chloroplastic {ECO:0000255|HAMAP-Rule:MF_01347} OS=Medicago sativa (Alfalfa) PE=3 SV=1	C	Energy production and conversion	RecName: Full=ATP synthase subunit beta, chloroplastic; AltName: Full=ATP synthase F1 sector subunit beta; AltName: Full=F-ATPase subunit beta (chloroplast) [Medicago sativa]
	F01_transcript/8045	936	536	589	94	93	107	32.02	18.33	19.93	2.69	3.24	3.72	4.33988e-06	-2.94103	down	[C]	Energy production and conversion	Molecular Function: ATP binding (GO:0005524);; Cellular Component: plasma membrane (GO:0005886);; Cellular Component: chloroplast thylakoid membrane (GO:0009535);; Biological Process: ATP synthesis coupled proton transport (GO:0015986);; Biological Process: ATP hydrolysis coupled proton transport (GO:0015991);; Cellular Component: integral component of membrane (GO:0016021);; Cellular Component: …	K02112|0|mtr:MetrCp073|K02112 F-type H+-transporting ATPase subunit beta [EC:3.6.3.14] | (RefSeq) atpB; ATP synthase CF1 beta subunit	ko00190:Oxidative phosphorylation;ko00195:Photosynthesis	[C]	Energy production and conversion	ATP synthase alpha/beta family, nucleotide-binding domain;; ATP synthase alpha/beta family, beta-barrel domain;; ATPase family associated with various cellular activities (AAA);; ATP synthase, Delta/Epsilon chain, beta-sandwich domain;; ATP synthase, Delta/Epsilon chain, long alpha-helix domain	ATP synthase subunit beta, chloroplastic {ECO:0000255|HAMAP-Rule:MF_01347} OS=Medicago sativa (Alfalfa) PE=3 SV=1	C	Energy production and conversion	RecName: Full=ATP synthase subunit beta, chloroplastic; AltName: Full=ATP synthase F1 sector subunit beta; AltName: Full=F-ATPase subunit beta (chloroplast) [Medicago sativa]
alpha	F01_transcript/1971	498	264	381	160	154	118	10.61	5.62	8.02	2.85	3.34	2.54	0.0022736	-1.54886	down	[C]	Energy production and conversion	Molecular Function: ATP binding (GO:0005524);; Cellular Component: plasma membrane (GO:0005886);; Cellular Component: chloroplast thylakoid membrane (GO:0009535);; Biological Process: ATP synthesis coupled proton transport (GO:0015986);; Biological Process: ATP hydrolysis coupled proton transport (GO:0015991);; Cellular Component: proton-transporting ATP synthase complex, catalytic core F(1) (GO:…	K02111|0|cam:6797510|K02111 F-type H+-transporting ATPase subunit alpha [EC:3.6.3.14] | (RefSeq) atpA, CiarC_p026; ATP synthase CF1 alpha subunit	ko00190:Oxidative phosphorylation;ko00195:Photosynthesis	[C]	Energy production and conversion	ATP synthase alpha/beta family, nucleotide-binding domain;; ATP synthase alpha/beta chain, C terminal domain;; ATP synthase alpha/beta family, beta-barrel domain	ATP synthase subunit alpha, chloroplastic {ECO:0000255|HAMAP-Rule:MF_01346} OS=Lotus japonicus (Lotus corniculatus var. japonicus) PE=3 SV=1	C	Energy production and conversion	ATP synthase CF1 alpha subunit (chloroplast) [Medicago truncatula f. tricycla]
	F01_transcript/2401	3	1	3	200	252	170	0.08	0.03	0.08	3.7	5.67	3.82	2.0939e-28	6.33668	up	--	--	Cellular Component: integral component of membrane (GO:0016021);;	--	--	--	--	Tetratricopeptide repeat;; Tetratricopeptide repeat;; Tetratricopeptide repeat;; TPR repeat;; Tetratricopeptide repeat;; Tetratricopeptide repeat	--	S	Function unknown	hypothetical protein MTR_3g100100 [Medicago truncatula]
	F01_transcript/3336	702	480	438	68	64	86	17.21	11.76	10.62	1.39	1.59	2.14	3.50622e-08	-3.01847	down	[C]	Energy production and conversion	Molecular Function: ATP binding (GO:0005524);; Cellular Component: plasma membrane (GO:0005886);; Cellular Component: chloroplast thylakoid membrane (GO:0009535);; Biological Process: ATP synthesis coupled proton transport (GO:0015986);; Biological Process: ATP hydrolysis coupled proton transport (GO:0015991);; Cellular Component: proton-transporting ATP synthase complex, catalytic core F(1) (GO:…	K02111|0|cam:6797510|K02111 F-type H+-transporting ATPase subunit alpha [EC:3.6.3.14] | (RefSeq) atpA, CiarC_p026; ATP synthase CF1 alpha subunit	ko00190:Oxidative phosphorylation;ko00195:Photosynthesis	[C]	Energy production and conversion	ATP synthase alpha/beta family, nucleotide-binding domain;; ATP synthase alpha/beta chain, C terminal domain;; ATP synthase alpha/beta family, beta-barrel domain;; ATP synthase B/B' CF(0)	ATP synthase subunit alpha, chloroplastic {ECO:0000255|HAMAP-Rule:MF_01346} OS=Lotus japonicus (Lotus corniculatus var. japonicus) PE=3 SV=1	C	Energy production and conversion	ATP synthase CF1 alpha subunit (chloroplast) [Medicago truncatula f. tricycla]
b	F01_transcript/18372	914	1055	1070	597	300	462	154.68	177.73	179.21	84.91	53.71	83.19	4.87004e-20	-1.29843	down	[C]	Energy production and conversion	Molecular Function: ATP binding (GO:0005524);; Cellular Component: chloroplast thylakoid membrane (GO:0009535);; Biological Process: response to cytokinin (GO:0009735);; Cellular Component: chloroplast envelope (GO:0009941);; Molecular Function: hydrogen ion transmembrane transporter activity (GO:0015078);; Biological Process: ATP synthesis coupled proton transport (GO:0015986);; Cellular Compone…	K02109|1.63874e-109|mtr:MTR_3g106820|K02109 F-type H+-transporting ATPase subunit b | (RefSeq) ATP synthase, F0 subunit B	ko00190:Oxidative phosphorylation;ko00195:Photosynthesis	--	--	ATP synthase B/B' CF(0)	ATP synthase subunit b&apos;, chloroplastic (Precursor) GN=ATPG OS=Spinacia oleracea (Spinach) PE=1 SV=2	U	Intracellular trafficking, secretion, and vesicular transport	ATP synthase [Medicago truncatula]
PsaK	F01_transcript/19016	267	218	273	41	17	19	58.75	47.83	59.51	7.68	4.18	4.62	1.95743e-31	-3.46977	down	--	--	Cellular Component: photosystem I (GO:0009522);; Cellular Component: chloroplast thylakoid membrane (GO:0009535);; Biological Process: photosynthesis (GO:0015979);; Cellular Component: integral component of membrane (GO:0016021);; Molecular Function: chlorophyll binding (GO:0016168);;	K02698|9.65271e-67|cam:101506632|K02698 photosystem I subunit X | (RefSeq) photosystem I reaction center subunit psaK, chloroplastic	ko00195:Photosynthesis	--	--	Photosystem I psaG / psaK	Photosystem I reaction center subunit psaK, chloroplastic (Precursor) GN=PSAK OS=Medicago sativa (Alfalfa) PE=2 SV=1	S	Function unknown	RecName: Full=Photosystem I reaction center subunit psaK, chloroplastic; AltName: Full=PSI-K; AltName: Full=Photosystem I subunit X; Flags: Precursor [Medicago sativa]
	F01_transcript/19199	1112	1356	1281	493	301	407	248.68	301.51	283.79	93.1	72.46	98.74	1.1027e-73	-1.77222	down	--	--	Cellular Component: photosystem I (GO:0009522);; Cellular Component: chloroplast thylakoid membrane (GO:0009535);; Biological Process: photosynthesis (GO:0015979);; Cellular Component: integral component of membrane (GO:0016021);; Molecular Function: chlorophyll binding (GO:0016168);;	K02698|2.62177e-69|cam:101506632|K02698 photosystem I subunit X | (RefSeq) photosystem I reaction center subunit psaK, chloroplastic	ko00195:Photosynthesis	--	--	Photosystem I psaG / psaK	Photosystem I reaction center subunit psaK, chloroplastic (Precursor) GN=PSAK OS=Medicago sativa (Alfalfa) PE=2 SV=1	S	Function unknown	unknown [Medicago truncatula]
PsaL	F01_transcript/19553	1651	1880	1916	1045	609	799	400.7	453.87	460.81	214.34	160.13	211.85	3.47491e-34	-1.28624	down	--	--	Molecular Function: protein binding (GO:0005515);; Cellular Component: chloroplast thylakoid membrane (GO:0009535);; Cellular Component: photosystem I reaction center (GO:0009538);; Cellular Component: plastoglobule (GO:0010287);; Cellular Component: integral component of membrane (GO:0016021);; Biological Process: photosynthesis, light reaction (GO:0019684);; Cellular Component: chloroplast memb…	K02699|2.12022e-40|mtr:MTR_7g079900|K02699 photosystem I subunit XI | (RefSeq) photosystem I reaction center subunit XI	ko00195:Photosynthesis	--	--	Photosystem I reaction centre subunit XI	Photosystem I reaction center subunit XI, chloroplastic (Precursor) GN=PSAL OS=Arabidopsis thaliana (Mouse-ear cress) PE=1 SV=2	C	Energy production and conversion	photosystem I subunit XI Mrna (chloroplast) [Solanum tuberosum]
PsaN	F01_transcript/17947	1944	2084	1810	12614	8897	9956	292.78	312.52	269.87	1594.77	1409.94	1583.45	2.11671e-57	2.29704	up	--	--	Cellular Component: photosystem I (GO:0009522);; Biological Process: photosynthesis (GO:0015979);;	K02701|4.45848e-101|mtr:MTR_3g095540|K02701 photosystem I subunit PsaN | (RefSeq) photosystem I reaction center subunit N	ko00195:Photosynthesis	--	--	Photosystem I reaction centre subunit N (PSAN or PSI-N)	Photosystem I reaction center subunit N, chloroplastic (Precursor) GN=PSAN OS=Arabidopsis thaliana (Mouse-ear cress) PE=1 SV=2	S	Function unknown	Photosystem I reaction center subunit N [Medicago truncatula]
PsaO	F01_transcript/17186	3612	4005	4165	12980	8858	10742	461.98	510.41	527.22	1391.8	1184.29	1439.4	3.21897e-18	1.33777	up	--	--	Cellular Component: integral component of membrane (GO:0016021);;	K14332|9.93093e-83|cam:101500027|K14332 photosystem I subunit PsaO | (RefSeq) photosystem I subunit O	ko00195:Photosynthesis	--	--	--	Photosystem I subunit O (Precursor) GN=PSAO OS=Arabidopsis thaliana (Mouse-ear cress) PE=1 SV=1	S	Function unknown	unknown [Medicago truncatula]
	F01_transcript/19327	14	11	10	366	221	252	3.2	2.51	2.28	67.72	52.2	59.72	1.22277e-35	4.43184	up	--	--	Cellular Component: integral component of membrane (GO:0016021);;	K14332|3.28994e-49|cam:101500027|K14332 photosystem I subunit PsaO | (RefSeq) photosystem I subunit O	ko00195:Photosynthesis	--	--	--	Photosystem I subunit O (Precursor) GN=PSAO OS=Arabidopsis thaliana (Mouse-ear cress) PE=1 SV=1	S	Function unknown	unknown [Medicago truncatula]
	F01_transcript/19747	22	17	32	155	116	196	6.05	4.6	8.61	34.81	33.4	57.25	1.97504e-07	2.60193	up	--	--	Cellular Component: integral component of membrane (GO:0016021);;	K14332|2.49667e-53|cam:101500027|K14332 photosystem I subunit PsaO | (RefSeq) photosystem I subunit O	ko00195:Photosynthesis	--	--	--	Photosystem I subunit O (Precursor) GN=PSAO OS=Arabidopsis thaliana (Mouse-ear cress) PE=1 SV=1	S	Function unknown	unknown [Medicago truncatula]
	F01_transcript/19162	1212	1353	1412	16	16	29	267.15	296.59	308.41	3.08	3.87	7.02	0	-6.12063	down	--	--	Cellular Component: integral component of membrane (GO:0016021);;	K14332|1.82462e-84|cam:101500027|K14332 photosystem I subunit PsaO | (RefSeq) photosystem I subunit O	ko00195:Photosynthesis	--	--	--	Photosystem I subunit O (Precursor) GN=PSAO OS=Arabidopsis thaliana (Mouse-ear cress) PE=1 SV=1	S	Function unknown	unknown [Medicago truncatula]
	F01_transcript/19919	63	102	84	8	6	6	17.27	27.87	22.87	1.86	2.01	2.1	1.90309e-17	-3.76013	down	--	--	Cellular Component: chloroplast (GO:0009507);; Cellular Component: integral component of membrane (GO:0016021);;	K14332|4.19344e-44|cam:101500027|K14332 photosystem I subunit PsaO | (RefSeq) photosystem I subunit O	ko00195:Photosynthesis	--	--	--	Photosystem I subunit O (Precursor) GN=PSAO OS=Arabidopsis thaliana (Mouse-ear cress) PE=1 SV=1	S	Function unknown	unknown [Medicago truncatula]
	F01_transcript/21357	134	192	202	0	0	0	173.95	247.82	252.21	0	0	0	4.12892e-56	#NAME?	down	--	--	--	K14332|6.59774e-07|bdi:100840579|K14332 photosystem I subunit PsaO | (RefSeq) photosystem I subunit O	ko00195:Photosynthesis	--	--	--	Photosystem I subunit O (Precursor) GN=PSAO OS=Arabidopsis thaliana (Mouse-ear cress) PE=1 SV=1	S	Function unknown	unknown [Medicago truncatula]
C_CK_vs_C_L (C2)
		T13_Count	T14_Count	T15_Count	T16_Count	T17_Count	T18_Count	T13_FPKM	T14_FPKM	T15_FPKM	T16_FPKM	T17_FPKM	T18_FPKM	FDR	log2FC	regulated	COG_class	COG_class_annotation	GO_annotation	KEGG_annotation	KEGG_pathway	KOG_class	KOG_class_annotation	Pfam_annotation	Swissprot_annotation	eggNOG_class	eggNOG_class_annotation	nr_annotation
PsbB	F01_transcript/2102	489	515	496	227	303	192	10.44	12.23	11.32	4.71	5.87	4.18	4.13021e-17	-1.18998	down	[C]	Energy production and conversion	Cellular Component: photosystem II (GO:0009523);; Cellular Component: chloroplast thylakoid membrane (GO:0009535);; Biological Process: photosynthetic electron transport in photosystem II (GO:0009772);; Cellular Component: integral component of membrane (GO:0016021);; Molecular Function: chlorophyll binding (GO:0016168);; Biological Process: protein-chromophore linkage (GO:0018298);; Molecular Fu…	K02704|0|mtr:MTR_4g051370|K02704 photosystem II CP47 chlorophyll apoprotein | (RefSeq) photosystem II CP47 chlorophyll A apoprotein	ko00195:Photosynthesis	--	--	Photosystem II protein;; Cytochrome b/b6/petB;; Cytochrome b(N-terminal)/b6/petB;; Photosystem II 10 kDa phosphoprotein	Photosystem II CP47 reaction center protein {ECO:0000255|HAMAP-Rule:MF_01495} OS=Cicer arietinum (Chickpea) PE=3 SV=1	S	Function unknown	Photosystem II CP47 chlorophyll apoprotein [Medicago truncatula]
PetB	F01_transcript/413	128	109	93	35	37	31	1.99	1.88	1.56	0.54	0.53	0.49	2.08232e-11	-1.80175	down	[C]	Energy production and conversion	Molecular Function: iron ion binding (GO:0005506);; Cellular Component: chloroplast thylakoid membrane (GO:0009535);; Biological Process: photosynthesis (GO:0015979);; Cellular Component: integral component of membrane (GO:0016021);; Molecular Function: oxidoreductase activity (GO:0016491);; Molecular Function: heme binding (GO:0020037);; Biological Process: respiratory electron transport chain (…	K02635|3.69234e-141|cmo:103504414|K02635 cytochrome b6 | (RefSeq) cytochrome b6	ko00195:Photosynthesis	[C]	Energy production and conversion	Cytochrome b/b6/petB;; Cytochrome b(N-terminal)/b6/petB;; Photosystem II protein;; Cytochrome b(C-terminal)/b6/petD;; Photosystem II 10 kDa phosphoprotein	Cytochrome b6 {ECO:0000255|HAMAP-Rule:MF_00633} OS=Oenothera elata subsp. hookeri (Hooker&apos;s evening primrose) PE=3 SV=2	C	Energy production and conversion	PREDICTED: LOW QUALITY PROTEIN: cytochrome b6, partial [Cucumis melo]
PsbP	F01_transcript/15420	1086	933	957	7971	7756	7382	93.83	89.54	87.56	681.7	606.57	652.4	0	2.83786	up	--	--	Molecular Function: calcium ion binding (GO:0005509);; Cellular Component: chloroplast thylakoid membrane (GO:0009535);; Cellular Component: photosystem II oxygen evolving complex (GO:0009654);; Biological Process: photosynthesis (GO:0015979);; Cellular Component: extrinsic component of membrane (GO:0019898);;	K02717|1.90406e-150|cam:101514916|K02717 photosystem II oxygen-evolving enhancer protein 2 | (RefSeq) oxygen-evolving enhancer protein 2, chloroplastic	ko00195:Photosynthesis	--	--	PsbP	Oxygen-evolving enhancer protein 2, chloroplastic (Precursor) GN=PSBP OS=Pisum sativum (Garden pea) PE=1 SV=1	S	Function unknown	unknown [Medicago truncatula]
PsbQ	F01_transcript/17244	197	183	199	535	606	582	25.3	26.07	26.93	68.84	70.19	76.42	7.13969e-37	1.45183	up	--	--	Molecular Function: calcium ion binding (GO:0005509);; Cellular Component: photosystem II oxygen evolving complex (GO:0009654);; Biological Process: photosynthesis (GO:0015979);; Cellular Component: extrinsic component of membrane (GO:0019898);;	K08901|3.0785e-104|mtr:MTR_5g041910|K08901 photosystem II oxygen-evolving enhancer protein 3 | (RefSeq) oxygen-evolving enhancer protein	ko00195:Photosynthesis	--	--	Oxygen evolving enhancer protein 3 (PsbQ)	PsbQ-like protein 1, chloroplastic (Precursor) GN=F7A19.23 OS=Arabidopsis thaliana (Mouse-ear cress) PE=1 SV=1	S	Function unknown	unknown [Medicago truncatula]
	F01_transcript/17015	1141	988	1102	531	538	493	130.3	125.28	132.71	60.63	55.63	57.66	1.05654e-46	-1.16896	down	--	--	Molecular Function: calcium ion binding (GO:0005509);; Cellular Component: photosystem II oxygen evolving complex (GO:0009654);; Biological Process: photosynthesis (GO:0015979);; Cellular Component: extrinsic component of membrane (GO:0019898);;	K08901|1.42034e-110|mtr:MTR_5g041910|K08901 photosystem II oxygen-evolving enhancer protein 3 | (RefSeq) oxygen-evolving enhancer protein	ko00195:Photosynthesis	--	--	Oxygen evolving enhancer protein 3 (PsbQ)	PsbQ-like protein 1, chloroplastic (Precursor) GN=F7A19.23 OS=Arabidopsis thaliana (Mouse-ear cress) PE=1 SV=1	S	Function unknown	Oxygen-evolving enhancer protein 3-2 [Medicago truncatula]
PsbR	F01_transcript/18244	27	30	27	71	88	40	5.37	6.55	5.48	14.32	15.56	8	0.0069498	1.10168	up	--	--	Cellular Component: photosystem II oxygen evolving complex (GO:0009654);; Biological Process: photosynthesis (GO:0015979);; Cellular Component: integral component of membrane (GO:0016021);;	K03541|1.65183e-70|mtr:MTR_2g064650|K03541 photosystem II 10kDa protein | (RefSeq) photosystem II 10 kDa proteinPsbR protein	ko00195:Photosynthesis	--	--	Photosystem II 10 kDa polypeptide PsbR	Photosystem II 10 kDa polypeptide, chloroplastic (Precursor) GN=PSBR OS=Solanum tuberosum (Potato) PE=2 SV=1	S	Function unknown	Photosystem II 10 kDa polypeptide [Medicago truncatula]
	F01_transcript/17125	39083	35259	36603	13899	16038	13653	5002.55	5008.97	4928.98	1786.74	1855.09	1790.79	4.61657e-71	-1.47135	down	--	--	Cellular Component: photosystem II oxygen evolving complex (GO:0009654);; Biological Process: photosynthesis (GO:0015979);; Cellular Component: integral component of membrane (GO:0016021);;	K03541|1.38076e-71|mtr:MTR_2g064650|K03541 photosystem II 10kDa protein | (RefSeq) photosystem II 10 kDa proteinPsbR protein	ko00195:Photosynthesis	--	--	Photosystem II 10 kDa polypeptide PsbR	Photosystem II 10 kDa polypeptide, chloroplastic (Precursor) GN=PSBR OS=Solanum tuberosum (Potato) PE=2 SV=1	S	Function unknown	Photosystem II 10 kDa polypeptide [Medicago truncatula]
PsbW	F01_transcript/20577	3	10	9	35	33	28	1.97	6.01	4.84	19.92	15.18	15.23	0.000161201	1.97456	up	--	--	Cellular Component: photosystem II (GO:0009523);; Cellular Component: chloroplast thylakoid membrane (GO:0009535);; Biological Process: photosynthesis (GO:0015979);; Cellular Component: integral component of membrane (GO:0016021);;	K02721|2.22466e-22|cam:101505752|K02721 photosystem II PsbW protein | (RefSeq) photosystem II reaction center W protein, chloroplastic-like	ko00195:Photosynthesis	--	--	Photosystem II reaction centre W protein (PsbW)	Photosystem II reaction center W protein, chloroplastic (Precursor) GN=psbW OS=Spinacia oleracea (Spinach) PE=1 SV=1	S	Function unknown	PREDICTED: photosystem II reaction center W protein, chloroplastic-like [Cicer arietinum]
PetE	F01_transcript/17953	2834	2598	2814	9896	11398	9165	484.76	493.06	503.04	1725.87	1758.93	1609.39	2.6051e-103	1.75979	up	[C]	Energy production and conversion	Molecular Function: copper ion binding (GO:0005507);; Molecular Function: electron carrier activity (GO:0009055);; Cellular Component: chloroplast thylakoid membrane (GO:0009535);; Cellular Component: integral component of membrane (GO:0016021);; Biological Process: oxidation-reduction process (GO:0055114);;	K02638|4.9974e-94|mtr:MTR_3g114850|K02638 plastocyanin | (RefSeq) plastocyanin	ko00195:Photosynthesis	--	--	Copper binding proteins, plastocyanin/azurin family	Plastocyanin, chloroplastic (Precursor) GN=PETE OS=Pisum sativum (Garden pea) PE=4 SV=1	C	Energy production and conversion	Plastocyanin [Medicago truncatula]
PetF	F01_transcript/17401	344	215	203	919	1024	881	49.41	34.28	30.65	133.08	132.52	129.54	7.08066e-58	1.77741	up	[C]	Energy production and conversion	Molecular Function: protein binding (GO:0005515);; Molecular Function: electron carrier activity (GO:0009055);; Cellular Component: chloroplast (GO:0009507);; Biological Process: electron transport chain (GO:0022900);; Molecular Function: metal ion binding (GO:0046872);; Molecular Function: 2 iron, 2 sulfur cluster binding (GO:0051537);;	K02639|1.73835e-82|mtr:MTR_2g006290|K02639 ferredoxin | (RefSeq) 2Fe-2S ferredoxin superfamily protein	ko00195:Photosynthesis	--	--	2Fe-2S iron-sulfur cluster binding domain	Ferredoxin-1, chloroplastic (Precursor) GN=PETF OS=Pisum sativum (Garden pea) PE=1 SV=2	C	Energy production and conversion	Ferredoxin I [Medicago truncatula]
	F01_transcript/21206	87	70	76	188	318	254	83.69	72.23	68.86	203.14	268.34	250.46	2.78668e-07	1.58232	up	[C]	Energy production and conversion	Biological Process: ferredoxin metabolic process (GO:0006124);; Molecular Function: ferrous iron binding (GO:0008198);; Molecular Function: electron carrier activity (GO:0009055);; Cellular Component: chloroplast (GO:0009507);; Biological Process: electron transport chain (GO:0022900);; Molecular Function: 2 iron, 2 sulfur cluster binding (GO:0051537);;	K02639|4.04226e-20|mtr:MTR_2g006290|K02639 ferredoxin | (RefSeq) 2Fe-2S ferredoxin superfamily protein	ko00195:Photosynthesis	--	--	--	Ferredoxin OS=Medicago sativa (Alfalfa) PE=1 SV=1	C	Energy production and conversion	RecName: Full=Ferredoxin [Medicago sativa]
PetH	F01_transcript/12300	625	541	658	16682	16715	14588	31.49	30.3	35.32	821.48	763.08	750.4	0	4.59594	up	[P]	Inorganic ion transport and metabolism	Molecular Function: nucleotide binding (GO:0000166);; Molecular Function: ferredoxin-NADP+ reductase activity (GO:0004324);; Molecular Function: protein binding (GO:0005515);; Molecular Function: poly(U) RNA binding (GO:0008266);; Cellular Component: chloroplast thylakoid membrane (GO:0009535);; Cellular Component: chloroplast stroma (GO:0009570);; Biological Process: photosynthetic electron tran…	K02641|0|mtr:MTR_5g022300|K02641 ferredoxin--NADP+ reductase [EC:1.18.1.2] | (RefSeq) leaf ferredoxin-NADP reductase	ko00195:Photosynthesis	[C]	Energy production and conversion	Oxidoreductase NAD-binding domain;; Oxidoreductase FAD-binding domain	Ferredoxin--NADP reductase, leaf isozyme, chloroplastic (Precursor) GN=PETH OS=Pisum sativum (Garden pea) PE=1 SV=1	P	Inorganic ion transport and metabolism	Ferredoxin-NADP reductase [Medicago truncatula]
	F01_transcript/13117	18295	16438	16665	3067	3132	2873	991.57	989.5	961.34	162.73	153.82	159.06	0	-2.62357	down	[P]	Inorganic ion transport and metabolism	Molecular Function: nucleotide binding (GO:0000166);; Molecular Function: ferredoxin-NADP+ reductase activity (GO:0004324);; Molecular Function: protein binding (GO:0005515);; Molecular Function: poly(U) RNA binding (GO:0008266);; Cellular Component: chloroplast thylakoid membrane (GO:0009535);; Cellular Component: chloroplast stroma (GO:0009570);; Biological Process: photosynthetic electron tran…	K02641|0|mtr:MTR_5g022300|K02641 ferredoxin--NADP+ reductase [EC:1.18.1.2] | (RefSeq) leaf ferredoxin-NADP reductase	ko00195:Photosynthesis	[C]	Energy production and conversion	Oxidoreductase NAD-binding domain;; Oxidoreductase FAD-binding domain	Ferredoxin--NADP reductase, leaf isozyme, chloroplastic (Precursor) GN=PETH OS=Pisum sativum (Garden pea) PE=1 SV=1	P	Inorganic ion transport and metabolism	Ferredoxin-NADP reductase [Medicago truncatula]
PsbY	F01_transcript/20767	426	387	412	907	1096	1133	226.72	225.45	216.65	529.4	518.1	620.27	2.81335e-14	1.23694	up	--	--	Cellular Component: photosystem II (GO:0009523);; Biological Process: photosynthesis (GO:0015979);; Cellular Component: integral component of membrane (GO:0016021);; Molecular Function: manganese ion binding (GO:0030145);;	K02723|1.82828e-44|mtr:MTR_3g086230|K02723 photosystem II PsbY protein | (RefSeq) photosystem II core complex family psbY protein	ko00195:Photosynthesis	--	--	Photosystem II protein Y (PsbY)	Photosystem II protein psbY-2, chloroplastic (Precursor) GN=PSBY OS=Spinacia oleracea (Spinach) PE=1 SV=2	I	Lipid transport and metabolism	unknown [Medicago truncatula]
	F01_transcript/19414	1153	1060	1020	3	2	0	274.8	280	251.34	0.76	0.44	0	0	-9.48345	down	--	--	Cellular Component: photosystem II (GO:0009523);; Biological Process: photosynthesis (GO:0015979);; Cellular Component: integral component of membrane (GO:0016021);; Molecular Function: manganese ion binding (GO:0030145);;	K02723|8.02518e-79|mtr:MTR_3g086230|K02723 photosystem II PsbY protein | (RefSeq) photosystem II core complex family psbY protein	ko00195:Photosynthesis	--	--	Photosystem II protein Y (PsbY)	Photosystem II protein psbY-2, chloroplastic (Precursor) GN=PSBY OS=Spinacia oleracea (Spinach) PE=1 SV=2	I	Lipid transport and metabolism	unknown [Medicago truncatula]
Psb27	F01_transcript/17189	165	95	140	379	501	619	20.39	13.07	18.29	47.03	55.97	78.42	5.16984e-06	1.80296	up	--	--	Cellular Component: chloroplast thylakoid lumen (GO:0009543);; Biological Process: photosystem II repair (GO:0010206);; Biological Process: photosystem II assembly (GO:0010207);;	K08902|5.02003e-74|cam:101500783|K08902 photosystem II Psb27 protein | (RefSeq) photosystem II repair protein PSB27-H1, chloroplastic	ko00195:Photosynthesis	--	--	Photosystem II Pbs27	Photosystem II repair protein PSB27-H1, chloroplastic (Precursor) OS=Arabidopsis thaliana (Mouse-ear cress) PE=1 SV=1	G	Carbohydrate transport and metabolism	photosystem II Pbs27 protein [Medicago truncatula]
	F01_transcript/17811	678	648	826	1549	1801	1533	94.41	100.16	120.85	217.48	226.48	218.83	2.63769e-30	1.05703	up	--	--	Cellular Component: chloroplast thylakoid lumen (GO:0009543);; Biological Process: photosystem II repair (GO:0010206);; Biological Process: photosystem II assembly (GO:0010207);;	K08902|5.73061e-75|cam:101500783|K08902 photosystem II Psb27 protein | (RefSeq) photosystem II repair protein PSB27-H1, chloroplastic	ko00195:Photosynthesis	--	--	Photosystem II Pbs27	Photosystem II repair protein PSB27-H1, chloroplastic (Precursor) OS=Arabidopsis thaliana (Mouse-ear cress) PE=1 SV=1	G	Carbohydrate transport and metabolism	photosystem II Pbs27 protein [Medicago truncatula]
	F01_transcript/17718	673	657	671	168	192	192	102.51	111.02	107.16	26.04	26.46	30.13	1.6008e-72	-1.97983	down	--	--	Cellular Component: chloroplast thylakoid lumen (GO:0009543);; Biological Process: photosystem II repair (GO:0010206);; Biological Process: photosystem II assembly (GO:0010207);;	K08902|4.7607e-76|cam:101500783|K08902 photosystem II Psb27 protein | (RefSeq) photosystem II repair protein PSB27-H1, chloroplastic	ko00195:Photosynthesis	--	--	Photosystem II Pbs27	Photosystem II repair protein PSB27-H1, chloroplastic (Precursor) OS=Arabidopsis thaliana (Mouse-ear cress) PE=1 SV=1	G	Carbohydrate transport and metabolism	photosystem II Pbs27 protein [Medicago truncatula]
PsaA	F01_transcript/333	844	1010	932	194	118	363	12.87	17.1	15.21	2.87	1.64	5.65	1.05215e-13	-2.14645	down	[M]	Cell wall/membrane/envelope biogenesis	Molecular Function: magnesium ion binding (GO:0000287);; Molecular Function: electron carrier activity (GO:0009055);; Cellular Component: photosystem I (GO:0009522);; Cellular Component: chloroplast thylakoid membrane (GO:0009535);; Biological Process: photosynthesis (GO:0015979);; Cellular Component: integral component of membrane (GO:0016021);; Molecular Function: chlorophyll binding (GO:001616…	K02689|0|mtr:MetrCp066|K02689 photosystem I P700 chlorophyll a apoprotein A1 | (RefSeq) psaA; photosystem I P700 chlorophyll a apoprotein A1	ko00195:Photosynthesis	--	--	Photosystem I psaA/psaB protein;; Photosystem I psaA/psaB protein;; Photosystem I psaA/psaB protein;; Ribosomal protein S14p/S29e	Photosystem I P700 chlorophyll a apoprotein A1 {ECO:0000255|HAMAP-Rule:MF_00458} GN=CsCp034 OS=Cucumis sativus (Cucumber) PE=3 SV=1	C	Energy production and conversion	photosystem I P700 apoprotein A1 [Medicago truncatula]
PsaB	F01_transcript/2784	104	4	35	172	184	120	2.35	0.12	0.84	3.74	3.74	2.75	0.00215051	1.66062	up	[M]	Cell wall/membrane/envelope biogenesis	Molecular Function: magnesium ion binding (GO:0000287);; Molecular Function: electron carrier activity (GO:0009055);; Cellular Component: photosystem I (GO:0009522);; Cellular Component: chloroplast thylakoid membrane (GO:0009535);; Biological Process: photosynthesis (GO:0015979);; Cellular Component: integral component of membrane (GO:0016021);; Molecular Function: chlorophyll binding (GO:001616…	K02690|0|mtr:MTR_3g035600|K02690 photosystem I P700 chlorophyll a apoprotein A2 | (RefSeq) photosystem I P700 chlorophyll A apoprotein A2	ko00195:Photosynthesis	--	--	Photosystem I psaA/psaB protein;; Photosystem I psaA/psaB protein;; Ribosomal protein S14p/S29e	Photosystem I P700 chlorophyll a apoprotein A2 {ECO:0000255|HAMAP-Rule:MF_00482} OS=Lotus japonicus (Lotus corniculatus var. japonicus) PE=3 SV=1	C	Energy production and conversion	photosystem I P700 chlorophyll A apoprotein A2 [Medicago truncatula]
PsaF	F01_transcript/15487	4126	3679	3866	20016	21534	21387	359.49	355.84	356.63	1726.32	1697.73	1905.67	8.83863e-151	2.31154	up	--	--	Cellular Component: plastid (GO:0009536);; Cellular Component: photosystem I reaction center (GO:0009538);; Biological Process: photosynthesis (GO:0015979);; Cellular Component: integral component of membrane (GO:0016021);;	K02694|9.91521e-126|cam:101506661|K02694 photosystem I subunit III | (RefSeq) photosystem I reaction center subunit III, chloroplastic	ko00195:Photosynthesis	--	--	Photosystem I reaction centre subunit III	Photosystem I reaction center subunit III, chloroplastic (Precursor) GN=PSAF OS=Arabidopsis thaliana (Mouse-ear cress) PE=1 SV=1	S	Function unknown	unknown [Medicago truncatula]
	F01_transcript/16057	719	713	858	6910	8444	9513	68.72	75.68	86.67	655.24	729.59	929.49	4.82151e-26	3.32155	up	--	--	Cellular Component: plastid (GO:0009536);; Cellular Component: photosystem I reaction center (GO:0009538);; Biological Process: photosynthesis (GO:0015979);; Cellular Component: integral component of membrane (GO:0016021);;	K02694|5.71879e-95|cam:101506661|K02694 photosystem I subunit III | (RefSeq) photosystem I reaction center subunit III, chloroplastic	ko00195:Photosynthesis	--	--	Photosystem I reaction centre subunit III	Photosystem I reaction center subunit III, chloroplastic (Precursor) GN=PSAF OS=Flaveria trinervia (Clustered yellowtops) PE=2 SV=1	S	Function unknown	unknown [Medicago truncatula]
	F01_transcript/15536	10420	9584	9839	1660	1782	1352	911.54	930.84	911.26	143.83	141.13	120.98	0	-2.76448	down	--	--	Cellular Component: plastid (GO:0009536);; Cellular Component: photosystem I reaction center (GO:0009538);; Biological Process: photosynthesis (GO:0015979);; Cellular Component: integral component of membrane (GO:0016021);;	K02694|2.05773e-94|cam:101506661|K02694 photosystem I subunit III | (RefSeq) photosystem I reaction center subunit III, chloroplastic	ko00195:Photosynthesis	--	--	Photosystem I reaction centre subunit III	Photosystem I reaction center subunit III, chloroplastic (Precursor) GN=PSAF OS=Flaveria trinervia (Clustered yellowtops) PE=2 SV=1	S	Function unknown	unknown [Medicago truncatula]
	F01_transcript/16432	13500	11908	12579	3180	3359	3521	1433.56	1403.69	1410.09	336.58	322.58	382.75	1.1706e-241	-2.03469	down	--	--	Cellular Component: plastid (GO:0009536);; Cellular Component: photosystem I reaction center (GO:0009538);; Biological Process: photosynthesis (GO:0015979);; Cellular Component: integral component of membrane (GO:0016021);;	K02694|5.22106e-127|cam:101506661|K02694 photosystem I subunit III | (RefSeq) photosystem I reaction center subunit III, chloroplastic	ko00195:Photosynthesis	--	--	Photosystem I reaction centre subunit III	Photosystem I reaction center subunit III, chloroplastic (Precursor) GN=PSAF OS=Arabidopsis thaliana (Mouse-ear cress) PE=1 SV=1	S	Function unknown	unknown [Medicago truncatula]
beta	F01_transcript/5015	36	60	42	13	8	29	1.03	1.9	1.28	0.37	0.22	0.85	0.0052799	-1.57139	down	[C]	Energy production and conversion	Molecular Function: ATP binding (GO:0005524);; Cellular Component: plasma membrane (GO:0005886);; Cellular Component: chloroplast thylakoid membrane (GO:0009535);; Biological Process: ATP synthesis coupled proton transport (GO:0015986);; Biological Process: ATP hydrolysis coupled proton transport (GO:0015991);; Cellular Component: integral component of membrane (GO:0016021);; Cellular Component: …	K02112|0|mtr:MetrCp073|K02112 F-type H+-transporting ATPase subunit beta [EC:3.6.3.14] | (RefSeq) atpB; ATP synthase CF1 beta subunit	ko00190:Oxidative phosphorylation;ko00195:Photosynthesis	[C]	Energy production and conversion	ATP synthase alpha/beta family, nucleotide-binding domain;; ATP synthase alpha/beta family, beta-barrel domain;; ATPase family associated with various cellular activities (AAA);; ATP synthase, Delta/Epsilon chain, beta-sandwich domain;; ATP synthase, Delta/Epsilon chain, long alpha-helix domain	ATP synthase subunit beta, chloroplastic {ECO:0000255|HAMAP-Rule:MF_01347} OS=Medicago sativa (Alfalfa) PE=3 SV=1	C	Energy production and conversion	RecName: Full=ATP synthase subunit beta, chloroplastic; AltName: Full=ATP synthase F1 sector subunit beta; AltName: Full=F-ATPase subunit beta (chloroplast) [Medicago sativa]
gamma	F01_transcript/16305	823	713	872	1809	2006	1738	84.62	81.41	94.65	185.09	186.43	182.81	6.53371e-58	1.08344	up	[C]	Energy production and conversion	Cellular Component: chloroplast thylakoid membrane (GO:0009535);; Biological Process: photosynthetic electron transport in photosystem II (GO:0009772);; Cellular Component: chloroplast envelope (GO:0009941);; Biological Process: ATP synthesis coupled proton transport (GO:0015986);; Cellular Component: proton-transporting ATP synthase complex, catalytic core F(1) (GO:0045261);; Molecular Function:…	K02115|6.06814e-139|vvi:100264091|K02115 F-type H+-transporting ATPase subunit gamma | (RefSeq) ATP synthase gamma chain, chloroplastic	ko00190:Oxidative phosphorylation;ko00195:Photosynthesis	[C]	Energy production and conversion	ATP synthase	ATP synthase gamma chain, chloroplastic (Precursor) GN=ATPC OS=Nicotiana tabacum (Common tobacco) PE=1 SV=1	C	Energy production and conversion	unknown [Medicago truncatula]
b	F01_transcript/18372	315	269	268	1010	1183	824	53.47	50.69	47.58	174.73	181.14	143.54	2.63225e-22	1.69759	up	[C]	Energy production and conversion	Molecular Function: ATP binding (GO:0005524);; Cellular Component: chloroplast thylakoid membrane (GO:0009535);; Biological Process: response to cytokinin (GO:0009735);; Cellular Component: chloroplast envelope (GO:0009941);; Molecular Function: hydrogen ion transmembrane transporter activity (GO:0015078);; Biological Process: ATP synthesis coupled proton transport (GO:0015986);; Cellular Compone…	K02109|1.63874e-109|mtr:MTR_3g106820|K02109 F-type H+-transporting ATPase subunit b | (RefSeq) ATP synthase, F0 subunit B	ko00190:Oxidative phosphorylation;ko00195:Photosynthesis	--	--	ATP synthase B/B' CF(0)	ATP synthase subunit b&apos;, chloroplastic (Precursor) GN=ATPG OS=Spinacia oleracea (Spinach) PE=1 SV=2	U	Intracellular trafficking, secretion, and vesicular transport	ATP synthase [Medicago truncatula]
PsaK	F01_transcript/19016	783	661	720	391	420	231	173.67	162.46	165.58	89.91	83.98	52.76	6.29102e-17	-1.18486	down	--	--	Cellular Component: photosystem I (GO:0009522);; Cellular Component: chloroplast thylakoid membrane (GO:0009535);; Biological Process: photosynthesis (GO:0015979);; Cellular Component: integral component of membrane (GO:0016021);; Molecular Function: chlorophyll binding (GO:0016168);;	K02698|9.65271e-67|cam:101506632|K02698 photosystem I subunit X | (RefSeq) photosystem I reaction center subunit psaK, chloroplastic	ko00195:Photosynthesis	--	--	Photosystem I psaG / psaK	Photosystem I reaction center subunit psaK, chloroplastic (Precursor) GN=PSAK OS=Medicago sativa (Alfalfa) PE=2 SV=1	S	Function unknown	RecName: Full=Photosystem I reaction center subunit psaK, chloroplastic; AltName: Full=PSI-K; AltName: Full=Photosystem I subunit X; Flags: Precursor [Medicago sativa]
PsaL	F01_transcript/17661	3234	2708	2781	427	537	367	452.24	420.22	408.39	60.34	67.91	52.63	1.50066e-236	-2.83917	down	--	--	Molecular Function: protein binding (GO:0005515);; Cellular Component: chloroplast thylakoid membrane (GO:0009535);; Cellular Component: photosystem I reaction center (GO:0009538);; Cellular Component: plastoglobule (GO:0010287);; Cellular Component: integral component of membrane (GO:0016021);; Biological Process: photosynthesis, light reaction (GO:0019684);; Cellular Component: chloroplast memb…	K02699|3.60832e-97|mtr:MTR_7g079900|K02699 photosystem I subunit XI | (RefSeq) photosystem I reaction center subunit XI	ko00195:Photosynthesis	--	--	Photosystem I reaction centre subunit XI	Photosystem I reaction center subunit XI, chloroplastic (Precursor) GN=PSAL OS=Arabidopsis thaliana (Mouse-ear cress) PE=1 SV=2	C	Energy production and conversion	Photosystem I reaction center subunit XI [Medicago truncatula]
	F01_transcript/19553	676	631	770	315	410	282	166.19	171.67	195.3	80.78	90.56	71.48	2.50216e-16	-1.17427	down	--	--	Molecular Function: protein binding (GO:0005515);; Cellular Component: chloroplast thylakoid membrane (GO:0009535);; Cellular Component: photosystem I reaction center (GO:0009538);; Cellular Component: plastoglobule (GO:0010287);; Cellular Component: integral component of membrane (GO:0016021);; Biological Process: photosynthesis, light reaction (GO:0019684);; Cellular Component: chloroplast memb…	K02699|2.12022e-40|mtr:MTR_7g079900|K02699 photosystem I subunit XI | (RefSeq) photosystem I reaction center subunit XI	ko00195:Photosynthesis	--	--	Photosystem I reaction centre subunit XI	Photosystem I reaction center subunit XI, chloroplastic (Precursor) GN=PSAL OS=Arabidopsis thaliana (Mouse-ear cress) PE=1 SV=2	C	Energy production and conversion	photosystem I subunit XI Mrna (chloroplast) [Solanum tuberosum]
	F01_transcript/22263	158	157	161	60	100	53	1212.66	1197.39	1028.95	550.09	668.1	447.66	6.05314e-10	-1.29886	down	--	--	Molecular Function: protein binding (GO:0005515);; Cellular Component: chloroplast thylakoid membrane (GO:0009535);; Cellular Component: photosystem I reaction center (GO:0009538);; Cellular Component: plastoglobule (GO:0010287);; Cellular Component: integral component of membrane (GO:0016021);; Biological Process: photosynthesis, light reaction (GO:0019684);; Cellular Component: chloroplast memb…	K02699|1.48158e-14|mtr:MTR_7g079900|K02699 photosystem I subunit XI | (RefSeq) photosystem I reaction center subunit XI	ko00195:Photosynthesis	--	--	--	Photosystem I reaction center subunit XI, chloroplastic (Precursor) GN=PSAL OS=Arabidopsis thaliana (Mouse-ear cress) PE=1 SV=2	C	Energy production and conversion	Photosystem I reaction center subunit XI [Medicago truncatula]
PsaN	F01_transcript/17164	4452	3931	4001	11388	12686	10505	568.74	557.36	537.8	1460.98	1464.43	1375.04	3.23954e-115	1.35793	up	--	--	Cellular Component: photosystem I (GO:0009522);; Biological Process: photosynthesis (GO:0015979);;	K02701|1.16724e-100|mtr:MTR_3g095540|K02701 photosystem I subunit PsaN | (RefSeq) photosystem I reaction center subunit N	ko00195:Photosynthesis	--	--	Photosystem I reaction centre subunit N (PSAN or PSI-N)	Photosystem I reaction center subunit N, chloroplastic (Precursor) GN=PSAN OS=Arabidopsis thaliana (Mouse-ear cress) PE=1 SV=2	S	Function unknown	Photosystem I reaction center subunit N [Medicago truncatula]
	F01_transcript/17947	6991	6333	6810	922	1153	896	1054.04	1059.53	1076.46	140.73	157	138.7	0	-2.88672	down	--	--	Cellular Component: photosystem I (GO:0009522);; Biological Process: photosynthesis (GO:0015979);;	K02701|4.45848e-101|mtr:MTR_3g095540|K02701 photosystem I subunit PsaN | (RefSeq) photosystem I reaction center subunit N	ko00195:Photosynthesis	--	--	Photosystem I reaction centre subunit N (PSAN or PSI-N)	Photosystem I reaction center subunit N, chloroplastic (Precursor) GN=PSAN OS=Arabidopsis thaliana (Mouse-ear cress) PE=1 SV=2	S	Function unknown	Photosystem I reaction center subunit N [Medicago truncatula]
PsaO	F01_transcript/18286	4376	3962	4149	10249	10987	9082	696.09	699.29	691.1	1655.42	1577.41	1482.47	8.74664e-87	1.15567	up	--	--	Cellular Component: integral component of membrane (GO:0016021);;	K14332|7.45777e-84|cam:101500027|K14332 photosystem I subunit PsaO | (RefSeq) photosystem I subunit O	ko00195:Photosynthesis	--	--	--	Photosystem I subunit O (Precursor) GN=PSAO OS=Arabidopsis thaliana (Mouse-ear cress) PE=1 SV=1	S	Function unknown	unknown [Medicago truncatula]
	F01_transcript/20853	72	62	81	184	248	203	52.2	48.51	56.8	148.27	158.38	150.6	3.1318e-14	1.43853	up	--	--	Cellular Component: plastid (GO:0009536);; Cellular Component: integral component of membrane (GO:0016021);;	K14332|1.11484e-13|bdi:100840579|K14332 photosystem I subunit PsaO | (RefSeq) photosystem I subunit O	ko00195:Photosynthesis	--	--	--	Photosystem I subunit O (Precursor) GN=PSAO OS=Arabidopsis thaliana (Mouse-ear cress) PE=1 SV=1	S	Function unknown	unknown [Medicago truncatula]
	F01_transcript/17186	5364	4556	4380	2441	2490	1909	685.29	645.94	588.65	313.17	287.51	249.96	5.89721e-30	-1.18765	down	--	--	Cellular Component: integral component of membrane (GO:0016021);;	K14332|9.93093e-83|cam:101500027|K14332 photosystem I subunit PsaO | (RefSeq) photosystem I subunit O	ko00195:Photosynthesis	--	--	--	Photosystem I subunit O (Precursor) GN=PSAO OS=Arabidopsis thaliana (Mouse-ear cress) PE=1 SV=1	S	Function unknown	unknown [Medicago truncatula]
	F01_transcript/18132	2672	2314	2540	781	953	719	390.93	375.64	389.82	115.59	125.92	107.86	1.77454e-164	-1.7428	down	--	--	Cellular Component: integral component of membrane (GO:0016021);;	K14332|4.88722e-83|cam:101500027|K14332 photosystem I subunit PsaO | (RefSeq) photosystem I subunit O	ko00195:Photosynthesis	--	--	--	Photosystem I subunit O (Precursor) GN=PSAO OS=Arabidopsis thaliana (Mouse-ear cress) PE=1 SV=1	S	Function unknown	unknown [Medicago truncatula]
	F01_transcript/19162	4851	4087	3855	12	12	2	1079.15	1007.91	889.1	2.85	2.43	0.47	1.12969e-303	-9.08716	down	--	--	Cellular Component: integral component of membrane (GO:0016021);;	K14332|1.82462e-84|cam:101500027|K14332 photosystem I subunit PsaO | (RefSeq) photosystem I subunit O	ko00195:Photosynthesis	--	--	--	Photosystem I subunit O (Precursor) GN=PSAO OS=Arabidopsis thaliana (Mouse-ear cress) PE=1 SV=1	S	Function unknown	unknown [Medicago truncatula]
	F01_transcript/19747	126	95	98	50	53	33	33.82	28.34	27.15	14.1	12.93	9.39	1.85185e-07	-1.3548	down	--	--	Cellular Component: integral component of membrane (GO:0016021);;	K14332|2.49667e-53|cam:101500027|K14332 photosystem I subunit PsaO | (RefSeq) photosystem I subunit O	ko00195:Photosynthesis	--	--	--	Photosystem I subunit O (Precursor) GN=PSAO OS=Arabidopsis thaliana (Mouse-ear cress) PE=1 SV=1	S	Function unknown	unknown [Medicago truncatula]
	F01_transcript/20623	52	53	53	0	1	1	70.77	76.23	65.38	0	1.19	1.39	6.41585e-21	-6.42986	down	--	--	--	K14332|6.59774e-07|bdi:100840579|K14332 photosystem I subunit PsaO | (RefSeq) photosystem I subunit O	ko00195:Photosynthesis	--	--	--	Photosystem I subunit O (Precursor) GN=PSAO OS=Arabidopsis thaliana (Mouse-ear cress) PE=1 SV=1	S	Function unknown	unknown [Medicago truncatula]
C_CK_vs_S_CK (S1)
Component		T13_Count	T14_Count	T15_Count	T19_Count	T20_Count	T21_Count	T13_FPKM	T14_FPKM	T15_FPKM	T19_FPKM	T20_FPKM	T21_FPKM	FDR	log2FC	regulated	COG_class	COG_class_annotation	GO_annotation	KEGG_annotation	KEGG_pathway	KOG_class	KOG_class_annotation	Pfam_annotation	Swissprot_annotation	eggNOG_class	eggNOG_class_annotation	nr_annotation
PsbA	F01_transcript/14235	401	490	507	1750	3710	1917	27.88	37.89	37.44	105.08	241.31	128.76	0.00568794	2.23733	up	--	--	Molecular Function: iron ion binding (GO:0005506);; Cellular Component: photosystem II (GO:0009523);; Cellular Component: chloroplast thylakoid membrane (GO:0009535);; Biological Process: response to herbicide (GO:0009635);; Biological Process: photosynthetic electron transport in photosystem II (GO:0009772);; Molecular Function: oxygen evolving activity (GO:0010242);; Cellular Component: integra…	K02703|6.08668e-143|mtr:MTR_7g021750|K02703 photosystem II P680 reaction center D1 protein [EC:1.10.3.9] | (RefSeq) photosystem II Q(B) protein	ko00195:Photosynthesis	--	--	Photosynthetic reaction centre protein	Photosystem II protein D1 {ECO:0000255|HAMAP-Rule:MF_01379} (Precursor) OS=Medicago sativa (Alfalfa) PE=3 SV=1	C	Energy production and conversion	photosystem II protein D1 (chloroplast) [Macadamia integrifolia]
PsbB	F01_transcript/2102	489	515	496	2060	3855	2294	10.44	12.23	11.32	38.26	77.43	47.27	0.000683271	2.28887	up	[C]	Energy production and conversion	Cellular Component: photosystem II (GO:0009523);; Cellular Component: chloroplast thylakoid membrane (GO:0009535);; Biological Process: photosynthetic electron transport in photosystem II (GO:0009772);; Cellular Component: integral component of membrane (GO:0016021);; Molecular Function: chlorophyll binding (GO:0016168);; Biological Process: protein-chromophore linkage (GO:0018298);; Molecular Fu…	K02704|0|mtr:MTR_4g051370|K02704 photosystem II CP47 chlorophyll apoprotein | (RefSeq) photosystem II CP47 chlorophyll A apoprotein	ko00195:Photosynthesis	--	--	Photosystem II protein;; Cytochrome b/b6/petB;; Cytochrome b(N-terminal)/b6/petB;; Photosystem II 10 kDa phosphoprotein	Photosystem II CP47 reaction center protein {ECO:0000255|HAMAP-Rule:MF_01495} OS=Cicer arietinum (Chickpea) PE=3 SV=1	S	Function unknown	Photosystem II CP47 chlorophyll apoprotein [Medicago truncatula]
PetB	F01_transcript/12457	24	30	18	223	529	268	1.28	1.79	1.01	10.17	26.09	13.65	0.000442926	3.66534	up	[C]	Energy production and conversion	Molecular Function: iron ion binding (GO:0005506);; Cellular Component: cytochrome b6f complex (GO:0009512);; Cellular Component: chloroplast thylakoid membrane (GO:0009535);; Cellular Component: integral component of membrane (GO:0016021);; Molecular Function: oxidoreductase activity (GO:0016491);; Biological Process: photosynthesis, light reaction (GO:0019684);; Molecular Function: heme binding…	K02635|4.45022e-109|cam:6797553|K02635 cytochrome b6 | (RefSeq) petB, CiarC_p049; cytochrome b6	ko00195:Photosynthesis	[C]	Energy production and conversion	Cytochrome b(C-terminal)/b6/petD;; Cytochrome b/b6/petB;; Domain of unknown function (DUF4405)	Cytochrome b6 {ECO:0000255|HAMAP-Rule:MF_00633} OS=Oenothera elata subsp. hookeri (Hooker&apos;s evening primrose) PE=3 SV=2	C	Energy production and conversion	unknown [Medicago truncatula]
	F01_transcript/413	128	109	93	656	1149	653	1.99	1.88	1.56	8.86	16.77	9.78	9.27372e-05	2.73706	up	[C]	Energy production and conversion	Molecular Function: iron ion binding (GO:0005506);; Cellular Component: chloroplast thylakoid membrane (GO:0009535);; Biological Process: photosynthesis (GO:0015979);; Cellular Component: integral component of membrane (GO:0016021);; Molecular Function: oxidoreductase activity (GO:0016491);; Molecular Function: heme binding (GO:0020037);; Biological Process: respiratory electron transport chain (…	K02635|3.69234e-141|cmo:103504414|K02635 cytochrome b6 | (RefSeq) cytochrome b6	ko00195:Photosynthesis	[C]	Energy production and conversion	Cytochrome b/b6/petB;; Cytochrome b(N-terminal)/b6/petB;; Photosystem II protein;; Cytochrome b(C-terminal)/b6/petD;; Photosystem II 10 kDa phosphoprotein	Cytochrome b6 {ECO:0000255|HAMAP-Rule:MF_00633} OS=Oenothera elata subsp. hookeri (Hooker&apos;s evening primrose) PE=3 SV=2	C	Energy production and conversion	PREDICTED: LOW QUALITY PROTEIN: cytochrome b6, partial [Cucumis melo]
PsbH	F01_transcript/16954	18	7	17	129	112	141	2.16	0.99	2.26	13.25	12.47	16.31	1.47742e-22	3.01542	up	--	--	Cellular Component: photosystem II (GO:0009523);; Cellular Component: chloroplast thylakoid membrane (GO:0009535);; Biological Process: photosynthesis (GO:0015979);; Cellular Component: integral component of membrane (GO:0016021);; Molecular Function: phosphate ion binding (GO:0042301);; Biological Process: protein stabilization (GO:0050821);;	K02709|2.9191e-41|mtr:MetrCp030|K02709 photosystem II PsbH protein | (RefSeq) psbH; photosystem II protein H	ko00195:Photosynthesis	--	--	Photosystem II 10 kDa phosphoprotein	Photosystem II reaction center protein H GN=psbH OS=Pisum sativum (Garden pea) PE=3 SV=3	C	Energy production and conversion	photosystem II phosphoprotein (chloroplast) [Medicago truncatula f. tricycla]
PsbO	F01_transcript/14445	1277	1004	1119	5236	4277	4650	103.9	90.72	96.44	367.26	325.11	365.41	1.58309e-185	1.86951	up	--	--	Molecular Function: calcium ion binding (GO:0005509);; Cellular Component: chloroplast thylakoid membrane (GO:0009535);; Cellular Component: photosystem II oxygen evolving complex (GO:0009654);; Cellular Component: integral component of membrane (GO:0016021);; Cellular Component: extrinsic component of membrane (GO:0019898);; Biological Process: photosystem II stabilization (GO:0042549);;	K02716|0|mtr:MTR_5g018670|K02716 photosystem II oxygen-evolving enhancer protein 1 | (RefSeq) photosystem II oxygen-evolving enhancer protein	ko00195:Photosynthesis	--	--	Manganese-stabilising protein / photosystem II polypeptide	Oxygen-evolving enhancer protein 1, chloroplastic (Precursor) GN=PSBO OS=Pisum sativum (Garden pea) PE=2 SV=1	G	Carbohydrate transport and metabolism	Oxygen evolving enhancer protein [Medicago truncatula]
	F01_transcript/13494	8087	7257	7305	2659	2394	2285	498.22	496.52	478.49	141.76	138.19	136.04	5.78895e-178	-1.8153	down	--	--	Molecular Function: calcium ion binding (GO:0005509);; Cellular Component: chloroplast thylakoid membrane (GO:0009535);; Cellular Component: photosystem II oxygen evolving complex (GO:0009654);; Cellular Component: integral component of membrane (GO:0016021);; Cellular Component: extrinsic component of membrane (GO:0019898);; Biological Process: photosystem II stabilization (GO:0042549);;	K02716|0|mtr:MTR_5g018670|K02716 photosystem II oxygen-evolving enhancer protein 1 | (RefSeq) photosystem II oxygen-evolving enhancer protein	ko00195:Photosynthesis	--	--	Manganese-stabilising protein / photosystem II polypeptide	Oxygen-evolving enhancer protein 1, chloroplastic (Precursor) GN=PSBO OS=Pisum sativum (Garden pea) PE=2 SV=1	G	Carbohydrate transport and metabolism	Oxygen evolving enhancer protein [Medicago truncatula]
PsbP	F01_transcript/15420	1086	933	957	183	136	197	93.83	89.54	87.56	13.7	10.99	16.47	3.9141e-173	-2.71984	down	--	--	Molecular Function: calcium ion binding (GO:0005509);; Cellular Component: chloroplast thylakoid membrane (GO:0009535);; Cellular Component: photosystem II oxygen evolving complex (GO:0009654);; Biological Process: photosynthesis (GO:0015979);; Cellular Component: extrinsic component of membrane (GO:0019898);;	K02717|1.90406e-150|cam:101514916|K02717 photosystem II oxygen-evolving enhancer protein 2 | (RefSeq) oxygen-evolving enhancer protein 2, chloroplastic	ko00195:Photosynthesis	--	--	PsbP	Oxygen-evolving enhancer protein 2, chloroplastic (Precursor) GN=PSBP OS=Pisum sativum (Garden pea) PE=1 SV=1	S	Function unknown	unknown [Medicago truncatula]
	F01_transcript/21099	807	734	853	117	116	131	735.29	718.62	731.95	83.64	90.1	112.61	4.6398e-151	-2.90103	down	--	--	Molecular Function: calcium ion binding (GO:0005509);; Cellular Component: chloroplast thylakoid membrane (GO:0009535);; Cellular Component: photosystem II oxygen evolving complex (GO:0009654);; Biological Process: photosynthesis (GO:0015979);; Cellular Component: extrinsic component of membrane (GO:0019898);;	K02717|2.83282e-44|cam:101514916|K02717 photosystem II oxygen-evolving enhancer protein 2 | (RefSeq) oxygen-evolving enhancer protein 2, chloroplastic	ko00195:Photosynthesis	--	--	--	Oxygen-evolving enhancer protein 2, chloroplastic (Precursor) GN=PSBP OS=Pisum sativum (Garden pea) PE=1 SV=1	S	Function unknown	oxygen-evolving enhancer protein 2-1 [Medicago truncatula]
PsbQ	F01_transcript/15600	22307	20942	20590	60888	49403	53426	2083.23	2171.32	2033.94	4896.04	4305.89	4821.51	6.86436e-17	1.1645	up	--	--	Molecular Function: calcium ion binding (GO:0005509);; Cellular Component: photosystem II oxygen evolving complex (GO:0009654);; Biological Process: photosynthesis (GO:0015979);; Cellular Component: extrinsic component of membrane (GO:0019898);;	K08901|1.31713e-116|cam:101495316|K08901 photosystem II oxygen-evolving enhancer protein 3 | (RefSeq) oxygen-evolving enhancer protein 3, chloroplastic-like	ko00195:Photosynthesis	--	--	Oxygen evolving enhancer protein 3 (PsbQ)	Oxygen-evolving enhancer protein 3-2, chloroplastic (Precursor) GN=C17L7.100 OS=Arabidopsis thaliana (Mouse-ear cress) PE=1 SV=2	S	Function unknown	unknown [Medicago truncatula]
	F01_transcript/17850	49	24	38	373	333	272	7.28	3.95	6.01	47.13	45.61	38.83	1.06076e-37	2.96324	up	--	--	Molecular Function: calcium ion binding (GO:0005509);; Cellular Component: photosystem II oxygen evolving complex (GO:0009654);; Biological Process: photosynthesis (GO:0015979);; Cellular Component: extrinsic component of membrane (GO:0019898);;	K08901|2.20564e-71|cam:101513108|K08901 photosystem II oxygen-evolving enhancer protein 3 | (RefSeq) photosynthetic NDH subunit of lumenal location 2, chloroplastic	ko00195:Photosynthesis	--	--	Oxygen evolving enhancer protein 3 (PsbQ)	PsbQ-like protein 1, chloroplastic (Precursor) GN=F7A19.23 OS=Arabidopsis thaliana (Mouse-ear cress) PE=1 SV=1	S	Function unknown	PREDICTED: LOW QUALITY PROTEIN: psbQ-like protein 1, chloroplastic-like [Cicer arietinum]
	F01_transcript/16704	22164	19701	20835	2537	2755	2837	2443.34	2410.83	2423.1	240.3	282.91	302.32	0	-3.12688	down	--	--	Molecular Function: calcium ion binding (GO:0005509);; Cellular Component: photosystem II oxygen evolving complex (GO:0009654);; Biological Process: photosynthesis (GO:0015979);; Cellular Component: extrinsic component of membrane (GO:0019898);;	K08901|2.24749e-117|cam:101495316|K08901 photosystem II oxygen-evolving enhancer protein 3 | (RefSeq) oxygen-evolving enhancer protein 3, chloroplastic-like	ko00195:Photosynthesis	--	--	Oxygen evolving enhancer protein 3 (PsbQ)	Oxygen-evolving enhancer protein 3-2, chloroplastic (Precursor) GN=C17L7.100 OS=Arabidopsis thaliana (Mouse-ear cress) PE=1 SV=2	S	Function unknown	unknown [Medicago truncatula]
	F01_transcript/8383	594	541	568	141	124	122	20.98	21.21	21.39	4.33	4.12	4.17	1.45347e-84	-2.3283	down	--	--	Molecular Function: calcium ion binding (GO:0005509);; Cellular Component: photosystem II oxygen evolving complex (GO:0009654);; Biological Process: photosynthesis (GO:0015979);; Cellular Component: extrinsic component of membrane (GO:0019898);;	K08901|1.21548e-44|cam:101495316|K08901 photosystem II oxygen-evolving enhancer protein 3 | (RefSeq) oxygen-evolving enhancer protein 3, chloroplastic-like	ko00195:Photosynthesis	--	--	Oxygen evolving enhancer protein 3 (PsbQ)	Oxygen-evolving enhancer protein 3-2, chloroplastic (Precursor) GN=C17L7.100 OS=Arabidopsis thaliana (Mouse-ear cress) PE=1 SV=2	S	Function unknown	oxygen-evolving enhancer protein [Medicago truncatula]
PsbR	F01_transcript/21140	11	11	9	185	126	117	9.36	10.05	7.16	119.09	89.19	91.06	2.64954e-27	3.58052	up	--	--	Cellular Component: photosystem II oxygen evolving complex (GO:0009654);; Biological Process: photosynthesis (GO:0015979);; Cellular Component: integral component of membrane (GO:0016021);;	K03541|6.76822e-25|mtr:MTR_2g064650|K03541 photosystem II 10kDa protein | (RefSeq) photosystem II 10 kDa proteinPsbR protein	ko00195:Photosynthesis	--	--	Photosystem II 10 kDa polypeptide PsbR	Photosystem II 10 kDa polypeptide, chloroplastic (Precursor) GN=PSBR OS=Nicotiana tabacum (Common tobacco) PE=2 SV=1	S	Function unknown	Photosystem II 10 kDa polypeptide [Medicago truncatula]
	F01_transcript/18873	31749	28639	29340	2709	1982	2484	7037.92	7037.76	6743.18	507.61	403.92	532.46	0	-3.84069	down	--	--	Cellular Component: photosystem II oxygen evolving complex (GO:0009654);; Biological Process: photosynthesis (GO:0015979);; Cellular Component: integral component of membrane (GO:0016021);;	K03541|5.49525e-70|mtr:MTR_2g064650|K03541 photosystem II 10kDa protein | (RefSeq) photosystem II 10 kDa proteinPsbR protein	ko00195:Photosynthesis	--	--	Photosystem II 10 kDa polypeptide PsbR	Photosystem II 10 kDa polypeptide, chloroplastic (Precursor) GN=PSBR OS=Solanum tuberosum (Potato) PE=2 SV=1	S	Function unknown	Photosystem II 10 kDa polypeptide [Medicago truncatula]
PsbW	F01_transcript/20577	3	10	9	35	26	27	1.97	6.01	4.84	14.78	12	13.52	0.000663904	1.77308	up	--	--	Cellular Component: photosystem II (GO:0009523);; Cellular Component: chloroplast thylakoid membrane (GO:0009535);; Biological Process: photosynthesis (GO:0015979);; Cellular Component: integral component of membrane (GO:0016021);;	K02721|2.22466e-22|cam:101505752|K02721 photosystem II PsbW protein | (RefSeq) photosystem II reaction center W protein, chloroplastic-like	ko00195:Photosynthesis	--	--	Photosystem II reaction centre W protein (PsbW)	Photosystem II reaction center W protein, chloroplastic (Precursor) GN=psbW OS=Spinacia oleracea (Spinach) PE=1 SV=1	S	Function unknown	PREDICTED: photosystem II reaction center W protein, chloroplastic-like [Cicer arietinum]
PetE	F01_transcript/16910	352	289	338	1206	981	942	41.18	37.47	41.69	120.81	106.6	106.34	6.67969e-65	1.48418	up	[C]	Energy production and conversion	Molecular Function: copper ion binding (GO:0005507);; Molecular Function: electron carrier activity (GO:0009055);; Cellular Component: chloroplast thylakoid membrane (GO:0009535);; Cellular Component: integral component of membrane (GO:0016021);; Biological Process: oxidation-reduction process (GO:0055114);;	K02638|2.67661e-93|mtr:MTR_3g114850|K02638 plastocyanin | (RefSeq) plastocyanin	ko00195:Photosynthesis	--	--	Copper binding proteins, plastocyanin/azurin family;; Cupredoxin-like domain	Plastocyanin, chloroplastic (Precursor) GN=PETE OS=Pisum sativum (Garden pea) PE=4 SV=1	C	Energy production and conversion	Plastocyanin [Medicago truncatula]
PetF	F01_transcript/17401	344	215	203	2280	1624	2108	49.41	34.28	30.65	279.25	215.91	292.03	1.87297e-54	2.7943	up	[C]	Energy production and conversion	Molecular Function: protein binding (GO:0005515);; Molecular Function: electron carrier activity (GO:0009055);; Cellular Component: chloroplast (GO:0009507);; Biological Process: electron transport chain (GO:0022900);; Molecular Function: metal ion binding (GO:0046872);; Molecular Function: 2 iron, 2 sulfur cluster binding (GO:0051537);;	K02639|1.73835e-82|mtr:MTR_2g006290|K02639 ferredoxin | (RefSeq) 2Fe-2S ferredoxin superfamily protein	ko00195:Photosynthesis	--	--	2Fe-2S iron-sulfur cluster binding domain	Ferredoxin-1, chloroplastic (Precursor) GN=PETF OS=Pisum sativum (Garden pea) PE=1 SV=2	C	Energy production and conversion	Ferredoxin I [Medicago truncatula]
	F01_transcript/17777	145	177	159	464	361	356	20.68	28.02	23.81	56.58	47.78	49.09	5.08643e-17	1.09126	up	[C]	Energy production and conversion	Molecular Function: electron carrier activity (GO:0009055);; Cellular Component: chloroplast (GO:0009507);; Biological Process: electron transport chain (GO:0022900);; Molecular Function: metal ion binding (GO:0046872);; Molecular Function: 2 iron, 2 sulfur cluster binding (GO:0051537);;	K02639|4.16313e-98|mtr:MTR_5g006320|K02639 ferredoxin | (RefSeq) 2Fe-2S ferredoxin superfamily protein	ko00195:Photosynthesis	--	--	2Fe-2S iron-sulfur cluster binding domain	Ferredoxin-3, chloroplastic (Precursor) GN=FD3 OS=Arabidopsis thaliana (Mouse-ear cress) PE=1 SV=1	C	Energy production and conversion	Ferredoxin [Medicago truncatula]
	F01_transcript/18142	103	102	119	640	623	477	16.66	18.33	20.17	87.93	93.02	74.41	1.00051e-20	2.23443	up	[C]	Energy production and conversion	Molecular Function: electron carrier activity (GO:0009055);; Biological Process: electron transport chain (GO:0022900);; Molecular Function: metal ion binding (GO:0046872);; Molecular Function: 2 iron, 2 sulfur cluster binding (GO:0051537);;	K02639|2.08001e-97|mtr:MTR_8g088720|K02639 ferredoxin | (RefSeq) 2Fe-2S ferredoxin superfamily protein	ko00195:Photosynthesis	--	--	2Fe-2S iron-sulfur cluster binding domain	Ferredoxin-1, chloroplastic (Precursor) GN=SEND33 OS=Solanum lycopersicum (Tomato) PE=2 SV=1	C	Energy production and conversion	Ferredoxin I [Medicago truncatula]
	F01_transcript/18206	1085	994	912	3964	2862	3588	189.28	192.3	166.13	588.12	461.22	604.85	5.99042e-39	1.60275	up	[C]	Energy production and conversion	Molecular Function: electron carrier activity (GO:0009055);; Biological Process: electron transport chain (GO:0022900);; Molecular Function: metal ion binding (GO:0046872);; Molecular Function: 2 iron, 2 sulfur cluster binding (GO:0051537);;	K02639|1.428e-97|mtr:MTR_8g088720|K02639 ferredoxin | (RefSeq) 2Fe-2S ferredoxin superfamily protein	ko00195:Photosynthesis	--	--	2Fe-2S iron-sulfur cluster binding domain	Ferredoxin-1, chloroplastic (Precursor) GN=SEND33 OS=Solanum lycopersicum (Tomato) PE=2 SV=1	C	Energy production and conversion	Ferredoxin I [Medicago truncatula]
	F01_transcript/16645	340	314	302	152	134	186	37.7	38.66	35.27	14.46	13.88	19.96	2.1152e-18	-1.20486	down	[C]	Energy production and conversion	Molecular Function: electron carrier activity (GO:0009055);; Cellular Component: chloroplast (GO:0009507);; Biological Process: electron transport chain (GO:0022900);; Molecular Function: metal ion binding (GO:0046872);; Molecular Function: 2 iron, 2 sulfur cluster binding (GO:0051537);;	K02639|1.07578e-124|mtr:MTR_4g098490|K02639 ferredoxin | (RefSeq) 2Fe-2S ferredoxin superfamily protein	ko00195:Photosynthesis	--	--	2Fe-2S iron-sulfur cluster binding domain	Ferredoxin-A OS=Alocasia macrorrhizos (Giant taro) PE=1 SV=1	C	Energy production and conversion	Ferredoxin-6 [Medicago truncatula]
PetH	F01_transcript/11279	157	141	177	587	444	447	7.15	7.16	8.61	23.22	19.01	19.69	8.72019e-32	1.4398	up	[P]	Inorganic ion transport and metabolism	Molecular Function: ferredoxin-NADP+ reductase activity (GO:0004324);; Molecular Function: protein binding (GO:0005515);; Molecular Function: poly(U) RNA binding (GO:0008266);; Cellular Component: chloroplast thylakoid membrane (GO:0009535);; Cellular Component: chloroplast stroma (GO:0009570);; Biological Process: photosynthetic electron transport chain (GO:0009767);; Cellular Component: chlorop…	K02641|2.56266e-162|mtr:MTR_5g022300|K02641 ferredoxin--NADP+ reductase [EC:1.18.1.2] | (RefSeq) leaf ferredoxin-NADP reductase	ko00195:Photosynthesis	[C]	Energy production and conversion	Oxidoreductase NAD-binding domain;; Oxidoreductase FAD-binding domain;; Oxidoreductase NAD-binding domain	Ferredoxin--NADP reductase, chloroplastic (Precursor) GN=PETH OS=Vicia faba (Broad bean) PE=2 SV=1	P	Inorganic ion transport and metabolism	leaf ferredoxin-NADP reductase [Medicago truncatula]
	F01_transcript/13104	0	13	0	55	27	57	0	0.86	0	2.73	1.47	3.18	4.21963e-06	3.13186	up	[P]	Inorganic ion transport and metabolism	Molecular Function: ferredoxin-NADP+ reductase activity (GO:0004324);; Molecular Function: protein binding (GO:0005515);; Molecular Function: poly(U) RNA binding (GO:0008266);; Cellular Component: chloroplast thylakoid membrane (GO:0009535);; Cellular Component: chloroplast stroma (GO:0009570);; Biological Process: photosynthetic electron transport chain (GO:0009767);; Cellular Component: chlorop…	K02641|0|mtr:MTR_5g022300|K02641 ferredoxin--NADP+ reductase [EC:1.18.1.2] | (RefSeq) leaf ferredoxin-NADP reductase	ko00195:Photosynthesis	[C]	Energy production and conversion	Oxidoreductase NAD-binding domain;; Oxidoreductase FAD-binding domain	Ferredoxin--NADP reductase, chloroplastic (Precursor) GN=PETH OS=Vicia faba (Broad bean) PE=2 SV=1	P	Inorganic ion transport and metabolism	Ferredoxin-NADP reductase [Medicago truncatula]
	F01_transcript/12300	625	541	658	10	37	15	31.49	30.3	35.32	0.46	1.79	0.74	1.28887e-169	-5.01213	down	[P]	Inorganic ion transport and metabolism	Molecular Function: nucleotide binding (GO:0000166);; Molecular Function: ferredoxin-NADP+ reductase activity (GO:0004324);; Molecular Function: protein binding (GO:0005515);; Molecular Function: poly(U) RNA binding (GO:0008266);; Cellular Component: chloroplast thylakoid membrane (GO:0009535);; Cellular Component: chloroplast stroma (GO:0009570);; Biological Process: photosynthetic electron tran…	K02641|0|mtr:MTR_5g022300|K02641 ferredoxin--NADP+ reductase [EC:1.18.1.2] | (RefSeq) leaf ferredoxin-NADP reductase	ko00195:Photosynthesis	[C]	Energy production and conversion	Oxidoreductase NAD-binding domain;; Oxidoreductase FAD-binding domain	Ferredoxin--NADP reductase, leaf isozyme, chloroplastic (Precursor) GN=PETH OS=Pisum sativum (Garden pea) PE=1 SV=1	P	Inorganic ion transport and metabolism	Ferredoxin-NADP reductase [Medicago truncatula]
PsbY	F01_transcript/17147	1261	1117	1136	3663	3067	3233	159.27	156.49	150.91	396.19	359.95	394.5	4.52458e-94	1.31209	up	--	--	Cellular Component: photosystem II (GO:0009523);; Biological Process: photosynthesis (GO:0015979);; Cellular Component: integral component of membrane (GO:0016021);; Molecular Function: manganese ion binding (GO:0030145);;	K02723|6.8244e-51|cam:101506330|K02723 photosystem II PsbY protein | (RefSeq) photosystem II core complex proteins psbY, chloroplastic-like	ko00195:Photosynthesis	--	--	Photosystem II protein Y (PsbY)	Photosystem II protein psbY-2, chloroplastic (Precursor) GN=PSBY OS=Spinacia oleracea (Spinach) PE=1 SV=2	I	Lipid transport and metabolism	unknown [Medicago truncatula]
	F01_transcript/20767	426	387	412	1504	1246	1180	226.72	225.45	216.65	647.71	586.4	600.47	2.20252e-70	1.48775	up	--	--	Cellular Component: photosystem II (GO:0009523);; Biological Process: photosynthesis (GO:0015979);; Cellular Component: integral component of membrane (GO:0016021);; Molecular Function: manganese ion binding (GO:0030145);;	K02723|1.82828e-44|mtr:MTR_3g086230|K02723 photosystem II PsbY protein | (RefSeq) photosystem II core complex family psbY protein	ko00195:Photosynthesis	--	--	Photosystem II protein Y (PsbY)	Photosystem II protein psbY-2, chloroplastic (Precursor) GN=PSBY OS=Spinacia oleracea (Spinach) PE=1 SV=2	I	Lipid transport and metabolism	unknown [Medicago truncatula]
Psb27	F01_transcript/17189	165	95	140	2040	1907	1569	20.39	13.07	18.29	216.11	219.13	187.38	4.49683e-60	3.60775	up	--	--	Cellular Component: chloroplast thylakoid lumen (GO:0009543);; Biological Process: photosystem II repair (GO:0010206);; Biological Process: photosystem II assembly (GO:0010207);;	K08902|5.02003e-74|cam:101500783|K08902 photosystem II Psb27 protein | (RefSeq) photosystem II repair protein PSB27-H1, chloroplastic	ko00195:Photosynthesis	--	--	Photosystem II Pbs27	Photosystem II repair protein PSB27-H1, chloroplastic (Precursor) OS=Arabidopsis thaliana (Mouse-ear cress) PE=1 SV=1	G	Carbohydrate transport and metabolism	photosystem II Pbs27 protein [Medicago truncatula]
	F01_transcript/17811	678	648	826	2387	1940	2155	94.41	100.16	120.85	284.29	250.8	290.09	4.78258e-81	1.39611	up	--	--	Cellular Component: chloroplast thylakoid lumen (GO:0009543);; Biological Process: photosystem II repair (GO:0010206);; Biological Process: photosystem II assembly (GO:0010207);;	K08902|5.73061e-75|cam:101500783|K08902 photosystem II Psb27 protein | (RefSeq) photosystem II repair protein PSB27-H1, chloroplastic	ko00195:Photosynthesis	--	--	Photosystem II Pbs27	Photosystem II repair protein PSB27-H1, chloroplastic (Precursor) OS=Arabidopsis thaliana (Mouse-ear cress) PE=1 SV=1	G	Carbohydrate transport and metabolism	photosystem II Pbs27 protein [Medicago truncatula]
	F01_transcript/17718	673	657	671	294	306	261	102.51	111.02	107.16	38.24	43.25	38.51	2.29206e-46	-1.40241	down	--	--	Cellular Component: chloroplast thylakoid lumen (GO:0009543);; Biological Process: photosystem II repair (GO:0010206);; Biological Process: photosystem II assembly (GO:0010207);;	K08902|4.7607e-76|cam:101500783|K08902 photosystem II Psb27 protein | (RefSeq) photosystem II repair protein PSB27-H1, chloroplastic	ko00195:Photosynthesis	--	--	Photosystem II Pbs27	Photosystem II repair protein PSB27-H1, chloroplastic (Precursor) OS=Arabidopsis thaliana (Mouse-ear cress) PE=1 SV=1	G	Carbohydrate transport and metabolism	photosystem II Pbs27 protein [Medicago truncatula]
Psb28	F01_transcript/17017	578	497	535	1586	1303	1308	70.44	67.22	68.65	165.72	147.69	154.06	1.57654e-56	1.19011	up	[S]	Function unknown	Cellular Component: photosystem II oxygen evolving complex (GO:0009654);; Biological Process: photosynthesis (GO:0015979);;	K08903|2.9469e-115|cam:101515210|K08903 photosystem II 13kDa protein | (RefSeq) photosystem II reaction center PSB28 protein, chloroplastic	ko00195:Photosynthesis	--	--	Psb28 protein	Photosystem II reaction center PSB28 protein, chloroplastic (Precursor) GN=P0504E02.24 OS=Oryza sativa subsp. japonica (Rice) PE=2 SV=2	H	Coenzyme transport and metabolism	photosystem II reaction center Psb28 protein [Medicago truncatula]
PsaA	F01_transcript/333	844	1010	932	3861	5688	3720	12.87	17.1	15.21	51.24	81.63	54.74	1.40245e-05	2.07498	up	[M]	Cell wall/membrane/envelope biogenesis	Molecular Function: magnesium ion binding (GO:0000287);; Molecular Function: electron carrier activity (GO:0009055);; Cellular Component: photosystem I (GO:0009522);; Cellular Component: chloroplast thylakoid membrane (GO:0009535);; Biological Process: photosynthesis (GO:0015979);; Cellular Component: integral component of membrane (GO:0016021);; Molecular Function: chlorophyll binding (GO:001616…	K02689|0|mtr:MetrCp066|K02689 photosystem I P700 chlorophyll a apoprotein A1 | (RefSeq) psaA; photosystem I P700 chlorophyll a apoprotein A1	ko00195:Photosynthesis	--	--	Photosystem I psaA/psaB protein;; Photosystem I psaA/psaB protein;; Photosystem I psaA/psaB protein;; Ribosomal protein S14p/S29e	Photosystem I P700 chlorophyll a apoprotein A1 {ECO:0000255|HAMAP-Rule:MF_00458} GN=CsCp034 OS=Cucumis sativus (Cucumber) PE=3 SV=1	C	Energy production and conversion	photosystem I P700 apoprotein A1 [Medicago truncatula]
PsaB	F01_transcript/5145	0	100	24	223	325	177	0	3.08	0.71	5.37	8.47	4.75	0.000954879	2.31088	up	[M]	Cell wall/membrane/envelope biogenesis	Molecular Function: magnesium ion binding (GO:0000287);; Molecular Function: electron carrier activity (GO:0009055);; Cellular Component: photosystem I (GO:0009522);; Cellular Component: chloroplast thylakoid membrane (GO:0009535);; Biological Process: photosynthesis (GO:0015979);; Cellular Component: integral component of membrane (GO:0016021);; Molecular Function: chlorophyll binding (GO:001616…	K02690|0|mtr:MTR_3g035600|K02690 photosystem I P700 chlorophyll a apoprotein A2 | (RefSeq) photosystem I P700 chlorophyll A apoprotein A2	ko00195:Photosynthesis	--	--	Photosystem I psaA/psaB protein;; Ribosomal protein S14p/S29e;; Photosystem I psaA/psaB protein	Photosystem I P700 chlorophyll a apoprotein A2 {ECO:0000255|HAMAP-Rule:MF_00482} OS=Lotus japonicus (Lotus corniculatus var. japonicus) PE=3 SV=1	C	Energy production and conversion	photosystem I P700 chlorophyll A apoprotein A2 [Medicago truncatula]
PsaD	F01_transcript/19621	1565	1405	1675	426	410	433	428.62	426.24	471.93	97.86	102.73	114.77	1.65921e-78	-2.05737	down	--	--	Cellular Component: chloroplast thylakoid membrane (GO:0009535);; Cellular Component: photosystem I reaction center (GO:0009538);; Biological Process: photosynthesis (GO:0015979);;	K02692|1.23455e-80|mtr:MTR_5g006130|K02692 photosystem I subunit II | (RefSeq) photosystem I reaction center subunit II	ko00195:Photosynthesis	--	--	PsaD	Photosystem I reaction center subunit II, chloroplastic (Precursor) GN=psaD OS=Cucumis sativus (Cucumber) PE=1 SV=1	C	Energy production and conversion	Photosystem I reaction center subunit II [Medicago truncatula]
PsaE	F01_transcript/19283	2704	2449	2720	6909	5995	6398	603.7	606.15	629.58	1303.03	1230.02	1380.83	5.24915e-70	1.10348	up	--	--	Cellular Component: chloroplast (GO:0009507);; Cellular Component: photosystem I reaction center (GO:0009538);; Biological Process: photosynthesis (GO:0015979);;	K02693|1.82115e-51|cam:101507899|K02693 photosystem I subunit IV | (RefSeq) photosystem I reaction center subunit IV A, chloroplastic-like	ko00195:Photosynthesis	--	--	Photosystem I reaction centre subunit IV / PsaE	Photosystem I reaction center subunit IV A isoform 2 (Precursor) GN=PSAEA OS=Nicotiana sylvestris (Wood tobacco) PE=1 SV=1	C	Energy production and conversion	PREDICTED: photosystem I reaction center subunit IV A, chloroplastic-like [Cicer arietinum]
PsaF	F01_transcript/15487	4126	3679	3866	40256	34256	34842	359.49	355.84	356.63	3022.35	2787.22	2932.97	5.23089e-202	3.03674	up	--	--	Cellular Component: plastid (GO:0009536);; Cellular Component: photosystem I reaction center (GO:0009538);; Biological Process: photosynthesis (GO:0015979);; Cellular Component: integral component of membrane (GO:0016021);;	K02694|9.91521e-126|cam:101506661|K02694 photosystem I subunit III | (RefSeq) photosystem I reaction center subunit III, chloroplastic	ko00195:Photosynthesis	--	--	Photosystem I reaction centre subunit III	Photosystem I reaction center subunit III, chloroplastic (Precursor) GN=PSAF OS=Arabidopsis thaliana (Mouse-ear cress) PE=1 SV=1	S	Function unknown	unknown [Medicago truncatula]
	F01_transcript/16057	719	713	858	8447	8063	7463	68.72	75.68	86.67	694.35	718.43	688.71	4.26969e-134	3.1982	up	--	--	Cellular Component: plastid (GO:0009536);; Cellular Component: photosystem I reaction center (GO:0009538);; Biological Process: photosynthesis (GO:0015979);; Cellular Component: integral component of membrane (GO:0016021);;	K02694|5.71879e-95|cam:101506661|K02694 photosystem I subunit III | (RefSeq) photosystem I reaction center subunit III, chloroplastic	ko00195:Photosynthesis	--	--	Photosystem I reaction centre subunit III	Photosystem I reaction center subunit III, chloroplastic (Precursor) GN=PSAF OS=Flaveria trinervia (Clustered yellowtops) PE=2 SV=1	S	Function unknown	unknown [Medicago truncatula]
	F01_transcript/16943	10584	9624	9617	28813	23575	25033	1233.11	1244.53	1180.81	2880.47	2556.3	2818.73	1.15348e-39	1.18307	up	--	--	Cellular Component: plastid (GO:0009536);; Cellular Component: photosystem I reaction center (GO:0009538);; Biological Process: photosynthesis (GO:0015979);; Cellular Component: integral component of membrane (GO:0016021);;	K02694|3.30479e-128|cam:101506661|K02694 photosystem I subunit III | (RefSeq) photosystem I reaction center subunit III, chloroplastic	ko00195:Photosynthesis	--	--	Photosystem I reaction centre subunit III	Photosystem I reaction center subunit III, chloroplastic (Precursor) GN=PSAF OS=Arabidopsis thaliana (Mouse-ear cress) PE=1 SV=1	S	Function unknown	unknown [Medicago truncatula]
	F01_transcript/15408	34710	30964	33481	14601	12495	12788	2999.06	2970.48	3063.43	1087.41	1008.51	1067.77	4.01179e-45	-1.50486	down	--	--	Cellular Component: plastid (GO:0009536);; Cellular Component: photosystem I reaction center (GO:0009538);; Biological Process: photosynthesis (GO:0015979);; Cellular Component: integral component of membrane (GO:0016021);;	K02694|2.18088e-126|cam:101506661|K02694 photosystem I subunit III | (RefSeq) photosystem I reaction center subunit III, chloroplastic	ko00195:Photosynthesis	--	--	Photosystem I reaction centre subunit III	Photosystem I reaction center subunit III, chloroplastic (Precursor) GN=PSAF OS=Arabidopsis thaliana (Mouse-ear cress) PE=1 SV=1	S	Function unknown	unknown [Medicago truncatula]
	F01_transcript/15536	10420	9584	9839	4758	3975	3803	911.54	930.84	911.26	358.73	324.75	321.48	4.82347e-108	-1.44505	down	--	--	Cellular Component: plastid (GO:0009536);; Cellular Component: photosystem I reaction center (GO:0009538);; Biological Process: photosynthesis (GO:0015979);; Cellular Component: integral component of membrane (GO:0016021);;	K02694|2.05773e-94|cam:101506661|K02694 photosystem I subunit III | (RefSeq) photosystem I reaction center subunit III, chloroplastic	ko00195:Photosynthesis	--	--	Photosystem I reaction centre subunit III	Photosystem I reaction center subunit III, chloroplastic (Precursor) GN=PSAF OS=Flaveria trinervia (Clustered yellowtops) PE=2 SV=1	S	Function unknown	unknown [Medicago truncatula]
	F01_transcript/16432	13500	11908	12579	540	368	460	1433.56	1403.69	1410.09	49.29	36.46	47.26	0	-4.99452	down	--	--	Cellular Component: plastid (GO:0009536);; Cellular Component: photosystem I reaction center (GO:0009538);; Biological Process: photosynthesis (GO:0015979);; Cellular Component: integral component of membrane (GO:0016021);;	K02694|5.22106e-127|cam:101506661|K02694 photosystem I subunit III | (RefSeq) photosystem I reaction center subunit III, chloroplastic	ko00195:Photosynthesis	--	--	Photosystem I reaction centre subunit III	Photosystem I reaction center subunit III, chloroplastic (Precursor) GN=PSAF OS=Arabidopsis thaliana (Mouse-ear cress) PE=1 SV=1	S	Function unknown	unknown [Medicago truncatula]
	F01_transcript/16550	2667	2190	2666	270	217	276	294.57	268.56	310.68	25.66	22.32	29.47	1.50345e-165	-3.49079	down	--	--	Cellular Component: plastid (GO:0009536);; Cellular Component: photosystem I reaction center (GO:0009538);; Biological Process: photosynthesis (GO:0015979);; Cellular Component: integral component of membrane (GO:0016021);;	K02694|4.78987e-128|cam:101506661|K02694 photosystem I subunit III | (RefSeq) photosystem I reaction center subunit III, chloroplastic	ko00195:Photosynthesis	--	--	Photosystem I reaction centre subunit III	Photosystem I reaction center subunit III, chloroplastic (Precursor) GN=PSAF OS=Arabidopsis thaliana (Mouse-ear cress) PE=1 SV=1	S	Function unknown	unknown [Medicago truncatula]
beta	F01_transcript/5015	36	60	42	272	551	262	1.03	1.9	1.28	6.72	14.74	7.21	0.00168602	2.80212	up	[C]	Energy production and conversion	Molecular Function: ATP binding (GO:0005524);; Cellular Component: plasma membrane (GO:0005886);; Cellular Component: chloroplast thylakoid membrane (GO:0009535);; Biological Process: ATP synthesis coupled proton transport (GO:0015986);; Biological Process: ATP hydrolysis coupled proton transport (GO:0015991);; Cellular Component: integral component of membrane (GO:0016021);; Cellular Component: …	K02112|0|mtr:MetrCp073|K02112 F-type H+-transporting ATPase subunit beta [EC:3.6.3.14] | (RefSeq) atpB; ATP synthase CF1 beta subunit	ko00190:Oxidative phosphorylation;ko00195:Photosynthesis	[C]	Energy production and conversion	ATP synthase alpha/beta family, nucleotide-binding domain;; ATP synthase alpha/beta family, beta-barrel domain;; ATPase family associated with various cellular activities (AAA);; ATP synthase, Delta/Epsilon chain, beta-sandwich domain;; ATP synthase, Delta/Epsilon chain, long alpha-helix domain	ATP synthase subunit beta, chloroplastic {ECO:0000255|HAMAP-Rule:MF_01347} OS=Medicago sativa (Alfalfa) PE=3 SV=1	C	Energy production and conversion	RecName: Full=ATP synthase subunit beta, chloroplastic; AltName: Full=ATP synthase F1 sector subunit beta; AltName: Full=F-ATPase subunit beta (chloroplast) [Medicago sativa]
	F01_transcript/8045	85	100	64	442	717	507	2.88	3.76	2.34	12.98	22.81	16.57	2.31381e-06	2.5701	up	[C]	Energy production and conversion	Molecular Function: ATP binding (GO:0005524);; Cellular Component: plasma membrane (GO:0005886);; Cellular Component: chloroplast thylakoid membrane (GO:0009535);; Biological Process: ATP synthesis coupled proton transport (GO:0015986);; Biological Process: ATP hydrolysis coupled proton transport (GO:0015991);; Cellular Component: integral component of membrane (GO:0016021);; Cellular Component: …	K02112|0|mtr:MetrCp073|K02112 F-type H+-transporting ATPase subunit beta [EC:3.6.3.14] | (RefSeq) atpB; ATP synthase CF1 beta subunit	ko00190:Oxidative phosphorylation;ko00195:Photosynthesis	[C]	Energy production and conversion	ATP synthase alpha/beta family, nucleotide-binding domain;; ATP synthase alpha/beta family, beta-barrel domain;; ATPase family associated with various cellular activities (AAA);; ATP synthase, Delta/Epsilon chain, beta-sandwich domain;; ATP synthase, Delta/Epsilon chain, long alpha-helix domain	ATP synthase subunit beta, chloroplastic {ECO:0000255|HAMAP-Rule:MF_01347} OS=Medicago sativa (Alfalfa) PE=3 SV=1	C	Energy production and conversion	RecName: Full=ATP synthase subunit beta, chloroplastic; AltName: Full=ATP synthase F1 sector subunit beta; AltName: Full=F-ATPase subunit beta (chloroplast) [Medicago sativa]
alpha	F01_transcript/1971	100	97	75	570	709	507	2.12	2.28	1.69	10.43	14.04	10.3	1.66828e-11	2.53694	up	[C]	Energy production and conversion	Molecular Function: ATP binding (GO:0005524);; Cellular Component: plasma membrane (GO:0005886);; Cellular Component: chloroplast thylakoid membrane (GO:0009535);; Biological Process: ATP synthesis coupled proton transport (GO:0015986);; Biological Process: ATP hydrolysis coupled proton transport (GO:0015991);; Cellular Component: proton-transporting ATP synthase complex, catalytic core F(1) (GO:…	K02111|0|cam:6797510|K02111 F-type H+-transporting ATPase subunit alpha [EC:3.6.3.14] | (RefSeq) atpA, CiarC_p026; ATP synthase CF1 alpha subunit	ko00190:Oxidative phosphorylation;ko00195:Photosynthesis	[C]	Energy production and conversion	ATP synthase alpha/beta family, nucleotide-binding domain;; ATP synthase alpha/beta chain, C terminal domain;; ATP synthase alpha/beta family, beta-barrel domain	ATP synthase subunit alpha, chloroplastic {ECO:0000255|HAMAP-Rule:MF_01346} OS=Lotus japonicus (Lotus corniculatus var. japonicus) PE=3 SV=1	C	Energy production and conversion	ATP synthase CF1 alpha subunit (chloroplast) [Medicago truncatula f. tricycla]
	F01_transcript/2407	1535	1344	1489	676	477	564	32.72	31.82	33.96	12.54	9.57	11.61	1.31855e-98	-1.54523	down	[O]	Posttranslational modification, protein turnover, chaperones	Molecular Function: serine-type endopeptidase activity (GO:0004252);; Cellular Component: cell wall (GO:0005618);; Biological Process: proteolysis (GO:0006508);; Cellular Component: integral component of membrane (GO:0016021);;	--	--	--	--	Subtilase family;; 1,3-beta-glucan synthase subunit FKS1, domain-1	Callose synthase 5 OS=Arabidopsis thaliana (Mouse-ear cress) PE=1 SV=1	--	--	Serine protease aprX [Medicago truncatula]
b	F01_transcript/15911	1346	1310	1356	4419	3815	3586	131.13	141.69	139.64	370.43	346.62	337.53	6.91025e-71	1.36495	up	[C]	Energy production and conversion	Molecular Function: ATP binding (GO:0005524);; Cellular Component: chloroplast thylakoid membrane (GO:0009535);; Biological Process: response to cytokinin (GO:0009735);; Cellular Component: chloroplast envelope (GO:0009941);; Molecular Function: hydrogen ion transmembrane transporter activity (GO:0015078);; Biological Process: ATP synthesis coupled proton transport (GO:0015986);; Cellular Compone…	K02109|7.37299e-137|mtr:MTR_3g106820|K02109 F-type H+-transporting ATPase subunit b | (RefSeq) ATP synthase, F0 subunit B	ko00190:Oxidative phosphorylation;ko00195:Photosynthesis	--	--	ATP synthase B/B' CF(0)	ATP synthase subunit b&apos;, chloroplastic (Precursor) GN=ATPG OS=Spinacia oleracea (Spinach) PE=1 SV=2	U	Intracellular trafficking, secretion, and vesicular transport	ATP synthase [Medicago truncatula]
PsaK	F01_transcript/19016	783	661	720	274	178	236	173.67	162.46	165.58	51.41	36.46	50.58	2.88751e-75	-1.85265	down	--	--	Cellular Component: photosystem I (GO:0009522);; Cellular Component: chloroplast thylakoid membrane (GO:0009535);; Biological Process: photosynthesis (GO:0015979);; Cellular Component: integral component of membrane (GO:0016021);; Molecular Function: chlorophyll binding (GO:0016168);;	K02698|9.65271e-67|cam:101506632|K02698 photosystem I subunit X | (RefSeq) photosystem I reaction center subunit psaK, chloroplastic	ko00195:Photosynthesis	--	--	Photosystem I psaG / psaK	Photosystem I reaction center subunit psaK, chloroplastic (Precursor) GN=PSAK OS=Medicago sativa (Alfalfa) PE=2 SV=1	S	Function unknown	RecName: Full=Photosystem I reaction center subunit psaK, chloroplastic; AltName: Full=PSI-K; AltName: Full=Photosystem I subunit X; Flags: Precursor [Medicago sativa]
	F01_transcript/19199	875	829	898	407	264	304	197.44	207.38	209.99	77.64	54.72	66.41	1.1969e-71	-1.6211	down	--	--	Cellular Component: photosystem I (GO:0009522);; Cellular Component: chloroplast thylakoid membrane (GO:0009535);; Biological Process: photosynthesis (GO:0015979);; Cellular Component: integral component of membrane (GO:0016021);; Molecular Function: chlorophyll binding (GO:0016168);;	K02698|2.62177e-69|cam:101506632|K02698 photosystem I subunit X | (RefSeq) photosystem I reaction center subunit psaK, chloroplastic	ko00195:Photosynthesis	--	--	Photosystem I psaG / psaK	Photosystem I reaction center subunit psaK, chloroplastic (Precursor) GN=PSAK OS=Medicago sativa (Alfalfa) PE=2 SV=1	S	Function unknown	unknown [Medicago truncatula]
PsaL	F01_transcript/16196	11329	10102	11378	5402	4066	5064	1160.32	1148.63	1230.91	475.83	388.31	501.26	3.54144e-93	-1.36962	down	--	--	Cellular Component: plastid (GO:0009536);; Cellular Component: photosystem I reaction center (GO:0009538);; Biological Process: photosynthesis (GO:0015979);; Cellular Component: integral component of membrane (GO:0016021);;	K02699|2.52026e-125|mtr:MTR_7g079900|K02699 photosystem I subunit XI | (RefSeq) photosystem I reaction center subunit XI	ko00195:Photosynthesis	--	--	Photosystem I reaction centre subunit XI	Photosystem I reaction center subunit XI, chloroplastic (Precursor) GN=PSAL OS=Arabidopsis thaliana (Mouse-ear cress) PE=1 SV=2	C	Energy production and conversion	Photosystem I reaction center subunit XI [Medicago truncatula]
	F01_transcript/19553	676	631	770	25	16	26	166.19	171.67	195.3	5.28	3.81	6.26	8.39923e-118	-5.15394	down	--	--	Molecular Function: protein binding (GO:0005515);; Cellular Component: chloroplast thylakoid membrane (GO:0009535);; Cellular Component: photosystem I reaction center (GO:0009538);; Cellular Component: plastoglobule (GO:0010287);; Cellular Component: integral component of membrane (GO:0016021);; Biological Process: photosynthesis, light reaction (GO:0019684);; Cellular Component: chloroplast memb…	K02699|2.12022e-40|mtr:MTR_7g079900|K02699 photosystem I subunit XI | (RefSeq) photosystem I reaction center subunit XI	ko00195:Photosynthesis	--	--	Photosystem I reaction centre subunit XI	Photosystem I reaction center subunit XI, chloroplastic (Precursor) GN=PSAL OS=Arabidopsis thaliana (Mouse-ear cress) PE=1 SV=2	C	Energy production and conversion	photosystem I subunit XI Mrna (chloroplast) [Solanum tuberosum]
PsaN	F01_transcript/17164	4452	3931	4001	24519	20075	21617	568.74	557.36	537.8	2683.31	2383.71	2669.09	3.58721e-173	2.22648	up	--	--	Cellular Component: photosystem I (GO:0009522);; Biological Process: photosynthesis (GO:0015979);;	K02701|1.16724e-100|mtr:MTR_3g095540|K02701 photosystem I subunit PsaN | (RefSeq) photosystem I reaction center subunit N	ko00195:Photosynthesis	--	--	Photosystem I reaction centre subunit N (PSAN or PSI-N)	Photosystem I reaction center subunit N, chloroplastic (Precursor) GN=PSAN OS=Arabidopsis thaliana (Mouse-ear cress) PE=1 SV=2	S	Function unknown	Photosystem I reaction center subunit N [Medicago truncatula]
	F01_transcript/17947	6991	6333	6810	2190	1689	1514	1054.04	1059.53	1076.46	282.04	236.11	220.78	1.01127e-232	-2.09873	down	--	--	Cellular Component: photosystem I (GO:0009522);; Biological Process: photosynthesis (GO:0015979);;	K02701|4.45848e-101|mtr:MTR_3g095540|K02701 photosystem I subunit PsaN | (RefSeq) photosystem I reaction center subunit N	ko00195:Photosynthesis	--	--	Photosystem I reaction centre subunit N (PSAN or PSI-N)	Photosystem I reaction center subunit N, chloroplastic (Precursor) GN=PSAN OS=Arabidopsis thaliana (Mouse-ear cress) PE=1 SV=2	S	Function unknown	Photosystem I reaction center subunit N [Medicago truncatula]
PsaO	F01_transcript/18364	4267	3721	3738	11290	8626	9633	728.01	704.23	666.44	1639.79	1360.99	1588.75	6.61628e-71	1.13873	up	--	--	Cellular Component: integral component of membrane (GO:0016021);;	K14332|5.36933e-84|cam:101500027|K14332 photosystem I subunit PsaO | (RefSeq) photosystem I subunit O	ko00195:Photosynthesis	--	--	--	Photosystem I subunit O (Precursor) GN=PSAO OS=Arabidopsis thaliana (Mouse-ear cress) PE=1 SV=1	S	Function unknown	unknown [Medicago truncatula]
	F01_transcript/19919	27	26	37	124	111	126	7.75	8.27	10.81	28.99	28.23	34.03	2.03424e-11	1.8139	up	--	--	Cellular Component: chloroplast (GO:0009507);; Cellular Component: integral component of membrane (GO:0016021);;	K14332|4.19344e-44|cam:101500027|K14332 photosystem I subunit PsaO | (RefSeq) photosystem I subunit O	ko00195:Photosynthesis	--	--	--	Photosystem I subunit O (Precursor) GN=PSAO OS=Arabidopsis thaliana (Mouse-ear cress) PE=1 SV=1	S	Function unknown	unknown [Medicago truncatula]
	F01_transcript/21357	3	3	13	99	57	90	4.17	4.43	16.45	102.04	64.83	113.75	4.91695e-16	3.48604	up	--	--	--	K14332|6.59774e-07|bdi:100840579|K14332 photosystem I subunit PsaO | (RefSeq) photosystem I subunit O	ko00195:Photosynthesis	--	--	--	Photosystem I subunit O (Precursor) GN=PSAO OS=Arabidopsis thaliana (Mouse-ear cress) PE=1 SV=1	S	Function unknown	unknown [Medicago truncatula]
	F01_transcript/18286	4376	3962	4149	1918	1464	1551	696.09	699.29	691.1	260.31	215.77	238.56	1.25987e-130	-1.53647	down	--	--	Cellular Component: integral component of membrane (GO:0016021);;	K14332|7.45777e-84|cam:101500027|K14332 photosystem I subunit PsaO | (RefSeq) photosystem I subunit O	ko00195:Photosynthesis	--	--	--	Photosystem I subunit O (Precursor) GN=PSAO OS=Arabidopsis thaliana (Mouse-ear cress) PE=1 SV=1	S	Function unknown	unknown [Medicago truncatula]
	F01_transcript/19162	4851	4087	3855	12	9	14	1079.15	1007.91	889.1	2.37	2.04	3.08	3.37186957579859e-318	-8.70343	down	--	--	Cellular Component: integral component of membrane (GO:0016021);;	K14332|1.82462e-84|cam:101500027|K14332 photosystem I subunit PsaO | (RefSeq) photosystem I subunit O	ko00195:Photosynthesis	--	--	--	Photosystem I subunit O (Precursor) GN=PSAO OS=Arabidopsis thaliana (Mouse-ear cress) PE=1 SV=1	S	Function unknown	unknown [Medicago truncatula]
	F01_transcript/19747	126	95	98	0	1	0	33.82	28.34	27.15	0	0.27	0	2.14613e-46	-8.38945	down	--	--	Cellular Component: integral component of membrane (GO:0016021);;	K14332|2.49667e-53|cam:101500027|K14332 photosystem I subunit PsaO | (RefSeq) photosystem I subunit O	ko00195:Photosynthesis	--	--	--	Photosystem I subunit O (Precursor) GN=PSAO OS=Arabidopsis thaliana (Mouse-ear cress) PE=1 SV=1	S	Function unknown	unknown [Medicago truncatula]
	F01_transcript/20623	52	53	53	1	0	0	70.77	76.23	65.38	1.03	0	0	1.74222e-23	-7.63883	down	--	--	--	K14332|6.59774e-07|bdi:100840579|K14332 photosystem I subunit PsaO | (RefSeq) photosystem I subunit O	ko00195:Photosynthesis	--	--	--	Photosystem I subunit O (Precursor) GN=PSAO OS=Arabidopsis thaliana (Mouse-ear cress) PE=1 SV=1	S	Function unknown	unknown [Medicago truncatula]
	F01_transcript/20853	72	62	81	13	22	12	52.2	48.51	56.8	7.7	13.89	8.49	8.24332e-12	-2.3564	down	--	--	Cellular Component: plastid (GO:0009536);; Cellular Component: integral component of membrane (GO:0016021);;	K14332|1.11484e-13|bdi:100840579|K14332 photosystem I subunit PsaO | (RefSeq) photosystem I subunit O	ko00195:Photosynthesis	--	--	--	Photosystem I subunit O (Precursor) GN=PSAO OS=Arabidopsis thaliana (Mouse-ear cress) PE=1 SV=1	S	Function unknown	unknown [Medicago truncatula]
S_CK_vs_S_L (S2)
Component		T19_Count	T20_Count	T21_Count	T22_Count	T23_Count	T24_Count	T19_FPKM	T20_FPKM	T21_FPKM	T22_FPKM	T23_FPKM	T24_FPKM	FDR	log2FC	regulated	COG_class	COG_class_annotation	GO_annotation	KEGG_annotation	KEGG_pathway	KOG_class	KOG_class_annotation	Pfam_annotation	Swissprot_annotation	eggNOG_class	eggNOG_class_annotation	nr_annotation
PsbD	F01_transcript/19033	463	721	487	236	238	270	79.5	134.6	95.41	55.53	55.09	56.97	0.00353633	-1.25015	down	--	--	Molecular Function: iron ion binding (GO:0005506);; Cellular Component: photosystem II (GO:0009523);; Cellular Component: chloroplast thylakoid membrane (GO:0009535);; Biological Process: photosynthetic electron transport in photosystem II (GO:0009772);; Cellular Component: integral component of membrane (GO:0016021);; Molecular Function: chlorophyll binding (GO:0016168);; Molecular Function: oxi…	K02706|8.34551e-134|cam:6797468|K02706 photosystem II P680 reaction center D2 protein [EC:1.10.3.9] | (RefSeq) psbD, CiarC_p016; photosystem II protein D2	ko00195:Photosynthesis	--	--	Photosynthetic reaction centre protein	Photosystem II D2 protein {ECO:0000255|HAMAP-Rule:MF_01383} OS=Jasminum nudiflorum (Winter jasmine) PE=3 SV=1	C	Energy production and conversion	PSII D2 [Pyrus communis]
PetB	F01_transcript/413	656	1149	653	255	224	213	8.86	16.77	9.78	4.57	3.9	3.57	0.00202753	-1.91122	down	[C]	Energy production and conversion	Molecular Function: iron ion binding (GO:0005506);; Cellular Component: chloroplast thylakoid membrane (GO:0009535);; Biological Process: photosynthesis (GO:0015979);; Cellular Component: integral component of membrane (GO:0016021);; Molecular Function: oxidoreductase activity (GO:0016491);; Molecular Function: heme binding (GO:0020037);; Biological Process: respiratory electron transport chain (…	K02635|3.69234e-141|cmo:103504414|K02635 cytochrome b6 | (RefSeq) cytochrome b6	ko00195:Photosynthesis	[C]	Energy production and conversion	Cytochrome b/b6/petB;; Cytochrome b(N-terminal)/b6/petB;; Photosystem II protein;; Cytochrome b(C-terminal)/b6/petD;; Photosystem II 10 kDa phosphoprotein	Cytochrome b6 {ECO:0000255|HAMAP-Rule:MF_00633} OS=Oenothera elata subsp. hookeri (Hooker&apos;s evening primrose) PE=3 SV=2	C	Energy production and conversion	PREDICTED: LOW QUALITY PROTEIN: cytochrome b6, partial [Cucumis melo]
PetC	F01_transcript/21686	115	97	118	388	360	459	166.14	152.05	212.42	915.97	898.73	873.94	6.94515e-34	1.81064	up	[C]	Energy production and conversion	Molecular Function: plastoquinol--plastocyanin reductase activity (GO:0009496);; Cellular Component: chloroplast thylakoid membrane (GO:0009535);; Biological Process: photosynthesis (GO:0015979);; Cellular Component: integral component of membrane (GO:0016021);; Molecular Function: electron transporter, transferring electrons within cytochrome b6/f complex of photosystem II activity (GO:0045158);…	K02636|5.30929e-27|mtr:MTR_2g089510|K02636 cytochrome b6-f complex iron-sulfur subunit [EC:1.10.9.1] | (RefSeq) cytochrome b6-F complex iron-sulfur subunit	ko00195:Photosynthesis	[C]	Energy production and conversion	--	Cytochrome b6-f complex iron-sulfur subunit, chloroplastic (Precursor) GN=petC OS=Pisum sativum (Garden pea) PE=2 SV=1	C	Energy production and conversion	Cytochrome b6-f complex iron-sulfur subunit [Medicago truncatula]
	F01_transcript/15817	15225	11743	13600	5504	5560	5358	1213.75	1014.66	1216.64	589.19	582.19	527.46	5.09763e-94	-1.35673	down	[C]	Energy production and conversion	Molecular Function: plastoquinol--plastocyanin reductase activity (GO:0009496);; Cellular Component: chloroplast thylakoid membrane (GO:0009535);; Biological Process: photosynthesis (GO:0015979);; Cellular Component: integral component of membrane (GO:0016021);; Molecular Function: electron transporter, transferring electrons within cytochrome b6/f complex of photosystem II activity (GO:0045158);…	K02636|8.36822e-138|mtr:MTR_2g089510|K02636 cytochrome b6-f complex iron-sulfur subunit [EC:1.10.9.1] | (RefSeq) cytochrome b6-F complex iron-sulfur subunit	ko00195:Photosynthesis	[C]	Energy production and conversion	Cytochrome B6-F complex Fe-S subunit;; Rieske [2Fe-2S] domain	Cytochrome b6-f complex iron-sulfur subunit, chloroplastic (Precursor) GN=petC OS=Pisum sativum (Garden pea) PE=2 SV=1	C	Energy production and conversion	Cytochrome b6-f complex iron-sulfur subunit [Medicago truncatula]
PsbH	F01_transcript/16954	129	112	141	0	0	0	13.25	12.47	16.31	0	0	0	2.94772e-49	-1.45	down	--	--	Cellular Component: photosystem II (GO:0009523);; Cellular Component: chloroplast thylakoid membrane (GO:0009535);; Biological Process: photosynthesis (GO:0015979);; Cellular Component: integral component of membrane (GO:0016021);; Molecular Function: phosphate ion binding (GO:0042301);; Biological Process: protein stabilization (GO:0050821);;	K02709|2.9191e-41|mtr:MetrCp030|K02709 photosystem II PsbH protein | (RefSeq) psbH; photosystem II protein H	ko00195:Photosynthesis	--	--	Photosystem II 10 kDa phosphoprotein	Photosystem II reaction center protein H GN=psbH OS=Pisum sativum (Garden pea) PE=3 SV=3	C	Energy production and conversion	photosystem II phosphoprotein (chloroplast) [Medicago truncatula f. tricycla]
PsbO	F01_transcript/14445	5236	4277	4650	1299	1288	1373	367.26	325.11	365.41	122.1	118.37	119	5.44543e-214	-1.89383	down	--	--	Molecular Function: calcium ion binding (GO:0005509);; Cellular Component: chloroplast thylakoid membrane (GO:0009535);; Cellular Component: photosystem II oxygen evolving complex (GO:0009654);; Cellular Component: integral component of membrane (GO:0016021);; Cellular Component: extrinsic component of membrane (GO:0019898);; Biological Process: photosystem II stabilization (GO:0042549);;	K02716|0|mtr:MTR_5g018670|K02716 photosystem II oxygen-evolving enhancer protein 1 | (RefSeq) photosystem II oxygen-evolving enhancer protein	ko00195:Photosynthesis	--	--	Manganese-stabilising protein / photosystem II polypeptide	Oxygen-evolving enhancer protein 1, chloroplastic (Precursor) GN=PSBO OS=Pisum sativum (Garden pea) PE=2 SV=1	G	Carbohydrate transport and metabolism	Oxygen evolving enhancer protein [Medicago truncatula]
PsbP	F01_transcript/15127	314	290	331	619	647	722	21.56	21.58	25.45	56.93	58.17	61.25	9.97146e-26	1.02493	up	--	--	Molecular Function: calcium ion binding (GO:0005509);; Cellular Component: photosystem II oxygen evolving complex (GO:0009654);; Biological Process: photosynthesis (GO:0015979);; Cellular Component: extrinsic component of membrane (GO:0019898);;	K02717|3.31389e-180|mtr:MTR_5g090410|K02717 photosystem II oxygen-evolving enhancer protein 2 | (RefSeq) oxygen-evolving enhancer protein 2-1	ko00195:Photosynthesis	--	--	PsbP	Oxygen-evolving enhancer protein 2, chloroplastic (Precursor) GN=PSBP OS=Pisum sativum (Garden pea) PE=1 SV=1	S	Function unknown	Oxygen-evolving enhancer protein [Medicago truncatula]
	F01_transcript/15420	183	136	197	1827	1892	1792	13.7	10.99	16.47	182.57	184.81	164.83	5.06317e-292	3.36318	up	--	--	Molecular Function: calcium ion binding (GO:0005509);; Cellular Component: chloroplast thylakoid membrane (GO:0009535);; Cellular Component: photosystem II oxygen evolving complex (GO:0009654);; Biological Process: photosynthesis (GO:0015979);; Cellular Component: extrinsic component of membrane (GO:0019898);;	K02717|1.90406e-150|cam:101514916|K02717 photosystem II oxygen-evolving enhancer protein 2 | (RefSeq) oxygen-evolving enhancer protein 2, chloroplastic	ko00195:Photosynthesis	--	--	PsbP	Oxygen-evolving enhancer protein 2, chloroplastic (Precursor) GN=PSBP OS=Pisum sativum (Garden pea) PE=1 SV=1	S	Function unknown	unknown [Medicago truncatula]
	F01_transcript/16393	429	303	361	1758	1818	1880	38.53	29.54	36.46	212.39	215.07	208.38	8.92285e-200	2.27012	up	--	--	Molecular Function: calcium ion binding (GO:0005509);; Cellular Component: chloroplast (GO:0009507);; Cellular Component: photosystem II oxygen evolving complex (GO:0009654);; Biological Process: photosynthesis (GO:0015979);; Cellular Component: extrinsic component of membrane (GO:0019898);; Cellular Component: thylakoid lumen (GO:0031977);;	K02717|3.1502e-140|cam:101510219|K02717 photosystem II oxygen-evolving enhancer protein 2 | (RefSeq) psbP-like protein 1, chloroplastic	ko00195:Photosynthesis	--	--	PsbP	PsbP-like protein 1, chloroplastic (Precursor) GN=PPL1 OS=Arabidopsis thaliana (Mouse-ear cress) PE=1 SV=1	G	Carbohydrate transport and metabolism	oxygen-evolving complex/thylakoid lumenal 25.6 kDa protein [Medicago truncatula]
	F01_transcript/21099	117	116	131	380	316	398	83.64	90.1	112.61	410.31	348.02	354.07	7.23718e-22	1.52254	up	--	--	Molecular Function: calcium ion binding (GO:0005509);; Cellular Component: chloroplast thylakoid membrane (GO:0009535);; Cellular Component: photosystem II oxygen evolving complex (GO:0009654);; Biological Process: photosynthesis (GO:0015979);; Cellular Component: extrinsic component of membrane (GO:0019898);;	K02717|2.83282e-44|cam:101514916|K02717 photosystem II oxygen-evolving enhancer protein 2 | (RefSeq) oxygen-evolving enhancer protein 2, chloroplastic	ko00195:Photosynthesis	--	--	--	Oxygen-evolving enhancer protein 2, chloroplastic (Precursor) GN=PSBP OS=Pisum sativum (Garden pea) PE=1 SV=1	S	Function unknown	oxygen-evolving enhancer protein 2-1 [Medicago truncatula]
PsbQ	F01_transcript/16704	2537	2755	2837	25776	26804	28010	240.3	282.91	302.32	3287.63	3347.21	3271.99	0	3.2408	up	--	--	Molecular Function: calcium ion binding (GO:0005509);; Cellular Component: photosystem II oxygen evolving complex (GO:0009654);; Biological Process: photosynthesis (GO:0015979);; Cellular Component: extrinsic component of membrane (GO:0019898);;	K08901|2.24749e-117|cam:101495316|K08901 photosystem II oxygen-evolving enhancer protein 3 | (RefSeq) oxygen-evolving enhancer protein 3, chloroplastic-like	ko00195:Photosynthesis	--	--	Oxygen evolving enhancer protein 3 (PsbQ)	Oxygen-evolving enhancer protein 3-2, chloroplastic (Precursor) GN=C17L7.100 OS=Arabidopsis thaliana (Mouse-ear cress) PE=1 SV=2	S	Function unknown	unknown [Medicago truncatula]
	F01_transcript/15600	60888	49403	53426	11917	11947	11770	4896.04	4305.89	4821.51	1286.91	1262.08	1168.6	3.19372e-85	-2.25369	down	--	--	Molecular Function: calcium ion binding (GO:0005509);; Cellular Component: photosystem II oxygen evolving complex (GO:0009654);; Biological Process: photosynthesis (GO:0015979);; Cellular Component: extrinsic component of membrane (GO:0019898);;	K08901|1.31713e-116|cam:101495316|K08901 photosystem II oxygen-evolving enhancer protein 3 | (RefSeq) oxygen-evolving enhancer protein 3, chloroplastic-like	ko00195:Photosynthesis	--	--	Oxygen evolving enhancer protein 3 (PsbQ)	Oxygen-evolving enhancer protein 3-2, chloroplastic (Precursor) GN=C17L7.100 OS=Arabidopsis thaliana (Mouse-ear cress) PE=1 SV=2	S	Function unknown	unknown [Medicago truncatula]
	F01_transcript/17850	373	333	272	27	34	23	47.13	45.61	38.83	4.71	5.71	3.65	8.29822e-51	-3.59442	down	--	--	Molecular Function: calcium ion binding (GO:0005509);; Cellular Component: photosystem II oxygen evolving complex (GO:0009654);; Biological Process: photosynthesis (GO:0015979);; Cellular Component: extrinsic component of membrane (GO:0019898);;	K08901|2.20564e-71|cam:101513108|K08901 photosystem II oxygen-evolving enhancer protein 3 | (RefSeq) photosynthetic NDH subunit of lumenal location 2, chloroplastic	ko00195:Photosynthesis	--	--	Oxygen evolving enhancer protein 3 (PsbQ)	PsbQ-like protein 1, chloroplastic (Precursor) GN=F7A19.23 OS=Arabidopsis thaliana (Mouse-ear cress) PE=1 SV=1	S	Function unknown	PREDICTED: LOW QUALITY PROTEIN: psbQ-like protein 1, chloroplastic-like [Cicer arietinum]
PsbR	F01_transcript/18873	2709	1982	2484	12086	11907	13341	507.61	403.92	532.46	3113.39	3020.31	3068.98	3.38355e-283	2.3269	up	--	--	Cellular Component: photosystem II oxygen evolving complex (GO:0009654);; Biological Process: photosynthesis (GO:0015979);; Cellular Component: integral component of membrane (GO:0016021);;	K03541|5.49525e-70|mtr:MTR_2g064650|K03541 photosystem II 10kDa protein | (RefSeq) photosystem II 10 kDa proteinPsbR protein	ko00195:Photosynthesis	--	--	Photosystem II 10 kDa polypeptide PsbR	Photosystem II 10 kDa polypeptide, chloroplastic (Precursor) GN=PSBR OS=Solanum tuberosum (Potato) PE=2 SV=1	S	Function unknown	Photosystem II 10 kDa polypeptide [Medicago truncatula]
	F01_transcript/21140	185	126	117	1	2	3	119.09	89.19	91.06	1.14	2.26	2.84	6.30445e-43	-6.21431	down	--	--	Cellular Component: photosystem II oxygen evolving complex (GO:0009654);; Biological Process: photosynthesis (GO:0015979);; Cellular Component: integral component of membrane (GO:0016021);;	K03541|6.76822e-25|mtr:MTR_2g064650|K03541 photosystem II 10kDa protein | (RefSeq) photosystem II 10 kDa proteinPsbR protein	ko00195:Photosynthesis	--	--	Photosystem II 10 kDa polypeptide PsbR	Photosystem II 10 kDa polypeptide, chloroplastic (Precursor) GN=PSBR OS=Nicotiana tabacum (Common tobacco) PE=2 SV=1	S	Function unknown	Photosystem II 10 kDa polypeptide [Medicago truncatula]
PsbS	F01_transcript/14964	542	506	476	1180	1068	1136	36.47	36.93	35.85	106.28	94.05	94.43	1.35962e-35	1.09214	up	--	--	Cellular Component: integral component of membrane (GO:0016021);;	K03542|1.02465e-135|mtr:MTR_3g088040|K03542 photosystem II 22kDa protein | (RefSeq) light-harvesting complex I chlorophyll A/B-binding protein	ko00195:Photosynthesis	--	--	Chlorophyll A-B binding protein	Photosystem II 22 kDa protein, chloroplastic (Precursor) GN=PSBS OS=Spinacia oleracea (Spinach) PE=1 SV=1	I	Lipid transport and metabolism	Photosystem II 22 kDa protein [Medicago truncatula]
PsbW	F01_transcript/18209	9404	6549	8022	3742	3512	3514	1294.69	979.25	1252.47	700.66	645.49	595.64	2.93585e-24	-1.202	down	--	--	Cellular Component: chloroplast (GO:0009507);; Cellular Component: photosystem II (GO:0009523);; Biological Process: photosynthesis (GO:0015979);; Cellular Component: integral component of membrane (GO:0016021);;	K02721|7.24085e-30|cam:101513777|K02721 photosystem II PsbW protein | (RefSeq) photosystem II reaction center W protein, chloroplastic-like	ko00195:Photosynthesis	--	--	Photosystem II reaction centre W protein (PsbW);; Photosystem II reaction centre W protein (PsbW)	Photosystem II reaction center W protein, chloroplastic (Precursor) GN=psbW OS=Spinacia oleracea (Spinach) PE=1 SV=1	S	Function unknown	photosystem II reaction center W [Medicago truncatula]
PetF	F01_transcript/16645	152	134	186	468	468	499	14.46	13.88	19.96	59.91	58.65	58.51	1.55661e-34	1.54187	up	[C]	Energy production and conversion	Molecular Function: electron carrier activity (GO:0009055);; Cellular Component: chloroplast (GO:0009507);; Biological Process: electron transport chain (GO:0022900);; Molecular Function: metal ion binding (GO:0046872);; Molecular Function: 2 iron, 2 sulfur cluster binding (GO:0051537);;	K02639|1.07578e-124|mtr:MTR_4g098490|K02639 ferredoxin | (RefSeq) 2Fe-2S ferredoxin superfamily protein	ko00195:Photosynthesis	--	--	2Fe-2S iron-sulfur cluster binding domain	Ferredoxin-A OS=Alocasia macrorrhizos (Giant taro) PE=1 SV=1	C	Energy production and conversion	Ferredoxin-6 [Medicago truncatula]
	F01_transcript/21206	106	71	69	300	273	350	79.33	58.02	62.53	342.8	319.53	328.61	4.69876e-28	1.86257	up	[C]	Energy production and conversion	Biological Process: ferredoxin metabolic process (GO:0006124);; Molecular Function: ferrous iron binding (GO:0008198);; Molecular Function: electron carrier activity (GO:0009055);; Cellular Component: chloroplast (GO:0009507);; Biological Process: electron transport chain (GO:0022900);; Molecular Function: 2 iron, 2 sulfur cluster binding (GO:0051537);;	K02639|4.04226e-20|mtr:MTR_2g006290|K02639 ferredoxin | (RefSeq) 2Fe-2S ferredoxin superfamily protein	ko00195:Photosynthesis	--	--	--	Ferredoxin OS=Medicago sativa (Alfalfa) PE=1 SV=1	C	Energy production and conversion	RecName: Full=Ferredoxin [Medicago sativa]
	F01_transcript/16064	1503	1264	1355	668	739	723	124.67	113.71	126.27	74.48	80.59	74.08	9.89752e-46	-1.00928	down	[C]	Energy production and conversion	Molecular Function: electron carrier activity (GO:0009055);; Cellular Component: chloroplast (GO:0009507);; Biological Process: electron transport chain (GO:0022900);; Molecular Function: metal ion binding (GO:0046872);; Molecular Function: 2 iron, 2 sulfur cluster binding (GO:0051537);;	K02639|4.11712e-124|mtr:MTR_4g098490|K02639 ferredoxin | (RefSeq) 2Fe-2S ferredoxin superfamily protein	ko00195:Photosynthesis	--	--	2Fe-2S iron-sulfur cluster binding domain	Ferredoxin-A OS=Alocasia macrorrhizos (Giant taro) PE=1 SV=1	C	Energy production and conversion	Ferredoxin-6 [Medicago truncatula]
	F01_transcript/16675	2907	2092	2603	869	897	915	282.99	220.89	285.35	114.13	115.35	109.98	1.85056e-41	-1.55442	down	[C]	Energy production and conversion	Molecular Function: protein binding (GO:0005515);; Molecular Function: electron carrier activity (GO:0009055);; Cellular Component: chloroplast (GO:0009507);; Biological Process: electron transport chain (GO:0022900);; Molecular Function: metal ion binding (GO:0046872);; Molecular Function: 2 iron, 2 sulfur cluster binding (GO:0051537);;	K02639|1.48871e-82|mtr:MTR_2g006290|K02639 ferredoxin | (RefSeq) 2Fe-2S ferredoxin superfamily protein	ko00195:Photosynthesis	--	--	2Fe-2S iron-sulfur cluster binding domain	Ferredoxin-1, chloroplastic (Precursor) GN=PETF OS=Pisum sativum (Garden pea) PE=1 SV=2	C	Energy production and conversion	Ferredoxin I [Medicago truncatula]
	F01_transcript/18142	640	623	477	83	165	127	87.93	93.02	74.41	15.5	30.26	21.51	7.48401e-19	-2.27824	down	[C]	Energy production and conversion	Molecular Function: electron carrier activity (GO:0009055);; Biological Process: electron transport chain (GO:0022900);; Molecular Function: metal ion binding (GO:0046872);; Molecular Function: 2 iron, 2 sulfur cluster binding (GO:0051537);;	K02639|2.08001e-97|mtr:MTR_8g088720|K02639 ferredoxin | (RefSeq) 2Fe-2S ferredoxin superfamily protein	ko00195:Photosynthesis	--	--	2Fe-2S iron-sulfur cluster binding domain	Ferredoxin-1, chloroplastic (Precursor) GN=SEND33 OS=Solanum lycopersicum (Tomato) PE=2 SV=1	C	Energy production and conversion	Ferredoxin I [Medicago truncatula]
	F01_transcript/18206	3964	2862	3588	1127	1112	1160	588.12	461.22	604.85	228.04	220.94	211.75	1.81383e-43	-1.66612	down	[C]	Energy production and conversion	Molecular Function: electron carrier activity (GO:0009055);; Biological Process: electron transport chain (GO:0022900);; Molecular Function: metal ion binding (GO:0046872);; Molecular Function: 2 iron, 2 sulfur cluster binding (GO:0051537);;	K02639|1.428e-97|mtr:MTR_8g088720|K02639 ferredoxin | (RefSeq) 2Fe-2S ferredoxin superfamily protein	ko00195:Photosynthesis	--	--	2Fe-2S iron-sulfur cluster binding domain	Ferredoxin-1, chloroplastic (Precursor) GN=SEND33 OS=Solanum lycopersicum (Tomato) PE=2 SV=1	C	Energy production and conversion	Ferredoxin I [Medicago truncatula]
PetH	F01_transcript/12300	10	37	15	22965	23560	24153	0.46	1.79	0.74	1335.51	1337.36	1304.27	0	10.0408	up	[P]	Inorganic ion transport and metabolism	Molecular Function: nucleotide binding (GO:0000166);; Molecular Function: ferredoxin-NADP+ reductase activity (GO:0004324);; Molecular Function: protein binding (GO:0005515);; Molecular Function: poly(U) RNA binding (GO:0008266);; Cellular Component: chloroplast thylakoid membrane (GO:0009535);; Cellular Component: chloroplast stroma (GO:0009570);; Biological Process: photosynthetic electron tran…	K02641|0|mtr:MTR_5g022300|K02641 ferredoxin--NADP+ reductase [EC:1.18.1.2] | (RefSeq) leaf ferredoxin-NADP reductase	ko00195:Photosynthesis	[C]	Energy production and conversion	Oxidoreductase NAD-binding domain;; Oxidoreductase FAD-binding domain	Ferredoxin--NADP reductase, leaf isozyme, chloroplastic (Precursor) GN=PETH OS=Pisum sativum (Garden pea) PE=1 SV=1	P	Inorganic ion transport and metabolism	Ferredoxin-NADP reductase [Medicago truncatula]
	F01_transcript/13755	969	2955	1976	6908	8743	8000	53.54	176.7	121.9	509.36	629.69	546.08	5.05439e-14	1.89578	up	[P]	Inorganic ion transport and metabolism	Molecular Function: ferredoxin-NADP+ reductase activity (GO:0004324);; Molecular Function: protein binding (GO:0005515);; Molecular Function: poly(U) RNA binding (GO:0008266);; Cellular Component: chloroplast thylakoid membrane (GO:0009535);; Cellular Component: chloroplast stroma (GO:0009570);; Biological Process: photosynthetic electron transport chain (GO:0009767);; Cellular Component: chlorop…	K02641|0|mtr:MTR_5g022300|K02641 ferredoxin--NADP+ reductase [EC:1.18.1.2] | (RefSeq) leaf ferredoxin-NADP reductase	ko00195:Photosynthesis	[C]	Energy production and conversion	Oxidoreductase NAD-binding domain;; Oxidoreductase FAD-binding domain	Ferredoxin--NADP reductase, leaf isozyme, chloroplastic (Precursor) GN=PETH OS=Pisum sativum (Garden pea) PE=1 SV=1	P	Inorganic ion transport and metabolism	Ferredoxin-NADP reductase [Medicago truncatula]
	F01_transcript/16740	4601	4718	2999	9441	9488	11268	446.32	496.35	327.49	1234.27	1214.72	1348.36	2.41789e-15	1.2307	up	[P]	Inorganic ion transport and metabolism	Molecular Function: ferredoxin-NADP+ reductase activity (GO:0004324);; Molecular Function: protein binding (GO:0005515);; Molecular Function: poly(U) RNA binding (GO:0008266);; Cellular Component: chloroplast thylakoid membrane (GO:0009535);; Cellular Component: chloroplast stroma (GO:0009570);; Biological Process: photosynthetic electron transport chain (GO:0009767);; Cellular Component: chlorop…	K02641|2.49756e-149|mtr:MTR_5g022300|K02641 ferredoxin--NADP+ reductase [EC:1.18.1.2] | (RefSeq) leaf ferredoxin-NADP reductase	ko00195:Photosynthesis	[C]	Energy production and conversion	Oxidoreductase NAD-binding domain	Ferredoxin--NADP reductase, leaf isozyme, chloroplastic (Precursor) GN=PETH OS=Pisum sativum (Garden pea) PE=1 SV=1	P	Inorganic ion transport and metabolism	unknown [Medicago truncatula]
	F01_transcript/12742	45733	35771	40593	19165	19356	19059	2114.37	1790.58	2093.32	1181.15	1164.57	1089.95	3.59909e-27	-1.13713	down	[P]	Inorganic ion transport and metabolism	Molecular Function: nucleotide binding (GO:0000166);; Molecular Function: ferredoxin-NADP+ reductase activity (GO:0004324);; Molecular Function: protein binding (GO:0005515);; Molecular Function: poly(U) RNA binding (GO:0008266);; Cellular Component: chloroplast thylakoid membrane (GO:0009535);; Cellular Component: chloroplast stroma (GO:0009570);; Biological Process: photosynthetic electron tran…	K02641|0|mtr:MTR_5g022300|K02641 ferredoxin--NADP+ reductase [EC:1.18.1.2] | (RefSeq) leaf ferredoxin-NADP reductase	ko00195:Photosynthesis	[C]	Energy production and conversion	Oxidoreductase NAD-binding domain;; Oxidoreductase FAD-binding domain	Ferredoxin--NADP reductase, leaf isozyme, chloroplastic (Precursor) GN=PETH OS=Pisum sativum (Garden pea) PE=1 SV=1	P	Inorganic ion transport and metabolism	Ferredoxin-NADP reductase [Medicago truncatula]
	F01_transcript/13117	22776	18040	20366	9744	10252	9936	1069.07	916.78	1066.39	609.76	626.34	576.87	5.26115e-47	-1.08507	down	[P]	Inorganic ion transport and metabolism	Molecular Function: nucleotide binding (GO:0000166);; Molecular Function: ferredoxin-NADP+ reductase activity (GO:0004324);; Molecular Function: protein binding (GO:0005515);; Molecular Function: poly(U) RNA binding (GO:0008266);; Cellular Component: chloroplast thylakoid membrane (GO:0009535);; Cellular Component: chloroplast stroma (GO:0009570);; Biological Process: photosynthetic electron tran…	K02641|0|mtr:MTR_5g022300|K02641 ferredoxin--NADP+ reductase [EC:1.18.1.2] | (RefSeq) leaf ferredoxin-NADP reductase	ko00195:Photosynthesis	[C]	Energy production and conversion	Oxidoreductase NAD-binding domain;; Oxidoreductase FAD-binding domain	Ferredoxin--NADP reductase, leaf isozyme, chloroplastic (Precursor) GN=PETH OS=Pisum sativum (Garden pea) PE=1 SV=1	P	Inorganic ion transport and metabolism	Ferredoxin-NADP reductase [Medicago truncatula]
PsbY	F01_transcript/17058	822	654	559	1758	1922	1995	86.14	74.33	66	248.49	266.21	257.55	2.38329e-76	1.42781	up	--	--	Cellular Component: photosystem II (GO:0009523);; Biological Process: photosynthesis (GO:0015979);; Cellular Component: integral component of membrane (GO:0016021);; Molecular Function: manganese ion binding (GO:0030145);;	K02723|2.01439e-51|cam:101506330|K02723 photosystem II PsbY protein | (RefSeq) photosystem II core complex proteins psbY, chloroplastic-like	ko00195:Photosynthesis	--	--	Photosystem II protein Y (PsbY)	Photosystem II protein psbY-2, chloroplastic (Precursor) GN=PSBY OS=Spinacia oleracea (Spinach) PE=1 SV=2	I	Lipid transport and metabolism	unknown [Medicago truncatula]
	F01_transcript/17147	3663	3067	3233	1232	1164	1322	396.19	359.95	394.5	180.15	166.71	176.4	1.04273e-131	-1.47844	down	--	--	Cellular Component: photosystem II (GO:0009523);; Biological Process: photosynthesis (GO:0015979);; Cellular Component: integral component of membrane (GO:0016021);; Molecular Function: manganese ion binding (GO:0030145);;	K02723|6.8244e-51|cam:101506330|K02723 photosystem II PsbY protein | (RefSeq) photosystem II core complex proteins psbY, chloroplastic-like	ko00195:Photosynthesis	--	--	Photosystem II protein Y (PsbY)	Photosystem II protein psbY-2, chloroplastic (Precursor) GN=PSBY OS=Spinacia oleracea (Spinach) PE=1 SV=2	I	Lipid transport and metabolism	unknown [Medicago truncatula]
Psb27	F01_transcript/17718	294	306	261	619	688	765	38.24	43.25	38.51	109.25	119.08	122.52	5.46102e-27	1.20019	up	--	--	Cellular Component: chloroplast thylakoid lumen (GO:0009543);; Biological Process: photosystem II repair (GO:0010206);; Biological Process: photosystem II assembly (GO:0010207);;	K08902|4.7607e-76|cam:101500783|K08902 photosystem II Psb27 protein | (RefSeq) photosystem II repair protein PSB27-H1, chloroplastic	ko00195:Photosynthesis	--	--	Photosystem II Pbs27	Photosystem II repair protein PSB27-H1, chloroplastic (Precursor) OS=Arabidopsis thaliana (Mouse-ear cress) PE=1 SV=1	G	Carbohydrate transport and metabolism	photosystem II Pbs27 protein [Medicago truncatula]
	F01_transcript/17189	2040	1907	1569	291	232	236	216.11	219.13	187.38	41.68	32.62	30.91	1.55673e-47	-2.91614	down	--	--	Cellular Component: chloroplast thylakoid lumen (GO:0009543);; Biological Process: photosystem II repair (GO:0010206);; Biological Process: photosystem II assembly (GO:0010207);;	K08902|5.02003e-74|cam:101500783|K08902 photosystem II Psb27 protein | (RefSeq) photosystem II repair protein PSB27-H1, chloroplastic	ko00195:Photosynthesis	--	--	Photosystem II Pbs27	Photosystem II repair protein PSB27-H1, chloroplastic (Precursor) OS=Arabidopsis thaliana (Mouse-ear cress) PE=1 SV=1	G	Carbohydrate transport and metabolism	photosystem II Pbs27 protein [Medicago truncatula]
	F01_transcript/17811	2387	1940	2155	832	992	973	284.29	250.8	290.09	134.19	156.86	142.83	1.69793e-89	-1.2692	down	--	--	Cellular Component: chloroplast thylakoid lumen (GO:0009543);; Biological Process: photosystem II repair (GO:0010206);; Biological Process: photosystem II assembly (GO:0010207);;	K08902|5.73061e-75|cam:101500783|K08902 photosystem II Psb27 protein | (RefSeq) photosystem II repair protein PSB27-H1, chloroplastic	ko00195:Photosynthesis	--	--	Photosystem II Pbs27	Photosystem II repair protein PSB27-H1, chloroplastic (Precursor) OS=Arabidopsis thaliana (Mouse-ear cress) PE=1 SV=1	G	Carbohydrate transport and metabolism	photosystem II Pbs27 protein [Medicago truncatula]
PsaA	F01_transcript/333	3861	5688	3720	1337	1299	1533	51.24	81.63	54.74	23.48	22.23	25.21	0.000105625	-1.75057	down	[M]	Cell wall/membrane/envelope biogenesis	Molecular Function: magnesium ion binding (GO:0000287);; Molecular Function: electron carrier activity (GO:0009055);; Cellular Component: photosystem I (GO:0009522);; Cellular Component: chloroplast thylakoid membrane (GO:0009535);; Biological Process: photosynthesis (GO:0015979);; Cellular Component: integral component of membrane (GO:0016021);; Molecular Function: chlorophyll binding (GO:001616…	K02689|0|mtr:MetrCp066|K02689 photosystem I P700 chlorophyll a apoprotein A1 | (RefSeq) psaA; photosystem I P700 chlorophyll a apoprotein A1	ko00195:Photosynthesis	--	--	Photosystem I psaA/psaB protein;; Photosystem I psaA/psaB protein;; Photosystem I psaA/psaB protein;; Ribosomal protein S14p/S29e	Photosystem I P700 chlorophyll a apoprotein A1 {ECO:0000255|HAMAP-Rule:MF_00458} GN=CsCp034 OS=Cucumis sativus (Cucumber) PE=3 SV=1	C	Energy production and conversion	photosystem I P700 apoprotein A1 [Medicago truncatula]
PsaB	F01_transcript/2784	9	120	12	199	187	233	0.19	2.54	0.28	5.15	4.73	5.65	7.74615e-05	1.98309	up	[M]	Cell wall/membrane/envelope biogenesis	Molecular Function: magnesium ion binding (GO:0000287);; Molecular Function: electron carrier activity (GO:0009055);; Cellular Component: photosystem I (GO:0009522);; Cellular Component: chloroplast thylakoid membrane (GO:0009535);; Biological Process: photosynthesis (GO:0015979);; Cellular Component: integral component of membrane (GO:0016021);; Molecular Function: chlorophyll binding (GO:001616…	K02690|0|mtr:MTR_3g035600|K02690 photosystem I P700 chlorophyll a apoprotein A2 | (RefSeq) photosystem I P700 chlorophyll A apoprotein A2	ko00195:Photosynthesis	--	--	Photosystem I psaA/psaB protein;; Photosystem I psaA/psaB protein;; Ribosomal protein S14p/S29e	Photosystem I P700 chlorophyll a apoprotein A2 {ECO:0000255|HAMAP-Rule:MF_00482} OS=Lotus japonicus (Lotus corniculatus var. japonicus) PE=3 SV=1	C	Energy production and conversion	photosystem I P700 chlorophyll A apoprotein A2 [Medicago truncatula]
	F01_transcript/5145	223	325	177	61	39	0	5.37	8.47	4.75	1.98	1.22	0.03	1.11949e-05	-2.90744	down	[M]	Cell wall/membrane/envelope biogenesis	Molecular Function: magnesium ion binding (GO:0000287);; Molecular Function: electron carrier activity (GO:0009055);; Cellular Component: photosystem I (GO:0009522);; Cellular Component: chloroplast thylakoid membrane (GO:0009535);; Biological Process: photosynthesis (GO:0015979);; Cellular Component: integral component of membrane (GO:0016021);; Molecular Function: chlorophyll binding (GO:001616…	K02690|0|mtr:MTR_3g035600|K02690 photosystem I P700 chlorophyll a apoprotein A2 | (RefSeq) photosystem I P700 chlorophyll A apoprotein A2	ko00195:Photosynthesis	--	--	Photosystem I psaA/psaB protein;; Ribosomal protein S14p/S29e;; Photosystem I psaA/psaB protein	Photosystem I P700 chlorophyll a apoprotein A2 {ECO:0000255|HAMAP-Rule:MF_00482} OS=Lotus japonicus (Lotus corniculatus var. japonicus) PE=3 SV=1	C	Energy production and conversion	photosystem I P700 chlorophyll A apoprotein A2 [Medicago truncatula]
PsaD	F01_transcript/15970	55621	47346	47354	24317	25766	27152	5471.78	5051.72	5245.34	3225.15	3346.56	3294.85	4.51793e-17	-1.01775	down	--	--	Cellular Component: chloroplast thylakoid membrane (GO:0009535);; Cellular Component: photosystem I reaction center (GO:0009538);; Biological Process: photosynthesis (GO:0015979);;	K02692|7.68501e-146|mtr:MTR_5g006130|K02692 photosystem I subunit II | (RefSeq) photosystem I reaction center subunit II	ko00195:Photosynthesis	--	--	PsaD	Photosystem I reaction center subunit II, chloroplastic (Precursor) GN=psaD OS=Cucumis sativus (Cucumber) PE=1 SV=1	C	Energy production and conversion	Photosystem I reaction center subunit II [Medicago truncatula]
	F01_transcript/21977	51	53	36	5	7	10	116.74	130.11	103.67	20.36	29.44	31.54	1.06247e-08	-2.74156	down	--	--	Cellular Component: photosystem I reaction center (GO:0009538);; Biological Process: photosynthesis (GO:0015979);;	K02692|9.3886e-12|mtr:MTR_5g006130|K02692 photosystem I subunit II | (RefSeq) photosystem I reaction center subunit II	ko00195:Photosynthesis	--	--	--	Photosystem I reaction center subunit II, chloroplastic (Precursor) GN=psaD OS=Cucumis sativus (Cucumber) PE=1 SV=1	C	Energy production and conversion	Photosystem I reaction center subunit II [Medicago truncatula]
PsaF	F01_transcript/16432	540	368	460	7536	7701	7590	49.29	36.46	47.26	925.76	926.11	854.71	0	4.01313	up	--	--	Cellular Component: plastid (GO:0009536);; Cellular Component: photosystem I reaction center (GO:0009538);; Biological Process: photosynthesis (GO:0015979);; Cellular Component: integral component of membrane (GO:0016021);;	K02694|5.22106e-127|cam:101506661|K02694 photosystem I subunit III | (RefSeq) photosystem I reaction center subunit III, chloroplastic	ko00195:Photosynthesis	--	--	Photosystem I reaction centre subunit III	Photosystem I reaction center subunit III, chloroplastic (Precursor) GN=PSAF OS=Arabidopsis thaliana (Mouse-ear cress) PE=1 SV=1	S	Function unknown	unknown [Medicago truncatula]
	F01_transcript/16550	270	217	276	692	704	822	25.66	22.32	29.47	88.49	88.16	96.3	4.32353e-50	1.48103	up	--	--	Cellular Component: plastid (GO:0009536);; Cellular Component: photosystem I reaction center (GO:0009538);; Biological Process: photosynthesis (GO:0015979);; Cellular Component: integral component of membrane (GO:0016021);;	K02694|4.78987e-128|cam:101506661|K02694 photosystem I subunit III | (RefSeq) photosystem I reaction center subunit III, chloroplastic	ko00195:Photosynthesis	--	--	Photosystem I reaction centre subunit III	Photosystem I reaction center subunit III, chloroplastic (Precursor) GN=PSAF OS=Arabidopsis thaliana (Mouse-ear cress) PE=1 SV=1	S	Function unknown	unknown [Medicago truncatula]
	F01_transcript/15487	40256	34256	34842	10078	10604	10877	3022.35	2787.22	2932.97	1014.93	1044.31	1008.59	4.42328e-85	-1.84959	down	--	--	Cellular Component: plastid (GO:0009536);; Cellular Component: photosystem I reaction center (GO:0009538);; Biological Process: photosynthesis (GO:0015979);; Cellular Component: integral component of membrane (GO:0016021);;	K02694|9.91521e-126|cam:101506661|K02694 photosystem I subunit III | (RefSeq) photosystem I reaction center subunit III, chloroplastic	ko00195:Photosynthesis	--	--	Photosystem I reaction centre subunit III	Photosystem I reaction center subunit III, chloroplastic (Precursor) GN=PSAF OS=Arabidopsis thaliana (Mouse-ear cress) PE=1 SV=1	S	Function unknown	unknown [Medicago truncatula]
	F01_transcript/16057	8447	8063	7463	446	551	370	694.35	718.43	688.71	49.32	59.56	37.61	4.63729e-189	-4.18978	down	--	--	Cellular Component: plastid (GO:0009536);; Cellular Component: photosystem I reaction center (GO:0009538);; Biological Process: photosynthesis (GO:0015979);; Cellular Component: integral component of membrane (GO:0016021);;	K02694|5.71879e-95|cam:101506661|K02694 photosystem I subunit III | (RefSeq) photosystem I reaction center subunit III, chloroplastic	ko00195:Photosynthesis	--	--	Photosystem I reaction centre subunit III	Photosystem I reaction center subunit III, chloroplastic (Precursor) GN=PSAF OS=Flaveria trinervia (Clustered yellowtops) PE=2 SV=1	S	Function unknown	unknown [Medicago truncatula]
	F01_transcript/16943	28813	23575	25033	8485	8877	8788	2880.47	2556.3	2818.73	1144.06	1172.28	1083.66	1.71357e-89	-1.62059	down	--	--	Cellular Component: plastid (GO:0009536);; Cellular Component: photosystem I reaction center (GO:0009538);; Biological Process: photosynthesis (GO:0015979);; Cellular Component: integral component of membrane (GO:0016021);;	K02694|3.30479e-128|cam:101506661|K02694 photosystem I subunit III | (RefSeq) photosystem I reaction center subunit III, chloroplastic	ko00195:Photosynthesis	--	--	Photosystem I reaction centre subunit III	Photosystem I reaction center subunit III, chloroplastic (Precursor) GN=PSAF OS=Arabidopsis thaliana (Mouse-ear cress) PE=1 SV=1	S	Function unknown	unknown [Medicago truncatula]
PsaO	F01_transcript/18011	1966	1543	1728	4439	4503	4486	258.53	220.28	257.48	792.72	789	726.39	1.91114e-106	1.30546	up	--	--	Cellular Component: photosystem I (GO:0009522);; Biological Process: photosynthesis (GO:0015979);; Cellular Component: integral component of membrane (GO:0016021);; Molecular Function: chlorophyll binding (GO:0016168);;	K08905|4.75793e-95|cam:101488425|K08905 photosystem I subunit V | (RefSeq) photosystem I reaction center subunit V, chloroplastic	ko00195:Photosynthesis	--	--	Photosystem I psaG / psaK	Photosystem I reaction center subunit V, chloroplastic (Precursor) OS=Arabidopsis thaliana (Mouse-ear cress) PE=2 SV=1	I	Lipid transport and metabolism	unknown [Medicago truncatula]
	F01_transcript/17257	30456	23612	25394	9866	10095	10524	3641.91	3064.43	3432.26	1597.94	1603.37	1550.59	9.03039e-68	-1.43478	down	--	--	Cellular Component: photosystem I (GO:0009522);; Biological Process: photosynthesis (GO:0015979);; Cellular Component: integral component of membrane (GO:0016021);; Molecular Function: chlorophyll binding (GO:0016168);;	K08905|5.21412e-95|cam:101488425|K08905 photosystem I subunit V | (RefSeq) photosystem I reaction center subunit V, chloroplastic	ko00195:Photosynthesis	--	--	Photosystem I psaG / psaK	Photosystem I reaction center subunit V, chloroplastic (Precursor) OS=Arabidopsis thaliana (Mouse-ear cress) PE=2 SV=1	I	Lipid transport and metabolism	unknown [Medicago truncatula]
	F01_transcript/19756	2558	1926	1988	867	856	915	553.51	453.86	494.69	259.95	253.12	243.1	5.61328e-56	-1.34518	down	--	--	Biological Process: photosynthetic electron transport in photosystem I (GO:0009773);; Biological Process: photosynthetic NADP+ reduction (GO:0009780);; Cellular Component: integral component of membrane (GO:0016021);; Molecular Function: chlorophyll binding (GO:0016168);; Cellular Component: chloroplast photosystem I (GO:0030093);; Cellular Component: chloroplast membrane (GO:0031969);; Biologica…	K08905|2.31372e-68|cam:101488425|K08905 photosystem I subunit V | (RefSeq) photosystem I reaction center subunit V, chloroplastic	ko00195:Photosynthesis	--	--	Photosystem I psaG / psaK	Photosystem I reaction center subunit V, chloroplastic (Precursor) OS=Arabidopsis thaliana (Mouse-ear cress) PE=2 SV=1	I	Lipid transport and metabolism	unknown [Medicago truncatula]
beta	F01_transcript/8045	442	717	507	201	187	228	12.98	22.81	16.57	7.86	7.11	8.32	0.000931387	-1.52011	down	[C]	Energy production and conversion	Molecular Function: ATP binding (GO:0005524);; Cellular Component: plasma membrane (GO:0005886);; Cellular Component: chloroplast thylakoid membrane (GO:0009535);; Biological Process: ATP synthesis coupled proton transport (GO:0015986);; Biological Process: ATP hydrolysis coupled proton transport (GO:0015991);; Cellular Component: integral component of membrane (GO:0016021);; Cellular Component: …	K02112|0|mtr:MetrCp073|K02112 F-type H+-transporting ATPase subunit beta [EC:3.6.3.14] | (RefSeq) atpB; ATP synthase CF1 beta subunit	ko00190:Oxidative phosphorylation;ko00195:Photosynthesis	[C]	Energy production and conversion	ATP synthase alpha/beta family, nucleotide-binding domain;; ATP synthase alpha/beta family, beta-barrel domain;; ATPase family associated with various cellular activities (AAA);; ATP synthase, Delta/Epsilon chain, beta-sandwich domain;; ATP synthase, Delta/Epsilon chain, long alpha-helix domain	ATP synthase subunit beta, chloroplastic {ECO:0000255|HAMAP-Rule:MF_01347} OS=Medicago sativa (Alfalfa) PE=3 SV=1	C	Energy production and conversion	RecName: Full=ATP synthase subunit beta, chloroplastic; AltName: Full=ATP synthase F1 sector subunit beta; AltName: Full=F-ATPase subunit beta (chloroplast) [Medicago sativa]
alpha	F01_transcript/1971	570	709	507	269	232	240	10.43	14.04	10.3	6.54	5.5	5.45	1.45757e-05	-1.33823	down	[C]	Energy production and conversion	Molecular Function: ATP binding (GO:0005524);; Cellular Component: plasma membrane (GO:0005886);; Cellular Component: chloroplast thylakoid membrane (GO:0009535);; Biological Process: ATP synthesis coupled proton transport (GO:0015986);; Biological Process: ATP hydrolysis coupled proton transport (GO:0015991);; Cellular Component: proton-transporting ATP synthase complex, catalytic core F(1) (GO:…	K02111|0|cam:6797510|K02111 F-type H+-transporting ATPase subunit alpha [EC:3.6.3.14] | (RefSeq) atpA, CiarC_p026; ATP synthase CF1 alpha subunit	ko00190:Oxidative phosphorylation;ko00195:Photosynthesis	[C]	Energy production and conversion	ATP synthase alpha/beta family, nucleotide-binding domain;; ATP synthase alpha/beta chain, C terminal domain;; ATP synthase alpha/beta family, beta-barrel domain	ATP synthase subunit alpha, chloroplastic {ECO:0000255|HAMAP-Rule:MF_01346} OS=Lotus japonicus (Lotus corniculatus var. japonicus) PE=3 SV=1	C	Energy production and conversion	ATP synthase CF1 alpha subunit (chloroplast) [Medicago truncatula f. tricycla]
	F01_transcript/2407	676	477	564	2111	2101	2093	12.54	9.57	11.61	51.9	50.34	48.09	1.3639e-157	1.82848	up	[O]	Posttranslational modification, protein turnover, chaperones	Molecular Function: serine-type endopeptidase activity (GO:0004252);; Cellular Component: cell wall (GO:0005618);; Biological Process: proteolysis (GO:0006508);; Cellular Component: integral component of membrane (GO:0016021);;	--	--	--	--	Subtilase family;; 1,3-beta-glucan synthase subunit FKS1, domain-1	Callose synthase 5 OS=Arabidopsis thaliana (Mouse-ear cress) PE=1 SV=1	--	--	Serine protease aprX [Medicago truncatula]
gamma	F01_transcript/12175	3677	2944	3179	9223	9715	9900	155.84	135.11	150.22	520.68	535.31	519.16	4.18827e-133	1.50276	up	[C]	Energy production and conversion	Cellular Component: chloroplast thylakoid membrane (GO:0009535);; Biological Process: ATP synthesis coupled proton transport (GO:0015986);; Cellular Component: proton-transporting ATP synthase complex, catalytic core F(1) (GO:0045261);; Molecular Function: proton-transporting ATP synthase activity, rotational mechanism (GO:0046933);; Molecular Function: proton-transporting ATPase activity, rotati…	K02115|0|gmx:100797290|K02115 F-type H+-transporting ATPase subunit gamma | (RefSeq) ATP synthase gamma chain, chloroplastic	ko00190:Oxidative phosphorylation;ko00195:Photosynthesis	[C]	Energy production and conversion	ATP synthase	ATP synthase gamma chain, chloroplastic (Precursor) GN=ATPC OS=Pisum sativum (Garden pea) PE=2 SV=1	C	Energy production and conversion	unknown [Medicago truncatula]
	F01_transcript/11772	213	69	71	0	28	30	8.7	3.06	3.27	0	1.53	1.53	0.00952495	-2.63248	down	[C]	Energy production and conversion	Cellular Component: chloroplast thylakoid membrane (GO:0009535);; Biological Process: ATP synthesis coupled proton transport (GO:0015986);; Cellular Component: proton-transporting ATP synthase complex, catalytic core F(1) (GO:0045261);; Molecular Function: proton-transporting ATP synthase activity, rotational mechanism (GO:0046933);; Molecular Function: proton-transporting ATPase activity, rotati…	K02115|0|gmx:100797290|K02115 F-type H+-transporting ATPase subunit gamma | (RefSeq) ATP synthase gamma chain, chloroplastic	ko00190:Oxidative phosphorylation;ko00195:Photosynthesis	[C]	Energy production and conversion	ATP synthase	ATP synthase gamma chain, chloroplastic (Precursor) GN=ATPC OS=Pisum sativum (Garden pea) PE=2 SV=1	C	Energy production and conversion	unknown [Medicago truncatula]
	F01_transcript/11799	27211	22550	23640	8735	9237	9095	1130.82	1014.48	1094.87	483.41	498.93	467.64	6.32904e-79	-1.49448	down	[C]	Energy production and conversion	Cellular Component: chloroplast thylakoid membrane (GO:0009535);; Biological Process: ATP synthesis coupled proton transport (GO:0015986);; Cellular Component: proton-transporting ATP synthase complex, catalytic core F(1) (GO:0045261);; Molecular Function: proton-transporting ATP synthase activity, rotational mechanism (GO:0046933);; Molecular Function: proton-transporting ATPase activity, rotati…	K02115|0|gmx:100797290|K02115 F-type H+-transporting ATPase subunit gamma | (RefSeq) ATP synthase gamma chain, chloroplastic	ko00190:Oxidative phosphorylation;ko00195:Photosynthesis	[C]	Energy production and conversion	ATP synthase	ATP synthase gamma chain, chloroplastic (Precursor) GN=ATPC OS=Pisum sativum (Garden pea) PE=2 SV=1	C	Energy production and conversion	unknown [Medicago truncatula]
	F01_transcript/16305	1850	1352	1579	650	596	779	163.46	129.53	156.8	77.26	69.39	85	4.11738e-36	-1.29223	down	[C]	Energy production and conversion	Cellular Component: chloroplast thylakoid membrane (GO:0009535);; Biological Process: photosynthetic electron transport in photosystem II (GO:0009772);; Cellular Component: chloroplast envelope (GO:0009941);; Biological Process: ATP synthesis coupled proton transport (GO:0015986);; Cellular Component: proton-transporting ATP synthase complex, catalytic core F(1) (GO:0045261);; Molecular Function:…	K02115|6.06814e-139|vvi:100264091|K02115 F-type H+-transporting ATPase subunit gamma | (RefSeq) ATP synthase gamma chain, chloroplastic	ko00190:Oxidative phosphorylation;ko00195:Photosynthesis	[C]	Energy production and conversion	ATP synthase	ATP synthase gamma chain, chloroplastic (Precursor) GN=ATPC OS=Nicotiana tabacum (Common tobacco) PE=1 SV=1	C	Energy production and conversion	unknown [Medicago truncatula]
b	F01_transcript/18372	469	266	379	1776	1552	1871	67.89	41.79	62.33	349.65	299.93	332.79	2.66562e-51	2.18124	up	[C]	Energy production and conversion	Molecular Function: ATP binding (GO:0005524);; Cellular Component: chloroplast thylakoid membrane (GO:0009535);; Biological Process: response to cytokinin (GO:0009735);; Cellular Component: chloroplast envelope (GO:0009941);; Molecular Function: hydrogen ion transmembrane transporter activity (GO:0015078);; Biological Process: ATP synthesis coupled proton transport (GO:0015986);; Cellular Compone…	K02109|1.63874e-109|mtr:MTR_3g106820|K02109 F-type H+-transporting ATPase subunit b | (RefSeq) ATP synthase, F0 subunit B	ko00190:Oxidative phosphorylation;ko00195:Photosynthesis	--	--	ATP synthase B/B' CF(0)	ATP synthase subunit b&apos;, chloroplastic (Precursor) GN=ATPG OS=Spinacia oleracea (Spinach) PE=1 SV=2	U	Intracellular trafficking, secretion, and vesicular transport	ATP synthase [Medicago truncatula]
PsaK	F01_transcript/18849	3012	2214	2657	732	634	729	588.03	470.28	594.2	196.99	168.1	174.77	1.95866e-75	-1.96238	down	--	--	Cellular Component: photosystem I (GO:0009522);; Cellular Component: chloroplast thylakoid membrane (GO:0009535);; Biological Process: photosynthesis (GO:0015979);; Cellular Component: integral component of membrane (GO:0016021);; Molecular Function: chlorophyll binding (GO:0016168);;	K02698|2.43681e-69|cam:101506632|K02698 photosystem I subunit X | (RefSeq) photosystem I reaction center subunit psaK, chloroplastic	ko00195:Photosynthesis	--	--	Photosystem I psaG / psaK	Photosystem I reaction center subunit psaK, chloroplastic (Precursor) GN=PSAK OS=Medicago sativa (Alfalfa) PE=2 SV=1	S	Function unknown	unknown [Medicago truncatula]
	F01_transcript/19794	9943	7236	7694	2530	2299	2669	2312.43	1832.86	2062.43	817.58	733.79	761.23	8.79357e-59	-1.77916	down	--	--	Cellular Component: photosystem I (GO:0009522);; Cellular Component: chloroplast thylakoid membrane (GO:0009535);; Biological Process: photosynthesis (GO:0015979);; Cellular Component: integral component of membrane (GO:0016021);; Molecular Function: chlorophyll binding (GO:0016168);;	K02698|1.34844e-69|cam:101506632|K02698 photosystem I subunit X | (RefSeq) photosystem I reaction center subunit psaK, chloroplastic	ko00195:Photosynthesis	--	--	Photosystem I psaG / psaK	Photosystem I reaction center subunit psaK, chloroplastic (Precursor) GN=PSAK OS=Medicago sativa (Alfalfa) PE=2 SV=1	S	Function unknown	unknown [Medicago truncatula]
PsaL	F01_transcript/19553	25	16	26	714	620	729	5.28	3.81	6.26	204.05	174.62	185.14	3.23342e-143	4.89523	up	--	--	Molecular Function: protein binding (GO:0005515);; Cellular Component: chloroplast thylakoid membrane (GO:0009535);; Cellular Component: photosystem I reaction center (GO:0009538);; Cellular Component: plastoglobule (GO:0010287);; Cellular Component: integral component of membrane (GO:0016021);; Biological Process: photosynthesis, light reaction (GO:0019684);; Cellular Component: chloroplast memb…	K02699|2.12022e-40|mtr:MTR_7g079900|K02699 photosystem I subunit XI | (RefSeq) photosystem I reaction center subunit XI	ko00195:Photosynthesis	--	--	Photosystem I reaction centre subunit XI	Photosystem I reaction center subunit XI, chloroplastic (Precursor) GN=PSAL OS=Arabidopsis thaliana (Mouse-ear cress) PE=1 SV=2	C	Energy production and conversion	photosystem I subunit XI Mrna (chloroplast) [Solanum tuberosum]
	F01_transcript/17661	4511	3411	4216	614	566	646	539.48	442.7	569.85	99.48	89.95	95.29	2.30333e-106	-2.78604	down	--	--	Molecular Function: protein binding (GO:0005515);; Cellular Component: chloroplast thylakoid membrane (GO:0009535);; Cellular Component: photosystem I reaction center (GO:0009538);; Cellular Component: plastoglobule (GO:0010287);; Cellular Component: integral component of membrane (GO:0016021);; Biological Process: photosynthesis, light reaction (GO:0019684);; Cellular Component: chloroplast memb…	K02699|3.60832e-97|mtr:MTR_7g079900|K02699 photosystem I subunit XI | (RefSeq) photosystem I reaction center subunit XI	ko00195:Photosynthesis	--	--	Photosystem I reaction centre subunit XI	Photosystem I reaction center subunit XI, chloroplastic (Precursor) GN=PSAL OS=Arabidopsis thaliana (Mouse-ear cress) PE=1 SV=2	C	Energy production and conversion	Photosystem I reaction center subunit XI [Medicago truncatula]
PsaN	F01_transcript/17947	2190	1689	1514	6797	6475	6847	282.04	236.11	220.78	1187.62	1109.99	1085.59	1.76984e-147	1.85035	up	--	--	Cellular Component: photosystem I (GO:0009522);; Biological Process: photosynthesis (GO:0015979);;	K02701|4.45848e-101|mtr:MTR_3g095540|K02701 photosystem I subunit PsaN | (RefSeq) photosystem I reaction center subunit N	ko00195:Photosynthesis	--	--	Photosystem I reaction centre subunit N (PSAN or PSI-N)	Photosystem I reaction center subunit N, chloroplastic (Precursor) GN=PSAN OS=Arabidopsis thaliana (Mouse-ear cress) PE=1 SV=2	S	Function unknown	Photosystem I reaction center subunit N [Medicago truncatula]
	F01_transcript/17164	24519	20075	21617	5729	6021	6366	2683.31	2383.71	2669.09	847.42	872.66	858.93	2.27096e-146	-1.92579	down	--	--	Cellular Component: photosystem I (GO:0009522);; Biological Process: photosynthesis (GO:0015979);;	K02701|1.16724e-100|mtr:MTR_3g095540|K02701 photosystem I subunit PsaN | (RefSeq) photosystem I reaction center subunit N	ko00195:Photosynthesis	--	--	Photosystem I reaction centre subunit N (PSAN or PSI-N)	Photosystem I reaction center subunit N, chloroplastic (Precursor) GN=PSAN OS=Arabidopsis thaliana (Mouse-ear cress) PE=1 SV=2	S	Function unknown	Photosystem I reaction center subunit N [Medicago truncatula]
PsaO	F01_transcript/17041	7711	6205	6765	2261	2166	2227	906.44	791.68	898.56	359.97	337.99	322.61	8.44585e-174	-1.68951	down	--	--	Cellular Component: integral component of membrane (GO:0016021);;	K14332|6.7366e-83|cam:101500027|K14332 photosystem I subunit PsaO | (RefSeq) photosystem I subunit O	ko00195:Photosynthesis	--	--	--	Photosystem I subunit O (Precursor) GN=PSAO OS=Arabidopsis thaliana (Mouse-ear cress) PE=1 SV=1	S	Function unknown	unknown [Medicago truncatula]
	F01_transcript/18286	1918	1464	1551	796	775	832	260.31	215.77	238.56	146.91	140.37	138.99	3.10683e-59	-1.08897	down	--	--	Cellular Component: integral component of membrane (GO:0016021);;	K14332|7.45777e-84|cam:101500027|K14332 photosystem I subunit PsaO | (RefSeq) photosystem I subunit O	ko00195:Photosynthesis	--	--	--	Photosystem I subunit O (Precursor) GN=PSAO OS=Arabidopsis thaliana (Mouse-ear cress) PE=1 SV=1	S	Function unknown	unknown [Medicago truncatula]
	F01_transcript/19919	124	111	126	67	43	49	28.99	28.23	34.03	21.92	13.9	14.21	1.04142e-06	-1.23754	down	--	--	Cellular Component: chloroplast (GO:0009507);; Cellular Component: integral component of membrane (GO:0016021);;	K14332|4.19344e-44|cam:101500027|K14332 photosystem I subunit PsaO | (RefSeq) photosystem I subunit O	ko00195:Photosynthesis	--	--	--	Photosystem I subunit O (Precursor) GN=PSAO OS=Arabidopsis thaliana (Mouse-ear cress) PE=1 SV=1	S	Function unknown	unknown [Medicago truncatula]
C_L_vs_S_L (S4)
Component		T16_Count	T17_Count	T18_Count	T22_Count	T23_Count	T24_Count	T16_FPKM	T17_FPKM	T18_FPKM	T22_FPKM	T23_FPKM	T24_FPKM	FDR	log2FC	regulated	COG_class	COG_class_annotation	GO_annotation	KEGG_annotation	KEGG_pathway	KOG_class	KOG_class_annotation	Pfam_annotation	Swissprot_annotation	eggNOG_class	eggNOG_class_annotation	nr_annotation
PsbA	F01_transcript/14235	293	353	263	757	605	813	20.1	22.24	18.7	60.83	47.49	60.39	1.20627e-10	1.12389	up	--	--	Molecular Function: iron ion binding (GO:0005506);; Cellular Component: photosystem II (GO:0009523);; Cellular Component: chloroplast thylakoid membrane (GO:0009535);; Biological Process: response to herbicide (GO:0009635);; Biological Process: photosynthetic electron transport in photosystem II (GO:0009772);; Molecular Function: oxygen evolving activity (GO:0010242);; Cellular Component: integra…	K02703|6.08668e-143|mtr:MTR_7g021750|K02703 photosystem II P680 reaction center D1 protein [EC:1.10.3.9] | (RefSeq) photosystem II Q(B) protein	ko00195:Photosynthesis	--	--	Photosynthetic reaction centre protein	Photosystem II protein D1 {ECO:0000255|HAMAP-Rule:MF_01379} (Precursor) OS=Medicago sativa (Alfalfa) PE=3 SV=1	C	Energy production and conversion	photosystem II protein D1 (chloroplast) [Macadamia integrifolia]
PsbB	F01_transcript/2102	227	303	192	1075	1084	1154	4.71	5.87	4.18	26.45	26.01	26.54	2.95817e-105	2.06797	up	[C]	Energy production and conversion	Cellular Component: photosystem II (GO:0009523);; Cellular Component: chloroplast thylakoid membrane (GO:0009535);; Biological Process: photosynthetic electron transport in photosystem II (GO:0009772);; Cellular Component: integral component of membrane (GO:0016021);; Molecular Function: chlorophyll binding (GO:0016168);; Biological Process: protein-chromophore linkage (GO:0018298);; Molecular Fu…	K02704|0|mtr:MTR_4g051370|K02704 photosystem II CP47 chlorophyll apoprotein | (RefSeq) photosystem II CP47 chlorophyll A apoprotein	ko00195:Photosynthesis	--	--	Photosystem II protein;; Cytochrome b/b6/petB;; Cytochrome b(N-terminal)/b6/petB;; Photosystem II 10 kDa phosphoprotein	Photosystem II CP47 reaction center protein {ECO:0000255|HAMAP-Rule:MF_01495} OS=Cicer arietinum (Chickpea) PE=3 SV=1	S	Function unknown	Photosystem II CP47 chlorophyll apoprotein [Medicago truncatula]
	F01_transcript/210	158	32	143	0	0	22	2.18	0.42	2.08	0	0	0.34	0.00103606	-4.1332	down	[C]	Energy production and conversion	Cellular Component: photosystem II (GO:0009523);; Cellular Component: chloroplast thylakoid membrane (GO:0009535);; Biological Process: photosynthetic electron transport in photosystem II (GO:0009772);; Cellular Component: integral component of membrane (GO:0016021);; Molecular Function: chlorophyll binding (GO:0016168);; Biological Process: protein-chromophore linkage (GO:0018298);; Molecular Fu…	K02704|0|mtr:MTR_4g051370|K02704 photosystem II CP47 chlorophyll apoprotein | (RefSeq) photosystem II CP47 chlorophyll A apoprotein	ko00195:Photosynthesis	--	--	Photosystem II protein;; Cytochrome b/b6/petB;; Cytochrome b(N-terminal)/b6/petB;; Photosystem II 10 kDa phosphoprotein	Photosystem II CP47 reaction center protein {ECO:0000255|HAMAP-Rule:MF_01495} OS=Cicer arietinum (Chickpea) PE=3 SV=1	S	Function unknown	Photosystem II CP47 chlorophyll apoprotein [Medicago truncatula]
PetB	F01_transcript/12457	19	15	6	81	121	81	1	0.72	0.32	4.97	7.21	4.57	4.67771e-10	2.69827	up	[C]	Energy production and conversion	Molecular Function: iron ion binding (GO:0005506);; Cellular Component: cytochrome b6f complex (GO:0009512);; Cellular Component: chloroplast thylakoid membrane (GO:0009535);; Cellular Component: integral component of membrane (GO:0016021);; Molecular Function: oxidoreductase activity (GO:0016491);; Biological Process: photosynthesis, light reaction (GO:0019684);; Molecular Function: heme binding…	K02635|4.45022e-109|cam:6797553|K02635 cytochrome b6 | (RefSeq) petB, CiarC_p049; cytochrome b6	ko00195:Photosynthesis	[C]	Energy production and conversion	Cytochrome b(C-terminal)/b6/petD;; Cytochrome b/b6/petB;; Domain of unknown function (DUF4405)	Cytochrome b6 {ECO:0000255|HAMAP-Rule:MF_00633} OS=Oenothera elata subsp. hookeri (Hooker&apos;s evening primrose) PE=3 SV=2	C	Energy production and conversion	unknown [Medicago truncatula]
	F01_transcript/413	35	37	31	255	224	213	0.54	0.53	0.49	4.57	3.9	3.57	7.78234e-32	2.61429	up	[C]	Energy production and conversion	Molecular Function: iron ion binding (GO:0005506);; Cellular Component: chloroplast thylakoid membrane (GO:0009535);; Biological Process: photosynthesis (GO:0015979);; Cellular Component: integral component of membrane (GO:0016021);; Molecular Function: oxidoreductase activity (GO:0016491);; Molecular Function: heme binding (GO:0020037);; Biological Process: respiratory electron transport chain (…	K02635|3.69234e-141|cmo:103504414|K02635 cytochrome b6 | (RefSeq) cytochrome b6	ko00195:Photosynthesis	[C]	Energy production and conversion	Cytochrome b/b6/petB;; Cytochrome b(N-terminal)/b6/petB;; Photosystem II protein;; Cytochrome b(C-terminal)/b6/petD;; Photosystem II 10 kDa phosphoprotein	Cytochrome b6 {ECO:0000255|HAMAP-Rule:MF_00633} OS=Oenothera elata subsp. hookeri (Hooker&apos;s evening primrose) PE=3 SV=2	C	Energy production and conversion	PREDICTED: LOW QUALITY PROTEIN: cytochrome b6, partial [Cucumis melo]
PetC	F01_transcript/21686	122	197	172	388	360	459	272.15	333.5	346.24	915.97	898.73	873.94	8.88965e-12	1.15877	up	[C]	Energy production and conversion	Molecular Function: plastoquinol--plastocyanin reductase activity (GO:0009496);; Cellular Component: chloroplast thylakoid membrane (GO:0009535);; Biological Process: photosynthesis (GO:0015979);; Cellular Component: integral component of membrane (GO:0016021);; Molecular Function: electron transporter, transferring electrons within cytochrome b6/f complex of photosystem II activity (GO:0045158);…	K02636|5.30929e-27|mtr:MTR_2g089510|K02636 cytochrome b6-f complex iron-sulfur subunit [EC:1.10.9.1] | (RefSeq) cytochrome b6-F complex iron-sulfur subunit	ko00195:Photosynthesis	[C]	Energy production and conversion	--	Cytochrome b6-f complex iron-sulfur subunit, chloroplastic (Precursor) GN=petC OS=Pisum sativum (Garden pea) PE=2 SV=1	C	Energy production and conversion	Cytochrome b6-f complex iron-sulfur subunit [Medicago truncatula]
PsbP	F01_transcript/16393	395	437	337	1758	1818	1880	41.14	41.32	36.04	212.39	215.07	208.38	1.83635e-158	2.08728	up	--	--	Molecular Function: calcium ion binding (GO:0005509);; Cellular Component: chloroplast (GO:0009507);; Cellular Component: photosystem II oxygen evolving complex (GO:0009654);; Biological Process: photosynthesis (GO:0015979);; Cellular Component: extrinsic component of membrane (GO:0019898);; Cellular Component: thylakoid lumen (GO:0031977);;	K02717|3.1502e-140|cam:101510219|K02717 photosystem II oxygen-evolving enhancer protein 2 | (RefSeq) psbP-like protein 1, chloroplastic	ko00195:Photosynthesis	--	--	PsbP	PsbP-like protein 1, chloroplastic (Precursor) GN=PPL1 OS=Arabidopsis thaliana (Mouse-ear cress) PE=1 SV=1	G	Carbohydrate transport and metabolism	oxygen-evolving complex/thylakoid lumenal 25.6 kDa protein [Medicago truncatula]
	F01_transcript/15420	7971	7756	7382	1827	1892	1792	681.7	606.57	652.4	182.57	184.81	164.83	2.53762e-251	-2.20725	down	--	--	Molecular Function: calcium ion binding (GO:0005509);; Cellular Component: chloroplast thylakoid membrane (GO:0009535);; Cellular Component: photosystem II oxygen evolving complex (GO:0009654);; Biological Process: photosynthesis (GO:0015979);; Cellular Component: extrinsic component of membrane (GO:0019898);;	K02717|1.90406e-150|cam:101514916|K02717 photosystem II oxygen-evolving enhancer protein 2 | (RefSeq) oxygen-evolving enhancer protein 2, chloroplastic	ko00195:Photosynthesis	--	--	PsbP	Oxygen-evolving enhancer protein 2, chloroplastic (Precursor) GN=PSBP OS=Pisum sativum (Garden pea) PE=1 SV=1	S	Function unknown	unknown [Medicago truncatula]
	F01_transcript/21099	785	990	811	380	316	398	800.75	791.04	755.64	410.31	348.02	354.07	3.93171e-30	-1.37741	down	--	--	Molecular Function: calcium ion binding (GO:0005509);; Cellular Component: chloroplast thylakoid membrane (GO:0009535);; Cellular Component: photosystem II oxygen evolving complex (GO:0009654);; Biological Process: photosynthesis (GO:0015979);; Cellular Component: extrinsic component of membrane (GO:0019898);;	K02717|2.83282e-44|cam:101514916|K02717 photosystem II oxygen-evolving enhancer protein 2 | (RefSeq) oxygen-evolving enhancer protein 2, chloroplastic	ko00195:Photosynthesis	--	--	--	Oxygen-evolving enhancer protein 2, chloroplastic (Precursor) GN=PSBP OS=Pisum sativum (Garden pea) PE=1 SV=1	S	Function unknown	oxygen-evolving enhancer protein 2-1 [Medicago truncatula]
PsbQ	F01_transcript/17015	531	538	493	1133	1158	1357	60.63	55.63	57.66	149.76	149.98	164.14	8.37749e-38	1.08237	up	--	--	Molecular Function: calcium ion binding (GO:0005509);; Cellular Component: photosystem II oxygen evolving complex (GO:0009654);; Biological Process: photosynthesis (GO:0015979);; Cellular Component: extrinsic component of membrane (GO:0019898);;	K08901|1.42034e-110|mtr:MTR_5g041910|K08901 photosystem II oxygen-evolving enhancer protein 3 | (RefSeq) oxygen-evolving enhancer protein	ko00195:Photosynthesis	--	--	Oxygen evolving enhancer protein 3 (PsbQ)	PsbQ-like protein 1, chloroplastic (Precursor) GN=F7A19.23 OS=Arabidopsis thaliana (Mouse-ear cress) PE=1 SV=1	S	Function unknown	Oxygen-evolving enhancer protein 3-2 [Medicago truncatula]
	F01_transcript/15600	32889	32009	27454	11917	11947	11770	3047.52	2704.66	2623.08	1286.91	1262.08	1168.6	1.06711e-62	-1.51089	down	--	--	Molecular Function: calcium ion binding (GO:0005509);; Cellular Component: photosystem II oxygen evolving complex (GO:0009654);; Biological Process: photosynthesis (GO:0015979);; Cellular Component: extrinsic component of membrane (GO:0019898);;	K08901|1.31713e-116|cam:101495316|K08901 photosystem II oxygen-evolving enhancer protein 3 | (RefSeq) oxygen-evolving enhancer protein 3, chloroplastic-like	ko00195:Photosynthesis	--	--	Oxygen evolving enhancer protein 3 (PsbQ)	Oxygen-evolving enhancer protein 3-2, chloroplastic (Precursor) GN=C17L7.100 OS=Arabidopsis thaliana (Mouse-ear cress) PE=1 SV=2	S	Function unknown	unknown [Medicago truncatula]
	F01_transcript/17244	535	606	582	119	101	146	68.84	70.19	76.42	17.66	14.67	19.74	2.20336e-77	-2.37807	down	--	--	Molecular Function: calcium ion binding (GO:0005509);; Cellular Component: photosystem II oxygen evolving complex (GO:0009654);; Biological Process: photosynthesis (GO:0015979);; Cellular Component: extrinsic component of membrane (GO:0019898);;	K08901|3.0785e-104|mtr:MTR_5g041910|K08901 photosystem II oxygen-evolving enhancer protein 3 | (RefSeq) oxygen-evolving enhancer protein	ko00195:Photosynthesis	--	--	Oxygen evolving enhancer protein 3 (PsbQ)	PsbQ-like protein 1, chloroplastic (Precursor) GN=F7A19.23 OS=Arabidopsis thaliana (Mouse-ear cress) PE=1 SV=1	S	Function unknown	unknown [Medicago truncatula]
	F01_transcript/17850	71	69	63	27	34	23	10.63	9.24	9.57	4.71	5.71	3.65	2.69121e-05	-1.40893	down	--	--	Molecular Function: calcium ion binding (GO:0005509);; Cellular Component: photosystem II oxygen evolving complex (GO:0009654);; Biological Process: photosynthesis (GO:0015979);; Cellular Component: extrinsic component of membrane (GO:0019898);;	K08901|2.20564e-71|cam:101513108|K08901 photosystem II oxygen-evolving enhancer protein 3 | (RefSeq) photosynthetic NDH subunit of lumenal location 2, chloroplastic	ko00195:Photosynthesis	--	--	Oxygen evolving enhancer protein 3 (PsbQ)	PsbQ-like protein 1, chloroplastic (Precursor) GN=F7A19.23 OS=Arabidopsis thaliana (Mouse-ear cress) PE=1 SV=1	S	Function unknown	PREDICTED: LOW QUALITY PROTEIN: psbQ-like protein 1, chloroplastic-like [Cicer arietinum]
	F01_transcript/8383	430	519	386	229	252	219	14.76	16.61	13.9	9.32	10.02	8.34	2.04428e-17	-1.06368	down	--	--	Molecular Function: calcium ion binding (GO:0005509);; Cellular Component: photosystem II oxygen evolving complex (GO:0009654);; Biological Process: photosynthesis (GO:0015979);; Cellular Component: extrinsic component of membrane (GO:0019898);;	K08901|1.21548e-44|cam:101495316|K08901 photosystem II oxygen-evolving enhancer protein 3 | (RefSeq) oxygen-evolving enhancer protein 3, chloroplastic-like	ko00195:Photosynthesis	--	--	Oxygen evolving enhancer protein 3 (PsbQ)	Oxygen-evolving enhancer protein 3-2, chloroplastic (Precursor) GN=C17L7.100 OS=Arabidopsis thaliana (Mouse-ear cress) PE=1 SV=2	S	Function unknown	oxygen-evolving enhancer protein [Medicago truncatula]
PsbR	F01_transcript/17125	13899	16038	13653	43248	43515	47971	1786.74	1855.09	1790.79	6409.34	6319.59	6484.6	2.75045e-151	1.49002	up	--	--	Cellular Component: photosystem II oxygen evolving complex (GO:0009654);; Biological Process: photosynthesis (GO:0015979);; Cellular Component: integral component of membrane (GO:0016021);;	K03541|1.38076e-71|mtr:MTR_2g064650|K03541 photosystem II 10kDa protein | (RefSeq) photosystem II 10 kDa proteinPsbR protein	ko00195:Photosynthesis	--	--	Photosystem II 10 kDa polypeptide PsbR	Photosystem II 10 kDa polypeptide, chloroplastic (Precursor) GN=PSBR OS=Solanum tuberosum (Potato) PE=2 SV=1	S	Function unknown	Photosystem II 10 kDa polypeptide [Medicago truncatula]
	F01_transcript/18244	71	88	40	33	19	13	14.32	15.56	8	7.46	4.28	2.77	0.000409168	-1.72432	down	--	--	Cellular Component: photosystem II oxygen evolving complex (GO:0009654);; Biological Process: photosynthesis (GO:0015979);; Cellular Component: integral component of membrane (GO:0016021);;	K03541|1.65183e-70|mtr:MTR_2g064650|K03541 photosystem II 10kDa protein | (RefSeq) photosystem II 10 kDa proteinPsbR protein	ko00195:Photosynthesis	--	--	Photosystem II 10 kDa polypeptide PsbR	Photosystem II 10 kDa polypeptide, chloroplastic (Precursor) GN=PSBR OS=Solanum tuberosum (Potato) PE=2 SV=1	S	Function unknown	Photosystem II 10 kDa polypeptide [Medicago truncatula]
	F01_transcript/18873	43718	50608	37577	12086	11907	13341	10047.7	10100.8	8568.12	3113.39	3020.31	3068.98	9.94725e-48	-1.95577	down	--	--	Cellular Component: photosystem II oxygen evolving complex (GO:0009654);; Biological Process: photosynthesis (GO:0015979);; Cellular Component: integral component of membrane (GO:0016021);;	K03541|5.49525e-70|mtr:MTR_2g064650|K03541 photosystem II 10kDa protein | (RefSeq) photosystem II 10 kDa proteinPsbR protein	ko00195:Photosynthesis	--	--	Photosystem II 10 kDa polypeptide PsbR	Photosystem II 10 kDa polypeptide, chloroplastic (Precursor) GN=PSBR OS=Solanum tuberosum (Potato) PE=2 SV=1	S	Function unknown	Photosystem II 10 kDa polypeptide [Medicago truncatula]
PsbW	F01_transcript/20233	513	618	449	1147	1069	1464	220.59	220.02	184.15	534.09	494.98	588.5	1.62785e-09	1.08308	up	--	--	Cellular Component: chloroplast (GO:0009507);; Cellular Component: photosystem II (GO:0009523);; Biological Process: photosynthesis (GO:0015979);; Cellular Component: integral component of membrane (GO:0016021);;	K02721|8.1388e-35|cam:101513777|K02721 photosystem II PsbW protein | (RefSeq) photosystem II reaction center W protein, chloroplastic-like	ko00195:Photosynthesis	--	--	Photosystem II reaction centre W protein (PsbW)	Photosystem II reaction center W protein, chloroplastic (Precursor) GN=psbW OS=Spinacia oleracea (Spinach) PE=1 SV=1	S	Function unknown	photosystem II reaction center W [Medicago truncatula]
PetE	F01_transcript/16910	179	315	222	952	968	971	20.94	33.26	26.61	128.63	128.14	120	1.50463e-78	1.88312	up	[C]	Energy production and conversion	Molecular Function: copper ion binding (GO:0005507);; Molecular Function: electron carrier activity (GO:0009055);; Cellular Component: chloroplast thylakoid membrane (GO:0009535);; Cellular Component: integral component of membrane (GO:0016021);; Biological Process: oxidation-reduction process (GO:0055114);;	K02638|2.67661e-93|mtr:MTR_3g114850|K02638 plastocyanin | (RefSeq) plastocyanin	ko00195:Photosynthesis	--	--	Copper binding proteins, plastocyanin/azurin family;; Cupredoxin-like domain	Plastocyanin, chloroplastic (Precursor) GN=PETE OS=Pisum sativum (Garden pea) PE=4 SV=1	C	Energy production and conversion	Plastocyanin [Medicago truncatula]
PetF	F01_transcript/15566	154	210	145	697	734	687	13.46	16.7	13.09	70.83	72.97	64.25	2.99253e-62	1.92645	up	[C]	Energy production and conversion	Molecular Function: electron carrier activity (GO:0009055);; Cellular Component: chloroplast (GO:0009507);; Biological Process: electron transport chain (GO:0022900);; Molecular Function: metal ion binding (GO:0046872);; Molecular Function: 2 iron, 2 sulfur cluster binding (GO:0051537);;	K02639|3.4633e-124|mtr:MTR_4g098490|K02639 ferredoxin | (RefSeq) 2Fe-2S ferredoxin superfamily protein	ko00195:Photosynthesis	--	--	2Fe-2S iron-sulfur cluster binding domain	Ferredoxin-A OS=Alocasia macrorrhizos (Giant taro) PE=1 SV=1	C	Energy production and conversion	Ferredoxin-6 [Medicago truncatula]
	F01_transcript/17401	919	1024	881	1985	2220	2049	133.08	132.52	129.54	329.58	361.53	309.17	3.09093e-44	1.01	up	[C]	Energy production and conversion	Molecular Function: protein binding (GO:0005515);; Molecular Function: electron carrier activity (GO:0009055);; Cellular Component: chloroplast (GO:0009507);; Biological Process: electron transport chain (GO:0022900);; Molecular Function: metal ion binding (GO:0046872);; Molecular Function: 2 iron, 2 sulfur cluster binding (GO:0051537);;	K02639|1.73835e-82|mtr:MTR_2g006290|K02639 ferredoxin | (RefSeq) 2Fe-2S ferredoxin superfamily protein	ko00195:Photosynthesis	--	--	2Fe-2S iron-sulfur cluster binding domain	Ferredoxin-1, chloroplastic (Precursor) GN=PETF OS=Pisum sativum (Garden pea) PE=1 SV=2	C	Energy production and conversion	Ferredoxin I [Medicago truncatula]
	F01_transcript/17777	125	141	107	416	437	400	18	18.17	15.65	68.74	70.82	60.09	1.53021e-29	1.61495	up	[C]	Energy production and conversion	Molecular Function: electron carrier activity (GO:0009055);; Cellular Component: chloroplast (GO:0009507);; Biological Process: electron transport chain (GO:0022900);; Molecular Function: metal ion binding (GO:0046872);; Molecular Function: 2 iron, 2 sulfur cluster binding (GO:0051537);;	K02639|4.16313e-98|mtr:MTR_5g006320|K02639 ferredoxin | (RefSeq) 2Fe-2S ferredoxin superfamily protein	ko00195:Photosynthesis	--	--	2Fe-2S iron-sulfur cluster binding domain	Ferredoxin-3, chloroplastic (Precursor) GN=FD3 OS=Arabidopsis thaliana (Mouse-ear cress) PE=1 SV=1	C	Energy production and conversion	Ferredoxin [Medicago truncatula]
PetH	F01_transcript/11279	117	165	145	461	415	588	5.23	6.85	6.77	24.25	21.31	28.74	9.62495e-14	1.63686	up	[P]	Inorganic ion transport and metabolism	Molecular Function: ferredoxin-NADP+ reductase activity (GO:0004324);; Molecular Function: protein binding (GO:0005515);; Molecular Function: poly(U) RNA binding (GO:0008266);; Cellular Component: chloroplast thylakoid membrane (GO:0009535);; Cellular Component: chloroplast stroma (GO:0009570);; Biological Process: photosynthetic electron transport chain (GO:0009767);; Cellular Component: chlorop…	K02641|2.56266e-162|mtr:MTR_5g022300|K02641 ferredoxin--NADP+ reductase [EC:1.18.1.2] | (RefSeq) leaf ferredoxin-NADP reductase	ko00195:Photosynthesis	[C]	Energy production and conversion	Oxidoreductase NAD-binding domain;; Oxidoreductase FAD-binding domain;; Oxidoreductase NAD-binding domain	Ferredoxin--NADP reductase, chloroplastic (Precursor) GN=PETH OS=Vicia faba (Broad bean) PE=2 SV=1	P	Inorganic ion transport and metabolism	leaf ferredoxin-NADP reductase [Medicago truncatula]
	F01_transcript/13104	4	14	4	78	109	96	0.27	0.75	0.29	5.22	7.08	5.91	2.50071e-19	3.57789	up	[P]	Inorganic ion transport and metabolism	Molecular Function: ferredoxin-NADP+ reductase activity (GO:0004324);; Molecular Function: protein binding (GO:0005515);; Molecular Function: poly(U) RNA binding (GO:0008266);; Cellular Component: chloroplast thylakoid membrane (GO:0009535);; Cellular Component: chloroplast stroma (GO:0009570);; Biological Process: photosynthetic electron transport chain (GO:0009767);; Cellular Component: chlorop…	K02641|0|mtr:MTR_5g022300|K02641 ferredoxin--NADP+ reductase [EC:1.18.1.2] | (RefSeq) leaf ferredoxin-NADP reductase	ko00195:Photosynthesis	[C]	Energy production and conversion	Oxidoreductase NAD-binding domain;; Oxidoreductase FAD-binding domain	Ferredoxin--NADP reductase, chloroplastic (Precursor) GN=PETH OS=Vicia faba (Broad bean) PE=2 SV=1	P	Inorganic ion transport and metabolism	Ferredoxin-NADP reductase [Medicago truncatula]
	F01_transcript/13117	3067	3132	2873	9744	10252	9936	162.73	153.82	159.06	609.76	626.34	576.87	3.88494e-173	1.58345	up	[P]	Inorganic ion transport and metabolism	Molecular Function: nucleotide binding (GO:0000166);; Molecular Function: ferredoxin-NADP+ reductase activity (GO:0004324);; Molecular Function: protein binding (GO:0005515);; Molecular Function: poly(U) RNA binding (GO:0008266);; Cellular Component: chloroplast thylakoid membrane (GO:0009535);; Cellular Component: chloroplast stroma (GO:0009570);; Biological Process: photosynthetic electron tran…	K02641|0|mtr:MTR_5g022300|K02641 ferredoxin--NADP+ reductase [EC:1.18.1.2] | (RefSeq) leaf ferredoxin-NADP reductase	ko00195:Photosynthesis	[C]	Energy production and conversion	Oxidoreductase NAD-binding domain;; Oxidoreductase FAD-binding domain	Ferredoxin--NADP reductase, leaf isozyme, chloroplastic (Precursor) GN=PETH OS=Pisum sativum (Garden pea) PE=1 SV=1	P	Inorganic ion transport and metabolism	Ferredoxin-NADP reductase [Medicago truncatula]
PsbY	F01_transcript/19414	3	2	0	822	838	963	0.76	0.44	0	227.75	229.04	237.45	8.15886e-304	8.91923	up	--	--	Cellular Component: photosystem II (GO:0009523);; Biological Process: photosynthesis (GO:0015979);; Cellular Component: integral component of membrane (GO:0016021);; Molecular Function: manganese ion binding (GO:0030145);;	K02723|8.02518e-79|mtr:MTR_3g086230|K02723 photosystem II PsbY protein | (RefSeq) photosystem II core complex family psbY protein	ko00195:Photosynthesis	--	--	Photosystem II protein Y (PsbY)	Photosystem II protein psbY-2, chloroplastic (Precursor) GN=PSBY OS=Spinacia oleracea (Spinach) PE=1 SV=2	I	Lipid transport and metabolism	unknown [Medicago truncatula]
Psb27	F01_transcript/17718	168	192	192	619	688	765	26.04	26.46	30.13	109.25	119.08	122.52	3.70187e-54	1.7649	up	--	--	Cellular Component: chloroplast thylakoid lumen (GO:0009543);; Biological Process: photosystem II repair (GO:0010206);; Biological Process: photosystem II assembly (GO:0010207);;	K08902|4.7607e-76|cam:101500783|K08902 photosystem II Psb27 protein | (RefSeq) photosystem II repair protein PSB27-H1, chloroplastic	ko00195:Photosynthesis	--	--	Photosystem II Pbs27	Photosystem II repair protein PSB27-H1, chloroplastic (Precursor) OS=Arabidopsis thaliana (Mouse-ear cress) PE=1 SV=1	G	Carbohydrate transport and metabolism	photosystem II Pbs27 protein [Medicago truncatula]
	F01_transcript/17189	379	501	619	291	232	236	47.03	55.97	78.42	41.68	32.62	30.91	0.000870899	-1.1246	down	--	--	Cellular Component: chloroplast thylakoid lumen (GO:0009543);; Biological Process: photosystem II repair (GO:0010206);; Biological Process: photosystem II assembly (GO:0010207);;	K08902|5.02003e-74|cam:101500783|K08902 photosystem II Psb27 protein | (RefSeq) photosystem II repair protein PSB27-H1, chloroplastic	ko00195:Photosynthesis	--	--	Photosystem II Pbs27	Photosystem II repair protein PSB27-H1, chloroplastic (Precursor) OS=Arabidopsis thaliana (Mouse-ear cress) PE=1 SV=1	G	Carbohydrate transport and metabolism	photosystem II Pbs27 protein [Medicago truncatula]
PsaA	F01_transcript/333	194	118	363	1337	1299	1533	2.87	1.64	5.65	23.48	22.23	25.21	1.5163e-37	2.45774	up	[M]	Cell wall/membrane/envelope biogenesis	Molecular Function: magnesium ion binding (GO:0000287);; Molecular Function: electron carrier activity (GO:0009055);; Cellular Component: photosystem I (GO:0009522);; Cellular Component: chloroplast thylakoid membrane (GO:0009535);; Biological Process: photosynthesis (GO:0015979);; Cellular Component: integral component of membrane (GO:0016021);; Molecular Function: chlorophyll binding (GO:001616…	K02689|0|mtr:MetrCp066|K02689 photosystem I P700 chlorophyll a apoprotein A1 | (RefSeq) psaA; photosystem I P700 chlorophyll a apoprotein A1	ko00195:Photosynthesis	--	--	Photosystem I psaA/psaB protein;; Photosystem I psaA/psaB protein;; Photosystem I psaA/psaB protein;; Ribosomal protein S14p/S29e	Photosystem I P700 chlorophyll a apoprotein A1 {ECO:0000255|HAMAP-Rule:MF_00458} GN=CsCp034 OS=Cucumis sativus (Cucumber) PE=3 SV=1	C	Energy production and conversion	photosystem I P700 apoprotein A1 [Medicago truncatula]
	F01_transcript/13	1682	1788	1396	802	847	829	17	17.01	14.92	9.69	9.97	9.39	4.46681e-31	-1.10873	down	[M]	Cell wall/membrane/envelope biogenesis	Molecular Function: magnesium ion binding (GO:0000287);; Molecular Function: electron carrier activity (GO:0009055);; Cellular Component: photosystem I (GO:0009522);; Cellular Component: chloroplast thylakoid membrane (GO:0009535);; Biological Process: photosynthesis (GO:0015979);; Cellular Component: integral component of membrane (GO:0016021);; Molecular Function: chlorophyll binding (GO:001616…	K02689|0|mtr:MetrCp066|K02689 photosystem I P700 chlorophyll a apoprotein A1 | (RefSeq) psaA; photosystem I P700 chlorophyll a apoprotein A1	ko00195:Photosynthesis	--	--	Photosystem I psaA/psaB protein;; Photosystem I psaA/psaB protein;; Tetratricopeptide repeat;; Tetratricopeptide repeat;; Tetratricopeptide repeat;; Tetratricopeptide repeat;; TPR repeat;; Tetratricopeptide repeat;; Tetratricopeptide repeat;; Tetratricopeptide repeat;; Ribosomal protein S14p/S29e	Photosystem I P700 chlorophyll a apoprotein A1 {ECO:0000255|HAMAP-Rule:MF_00458} OS=Pisum sativum (Garden pea) PE=1 SV=2	C	Energy production and conversion	photosystem I P700 chlorophyll A apoprotein A2 [Medicago truncatula]
PsaB	F01_transcript/5145	208	100	147	61	39	0	5.58	2.53	4.17	1.98	1.22	0.03	0.000277711	-2.30879	down	[M]	Cell wall/membrane/envelope biogenesis	Molecular Function: magnesium ion binding (GO:0000287);; Molecular Function: electron carrier activity (GO:0009055);; Cellular Component: photosystem I (GO:0009522);; Cellular Component: chloroplast thylakoid membrane (GO:0009535);; Biological Process: photosynthesis (GO:0015979);; Cellular Component: integral component of membrane (GO:0016021);; Molecular Function: chlorophyll binding (GO:001616…	K02690|0|mtr:MTR_3g035600|K02690 photosystem I P700 chlorophyll a apoprotein A2 | (RefSeq) photosystem I P700 chlorophyll A apoprotein A2	ko00195:Photosynthesis	--	--	Photosystem I psaA/psaB protein;; Ribosomal protein S14p/S29e;; Photosystem I psaA/psaB protein	Photosystem I P700 chlorophyll a apoprotein A2 {ECO:0000255|HAMAP-Rule:MF_00482} OS=Lotus japonicus (Lotus corniculatus var. japonicus) PE=3 SV=1	C	Energy production and conversion	photosystem I P700 chlorophyll A apoprotein A2 [Medicago truncatula]
PsaD	F01_transcript/19621	1672	2240	1900	716	648	830	482.12	551.29	536.3	228.56	204.2	233.91	1.76919e-22	-1.54388	down	--	--	Cellular Component: chloroplast thylakoid membrane (GO:0009535);; Cellular Component: photosystem I reaction center (GO:0009538);; Biological Process: photosynthesis (GO:0015979);;	K02692|1.23455e-80|mtr:MTR_5g006130|K02692 photosystem I subunit II | (RefSeq) photosystem I reaction center subunit II	ko00195:Photosynthesis	--	--	PsaD	Photosystem I reaction center subunit II, chloroplastic (Precursor) GN=psaD OS=Cucumis sativus (Cucumber) PE=1 SV=1	C	Energy production and conversion	Photosystem I reaction center subunit II [Medicago truncatula]
PsaF	F01_transcript/15536	1660	1782	1352	3482	3774	4099	143.83	141.13	120.98	352.15	373.25	381.67	1.401e-44	1.10758	up	--	--	Cellular Component: plastid (GO:0009536);; Cellular Component: photosystem I reaction center (GO:0009538);; Biological Process: photosynthesis (GO:0015979);; Cellular Component: integral component of membrane (GO:0016021);;	K02694|2.05773e-94|cam:101506661|K02694 photosystem I subunit III | (RefSeq) photosystem I reaction center subunit III, chloroplastic	ko00195:Photosynthesis	--	--	Photosystem I reaction centre subunit III	Photosystem I reaction center subunit III, chloroplastic (Precursor) GN=PSAF OS=Flaveria trinervia (Clustered yellowtops) PE=2 SV=1	S	Function unknown	unknown [Medicago truncatula]
	F01_transcript/16432	3180	3359	3521	7536	7701	7590	336.58	322.58	382.75	925.76	926.11	854.71	2.70223e-69	1.0404	up	--	--	Cellular Component: plastid (GO:0009536);; Cellular Component: photosystem I reaction center (GO:0009538);; Biological Process: photosynthesis (GO:0015979);; Cellular Component: integral component of membrane (GO:0016021);;	K02694|5.22106e-127|cam:101506661|K02694 photosystem I subunit III | (RefSeq) photosystem I reaction center subunit III, chloroplastic	ko00195:Photosynthesis	--	--	Photosystem I reaction centre subunit III	Photosystem I reaction center subunit III, chloroplastic (Precursor) GN=PSAF OS=Arabidopsis thaliana (Mouse-ear cress) PE=1 SV=1	S	Function unknown	unknown [Medicago truncatula]
	F01_transcript/15408	18842	20717	19611	7818	7953	8479	1611.43	1620.04	1733.11	780.92	776.89	779.91	5.02927e-149	-1.4272	down	--	--	Cellular Component: plastid (GO:0009536);; Cellular Component: photosystem I reaction center (GO:0009538);; Biological Process: photosynthesis (GO:0015979);; Cellular Component: integral component of membrane (GO:0016021);;	K02694|2.18088e-126|cam:101506661|K02694 photosystem I subunit III | (RefSeq) photosystem I reaction center subunit III, chloroplastic	ko00195:Photosynthesis	--	--	Photosystem I reaction centre subunit III	Photosystem I reaction center subunit III, chloroplastic (Precursor) GN=PSAF OS=Arabidopsis thaliana (Mouse-ear cress) PE=1 SV=1	S	Function unknown	unknown [Medicago truncatula]
	F01_transcript/15487	20016	21534	21387	10078	10604	10877	1726.32	1697.73	1905.67	1014.93	1044.31	1008.59	6.369e-57	-1.13722	down	--	--	Cellular Component: plastid (GO:0009536);; Cellular Component: photosystem I reaction center (GO:0009538);; Biological Process: photosynthesis (GO:0015979);; Cellular Component: integral component of membrane (GO:0016021);;	K02694|9.91521e-126|cam:101506661|K02694 photosystem I subunit III | (RefSeq) photosystem I reaction center subunit III, chloroplastic	ko00195:Photosynthesis	--	--	Photosystem I reaction centre subunit III	Photosystem I reaction center subunit III, chloroplastic (Precursor) GN=PSAF OS=Arabidopsis thaliana (Mouse-ear cress) PE=1 SV=1	S	Function unknown	unknown [Medicago truncatula]
	F01_transcript/16057	6910	8444	9513	446	551	370	655.24	729.59	929.49	49.32	59.56	37.61	2.49107e-36	-4.32539	down	--	--	Cellular Component: plastid (GO:0009536);; Cellular Component: photosystem I reaction center (GO:0009538);; Biological Process: photosynthesis (GO:0015979);; Cellular Component: integral component of membrane (GO:0016021);;	K02694|5.71879e-95|cam:101506661|K02694 photosystem I subunit III | (RefSeq) photosystem I reaction center subunit III, chloroplastic	ko00195:Photosynthesis	--	--	Photosystem I reaction centre subunit III	Photosystem I reaction center subunit III, chloroplastic (Precursor) GN=PSAF OS=Flaveria trinervia (Clustered yellowtops) PE=2 SV=1	S	Function unknown	unknown [Medicago truncatula]
	F01_transcript/16550	2148	2376	2872	692	704	822	236.77	237.29	324.82	88.49	88.16	96.3	1.09228e-12	-1.88531	down	--	--	Cellular Component: plastid (GO:0009536);; Cellular Component: photosystem I reaction center (GO:0009538);; Biological Process: photosynthesis (GO:0015979);; Cellular Component: integral component of membrane (GO:0016021);;	K02694|4.78987e-128|cam:101506661|K02694 photosystem I subunit III | (RefSeq) photosystem I reaction center subunit III, chloroplastic	ko00195:Photosynthesis	--	--	Photosystem I reaction centre subunit III	Photosystem I reaction center subunit III, chloroplastic (Precursor) GN=PSAF OS=Arabidopsis thaliana (Mouse-ear cress) PE=1 SV=1	S	Function unknown	unknown [Medicago truncatula]
beta	F01_transcript/5015	13	8	29	141	114	139	0.37	0.22	0.85	4.62	3.67	4.26	1.59311e-20	2.80736	up	[C]	Energy production and conversion	Molecular Function: ATP binding (GO:0005524);; Cellular Component: plasma membrane (GO:0005886);; Cellular Component: chloroplast thylakoid membrane (GO:0009535);; Biological Process: ATP synthesis coupled proton transport (GO:0015986);; Biological Process: ATP hydrolysis coupled proton transport (GO:0015991);; Cellular Component: integral component of membrane (GO:0016021);; Cellular Component: …	K02112|0|mtr:MetrCp073|K02112 F-type H+-transporting ATPase subunit beta [EC:3.6.3.14] | (RefSeq) atpB; ATP synthase CF1 beta subunit	ko00190:Oxidative phosphorylation;ko00195:Photosynthesis	[C]	Energy production and conversion	ATP synthase alpha/beta family, nucleotide-binding domain;; ATP synthase alpha/beta family, beta-barrel domain;; ATPase family associated with various cellular activities (AAA);; ATP synthase, Delta/Epsilon chain, beta-sandwich domain;; ATP synthase, Delta/Epsilon chain, long alpha-helix domain	ATP synthase subunit beta, chloroplastic {ECO:0000255|HAMAP-Rule:MF_01347} OS=Medicago sativa (Alfalfa) PE=3 SV=1	C	Energy production and conversion	RecName: Full=ATP synthase subunit beta, chloroplastic; AltName: Full=ATP synthase F1 sector subunit beta; AltName: Full=F-ATPase subunit beta (chloroplast) [Medicago sativa]
	F01_transcript/8045	80	106	74	201	187	228	2.64	3.27	2.57	7.86	7.11	8.32	9.90105e-09	1.11103	up	[C]	Energy production and conversion	Molecular Function: ATP binding (GO:0005524);; Cellular Component: plasma membrane (GO:0005886);; Cellular Component: chloroplast thylakoid membrane (GO:0009535);; Biological Process: ATP synthesis coupled proton transport (GO:0015986);; Biological Process: ATP hydrolysis coupled proton transport (GO:0015991);; Cellular Component: integral component of membrane (GO:0016021);; Cellular Component: …	K02112|0|mtr:MetrCp073|K02112 F-type H+-transporting ATPase subunit beta [EC:3.6.3.14] | (RefSeq) atpB; ATP synthase CF1 beta subunit	ko00190:Oxidative phosphorylation;ko00195:Photosynthesis	[C]	Energy production and conversion	ATP synthase alpha/beta family, nucleotide-binding domain;; ATP synthase alpha/beta family, beta-barrel domain;; ATPase family associated with various cellular activities (AAA);; ATP synthase, Delta/Epsilon chain, beta-sandwich domain;; ATP synthase, Delta/Epsilon chain, long alpha-helix domain	ATP synthase subunit beta, chloroplastic {ECO:0000255|HAMAP-Rule:MF_01347} OS=Medicago sativa (Alfalfa) PE=3 SV=1	C	Energy production and conversion	RecName: Full=ATP synthase subunit beta, chloroplastic; AltName: Full=ATP synthase F1 sector subunit beta; AltName: Full=F-ATPase subunit beta (chloroplast) [Medicago sativa]
alpha	F01_transcript/1971	76	72	79	269	232	240	1.55	1.38	1.7	6.54	5.5	5.45	3.71886e-17	1.56537	up	[C]	Energy production and conversion	Molecular Function: ATP binding (GO:0005524);; Cellular Component: plasma membrane (GO:0005886);; Cellular Component: chloroplast thylakoid membrane (GO:0009535);; Biological Process: ATP synthesis coupled proton transport (GO:0015986);; Biological Process: ATP hydrolysis coupled proton transport (GO:0015991);; Cellular Component: proton-transporting ATP synthase complex, catalytic core F(1) (GO:…	K02111|0|cam:6797510|K02111 F-type H+-transporting ATPase subunit alpha [EC:3.6.3.14] | (RefSeq) atpA, CiarC_p026; ATP synthase CF1 alpha subunit	ko00190:Oxidative phosphorylation;ko00195:Photosynthesis	[C]	Energy production and conversion	ATP synthase alpha/beta family, nucleotide-binding domain;; ATP synthase alpha/beta chain, C terminal domain;; ATP synthase alpha/beta family, beta-barrel domain	ATP synthase subunit alpha, chloroplastic {ECO:0000255|HAMAP-Rule:MF_01346} OS=Lotus japonicus (Lotus corniculatus var. japonicus) PE=3 SV=1	C	Energy production and conversion	ATP synthase CF1 alpha subunit (chloroplast) [Medicago truncatula f. tricycla]
	F01_transcript/240	81	186	77	289	254	315	1.13	2.43	1.13	4.79	4.11	4.9	2.85334e-05	1.20093	up	[C]	Energy production and conversion	Molecular Function: ATP binding (GO:0005524);; Cellular Component: plasma membrane (GO:0005886);; Cellular Component: chloroplast thylakoid membrane (GO:0009535);; Biological Process: ATP synthesis coupled proton transport (GO:0015986);; Biological Process: ATP hydrolysis coupled proton transport (GO:0015991);; Cellular Component: proton-transporting ATP synthase complex, catalytic core F(1) (GO:…	K02111|0|cam:6797510|K02111 F-type H+-transporting ATPase subunit alpha [EC:3.6.3.14] | (RefSeq) atpA, CiarC_p026; ATP synthase CF1 alpha subunit	ko00190:Oxidative phosphorylation;ko00195:Photosynthesis	[C]	Energy production and conversion	ATP synthase alpha/beta family, nucleotide-binding domain;; ATP synthase alpha/beta chain, C terminal domain;; ATP synthase alpha/beta family, beta-barrel domain;; ATP synthase subunit C	ATP synthase subunit alpha, chloroplastic {ECO:0000255|HAMAP-Rule:MF_01346} OS=Lotus japonicus (Lotus corniculatus var. japonicus) PE=3 SV=1	C	Energy production and conversion	ATP synthase CF1 alpha subunit (chloroplast) [Medicago truncatula f. tricycla]
gamma	F01_transcript/12175	3184	3203	2856	9223	9715	9900	152.16	141.95	142.62	520.68	535.31	519.16	1.65645e-156	1.50261	up	[C]	Energy production and conversion	Cellular Component: chloroplast thylakoid membrane (GO:0009535);; Biological Process: ATP synthesis coupled proton transport (GO:0015986);; Cellular Component: proton-transporting ATP synthase complex, catalytic core F(1) (GO:0045261);; Molecular Function: proton-transporting ATP synthase activity, rotational mechanism (GO:0046933);; Molecular Function: proton-transporting ATPase activity, rotati…	K02115|0|gmx:100797290|K02115 F-type H+-transporting ATPase subunit gamma | (RefSeq) ATP synthase gamma chain, chloroplastic	ko00190:Oxidative phosphorylation;ko00195:Photosynthesis	[C]	Energy production and conversion	ATP synthase	ATP synthase gamma chain, chloroplastic (Precursor) GN=ATPC OS=Pisum sativum (Garden pea) PE=2 SV=1	C	Energy production and conversion	unknown [Medicago truncatula]
	F01_transcript/11799	20725	22115	19686	8735	9237	9095	970.47	960.91	963.62	483.41	498.93	467.64	1.85409e-133	-1.34615	down	[C]	Energy production and conversion	Cellular Component: chloroplast thylakoid membrane (GO:0009535);; Biological Process: ATP synthesis coupled proton transport (GO:0015986);; Cellular Component: proton-transporting ATP synthase complex, catalytic core F(1) (GO:0045261);; Molecular Function: proton-transporting ATP synthase activity, rotational mechanism (GO:0046933);; Molecular Function: proton-transporting ATPase activity, rotati…	K02115|0|gmx:100797290|K02115 F-type H+-transporting ATPase subunit gamma | (RefSeq) ATP synthase gamma chain, chloroplastic	ko00190:Oxidative phosphorylation;ko00195:Photosynthesis	[C]	Energy production and conversion	ATP synthase	ATP synthase gamma chain, chloroplastic (Precursor) GN=ATPC OS=Pisum sativum (Garden pea) PE=2 SV=1	C	Energy production and conversion	unknown [Medicago truncatula]
	F01_transcript/16305	1809	2006	1738	650	596	779	185.09	186.43	182.81	77.26	69.39	85	1.25641e-111	-1.59541	down	[C]	Energy production and conversion	Cellular Component: chloroplast thylakoid membrane (GO:0009535);; Biological Process: photosynthetic electron transport in photosystem II (GO:0009772);; Cellular Component: chloroplast envelope (GO:0009941);; Biological Process: ATP synthesis coupled proton transport (GO:0015986);; Cellular Component: proton-transporting ATP synthase complex, catalytic core F(1) (GO:0045261);; Molecular Function:…	K02115|6.06814e-139|vvi:100264091|K02115 F-type H+-transporting ATPase subunit gamma | (RefSeq) ATP synthase gamma chain, chloroplastic	ko00190:Oxidative phosphorylation;ko00195:Photosynthesis	[C]	Energy production and conversion	ATP synthase	ATP synthase gamma chain, chloroplastic (Precursor) GN=ATPC OS=Nicotiana tabacum (Common tobacco) PE=1 SV=1	C	Energy production and conversion	unknown [Medicago truncatula]
PsaK	F01_transcript/19199	1148	1399	1008	558	468	583	268.98	284.28	234.09	146.5	120.99	136.54	1.12883e-17	-1.27709	down	--	--	Cellular Component: photosystem I (GO:0009522);; Cellular Component: chloroplast thylakoid membrane (GO:0009535);; Biological Process: photosynthesis (GO:0015979);; Cellular Component: integral component of membrane (GO:0016021);; Molecular Function: chlorophyll binding (GO:0016168);;	K02698|2.62177e-69|cam:101506632|K02698 photosystem I subunit X | (RefSeq) photosystem I reaction center subunit psaK, chloroplastic	ko00195:Photosynthesis	--	--	Photosystem I psaG / psaK	Photosystem I reaction center subunit psaK, chloroplastic (Precursor) GN=PSAK OS=Medicago sativa (Alfalfa) PE=2 SV=1	S	Function unknown	unknown [Medicago truncatula]
PsaN	F01_transcript/17947	922	1153	896	6797	6475	6847	140.73	157	138.7	1187.62	1109.99	1085.59	0	2.62535	up	--	--	Cellular Component: photosystem I (GO:0009522);; Biological Process: photosynthesis (GO:0015979);;	K02701|4.45848e-101|mtr:MTR_3g095540|K02701 photosystem I subunit PsaN | (RefSeq) photosystem I reaction center subunit N	ko00195:Photosynthesis	--	--	Photosystem I reaction centre subunit N (PSAN or PSI-N)	Photosystem I reaction center subunit N, chloroplastic (Precursor) GN=PSAN OS=Arabidopsis thaliana (Mouse-ear cress) PE=1 SV=2	S	Function unknown	Photosystem I reaction center subunit N [Medicago truncatula]
	F01_transcript/17164	11388	12686	10505	5729	6021	6366	1460.98	1464.43	1375.04	847.42	872.66	858.93	1.89653e-85	-1.07006	down	--	--	Cellular Component: photosystem I (GO:0009522);; Biological Process: photosynthesis (GO:0015979);;	K02701|1.16724e-100|mtr:MTR_3g095540|K02701 photosystem I subunit PsaN | (RefSeq) photosystem I reaction center subunit N	ko00195:Photosynthesis	--	--	Photosystem I reaction centre subunit N (PSAN or PSI-N)	Photosystem I reaction center subunit N, chloroplastic (Precursor) GN=PSAN OS=Arabidopsis thaliana (Mouse-ear cress) PE=1 SV=2	S	Function unknown	Photosystem I reaction center subunit N [Medicago truncatula]
	F01_transcript/17486	18595	20581	16760	8138	8215	8539	2473.72	2459.43	2271.9	1246.47	1233.25	1191.86	1.64883e-97	-1.30437	down	--	--	Cellular Component: photosystem I (GO:0009522);; Biological Process: photosynthesis (GO:0015979);;	K02701|2.48592e-100|mtr:MTR_3g095540|K02701 photosystem I subunit PsaN | (RefSeq) photosystem I reaction center subunit N	ko00195:Photosynthesis	--	--	Photosystem I reaction centre subunit N (PSAN or PSI-N)	Photosystem I reaction center subunit N, chloroplastic (Precursor) GN=PSAN OS=Arabidopsis thaliana (Mouse-ear cress) PE=1 SV=2	S	Function unknown	Photosystem I reaction center subunit N [Medicago truncatula]
PsaO	F01_transcript/18132	781	953	719	2257	2130	2341	115.59	125.92	107.86	382.54	354.2	360.36	1.29769e-79	1.32155	up	--	--	Cellular Component: integral component of membrane (GO:0016021);;	K14332|4.88722e-83|cam:101500027|K14332 photosystem I subunit PsaO | (RefSeq) photosystem I subunit O	ko00195:Photosynthesis	--	--	--	Photosystem I subunit O (Precursor) GN=PSAO OS=Arabidopsis thaliana (Mouse-ear cress) PE=1 SV=1	S	Function unknown	unknown [Medicago truncatula]
	F01_transcript/21357	5	1	3	99	85	100	7.68	1.18	4.16	161.51	143.63	131.97	1.06924e-25	4.82022	up	--	--	--	K14332|6.59774e-07|bdi:100840579|K14332 photosystem I subunit PsaO | (RefSeq) photosystem I subunit O	ko00195:Photosynthesis	--	--	--	Photosystem I subunit O (Precursor) GN=PSAO OS=Arabidopsis thaliana (Mouse-ear cress) PE=1 SV=1	S	Function unknown	unknown [Medicago truncatula]
	F01_transcript/18286	10249	10987	9082	796	775	832	1655.42	1577.41	1482.47	146.91	140.37	138.99	0	-3.79402	down	--	--	Cellular Component: integral component of membrane (GO:0016021);;	K14332|7.45777e-84|cam:101500027|K14332 photosystem I subunit PsaO | (RefSeq) photosystem I subunit O	ko00195:Photosynthesis	--	--	--	Photosystem I subunit O (Precursor) GN=PSAO OS=Arabidopsis thaliana (Mouse-ear cress) PE=1 SV=1	S	Function unknown	unknown [Medicago truncatula]
	F01_transcript/19747	50	53	33	4	4	1	14.1	12.93	9.39	1.34	1.31	0.3	2.35903e-13	-4.03231	down	--	--	Cellular Component: integral component of membrane (GO:0016021);;	K14332|2.49667e-53|cam:101500027|K14332 photosystem I subunit PsaO | (RefSeq) photosystem I subunit O	ko00195:Photosynthesis	--	--	--	Photosystem I subunit O (Precursor) GN=PSAO OS=Arabidopsis thaliana (Mouse-ear cress) PE=1 SV=1	S	Function unknown	unknown [Medicago truncatula]
	F01_transcript/20853	184	248	203	14	18	28	148.27	158.38	150.6	12.72	16.22	20.1	1.82858e-47	-3.54905	down	--	--	Cellular Component: plastid (GO:0009536);; Cellular Component: integral component of membrane (GO:0016021);;	K14332|1.11484e-13|bdi:100840579|K14332 photosystem I subunit PsaO | (RefSeq) photosystem I subunit O	ko00195:Photosynthesis	--	--	--	Photosystem I subunit O (Precursor) GN=PSAO OS=Arabidopsis thaliana (Mouse-ear cress) PE=1 SV=1	S	Function unknown	unknown [Medicago truncatula]
C_CK_vs_A_CK (A1)
Component		T13_Count	T14_Count	T15_Count	T10_Count	T11_Count	T12_Count	T13_FPKM	T14_FPKM	T15_FPKM	T10_FPKM	T11_FPKM	T12_FPKM	FDR	log2FC	regulated	COG_class	COG_class_annotation	GO_annotation	KEGG_annotation	KEGG_pathway	KOG_class	KOG_class_annotation	Pfam_annotation	Swissprot_annotation	eggNOG_class	eggNOG_class_annotation	nr_annotation
PsbB	F01_transcript/186	235	262	217	4	17	11	3.29	4.07	3.25	0.07	0.21	0.16	6.30078e-56	-4.88281	down	[C]	Energy production and conversion	Cellular Component: photosystem II (GO:0009523);; Cellular Component: chloroplast thylakoid membrane (GO:0009535);; Biological Process: photosynthetic electron transport in photosystem II (GO:0009772);; Cellular Component: integral component of membrane (GO:0016021);; Molecular Function: chlorophyll binding (GO:0016168);; Biological Process: protein-chromophore linkage (GO:0018298);; Molecular Fu…	K02704|0|mtr:MTR_4g051370|K02704 photosystem II CP47 chlorophyll apoprotein | (RefSeq) photosystem II CP47 chlorophyll A apoprotein	ko00195:Photosynthesis	--	--	Photosystem II protein;; Cytochrome b/b6/petB;; Cytochrome b(N-terminal)/b6/petB;; Cytochrome b(C-terminal)/b6/petD;; Photosystem II 10 kDa phosphoprotein	Photosystem II CP47 reaction center protein {ECO:0000255|HAMAP-Rule:MF_01495} OS=Cicer arietinum (Chickpea) PE=3 SV=1	S	Function unknown	Photosystem II CP47 chlorophyll apoprotein [Medicago truncatula]
PetB	F01_transcript/12457	24	30	18	90	120	96	1.28	1.79	1.01	4.54	5.53	4.92	7.12254e-09	1.69689	up	[C]	Energy production and conversion	Molecular Function: iron ion binding (GO:0005506);; Cellular Component: cytochrome b6f complex (GO:0009512);; Cellular Component: chloroplast thylakoid membrane (GO:0009535);; Cellular Component: integral component of membrane (GO:0016021);; Molecular Function: oxidoreductase activity (GO:0016491);; Biological Process: photosynthesis, light reaction (GO:0019684);; Molecular Function: heme binding…	K02635|4.45022e-109|cam:6797553|K02635 cytochrome b6 | (RefSeq) petB, CiarC_p049; cytochrome b6	ko00195:Photosynthesis	[C]	Energy production and conversion	Cytochrome b(C-terminal)/b6/petD;; Cytochrome b/b6/petB;; Domain of unknown function (DUF4405)	Cytochrome b6 {ECO:0000255|HAMAP-Rule:MF_00633} OS=Oenothera elata subsp. hookeri (Hooker&apos;s evening primrose) PE=3 SV=2	C	Energy production and conversion	unknown [Medicago truncatula]
PetC	F01_transcript/21686	130	109	138	94	64	75	255.28	222.74	238.12	179.39	132.57	143.79	4.15776e-07	-1.05788	down	[C]	Energy production and conversion	Molecular Function: plastoquinol--plastocyanin reductase activity (GO:0009496);; Cellular Component: chloroplast thylakoid membrane (GO:0009535);; Biological Process: photosynthesis (GO:0015979);; Cellular Component: integral component of membrane (GO:0016021);; Molecular Function: electron transporter, transferring electrons within cytochrome b6/f complex of photosystem II activity (GO:0045158);…	K02636|5.30929e-27|mtr:MTR_2g089510|K02636 cytochrome b6-f complex iron-sulfur subunit [EC:1.10.9.1] | (RefSeq) cytochrome b6-F complex iron-sulfur subunit	ko00195:Photosynthesis	[C]	Energy production and conversion	--	Cytochrome b6-f complex iron-sulfur subunit, chloroplastic (Precursor) GN=petC OS=Pisum sativum (Garden pea) PE=2 SV=1	C	Energy production and conversion	Cytochrome b6-f complex iron-sulfur subunit [Medicago truncatula]
PsbO	F01_transcript/14445	1277	1004	1119	4485	4939	4628	103.9	90.72	96.44	348.21	352.62	365.95	1.16936e-216	1.67629	up	--	--	Molecular Function: calcium ion binding (GO:0005509);; Cellular Component: chloroplast thylakoid membrane (GO:0009535);; Cellular Component: photosystem II oxygen evolving complex (GO:0009654);; Cellular Component: integral component of membrane (GO:0016021);; Cellular Component: extrinsic component of membrane (GO:0019898);; Biological Process: photosystem II stabilization (GO:0042549);;	K02716|0|mtr:MTR_5g018670|K02716 photosystem II oxygen-evolving enhancer protein 1 | (RefSeq) photosystem II oxygen-evolving enhancer protein	ko00195:Photosynthesis	--	--	Manganese-stabilising protein / photosystem II polypeptide	Oxygen-evolving enhancer protein 1, chloroplastic (Precursor) GN=PSBO OS=Pisum sativum (Garden pea) PE=2 SV=1	G	Carbohydrate transport and metabolism	Oxygen evolving enhancer protein [Medicago truncatula]
	F01_transcript/13494	8087	7257	7305	4311	4920	4385	498.22	496.52	478.49	253.63	265.61	262.37	3.14537e-132	-1.1103	down	--	--	Molecular Function: calcium ion binding (GO:0005509);; Cellular Component: chloroplast thylakoid membrane (GO:0009535);; Cellular Component: photosystem II oxygen evolving complex (GO:0009654);; Cellular Component: integral component of membrane (GO:0016021);; Cellular Component: extrinsic component of membrane (GO:0019898);; Biological Process: photosystem II stabilization (GO:0042549);;	K02716|0|mtr:MTR_5g018670|K02716 photosystem II oxygen-evolving enhancer protein 1 | (RefSeq) photosystem II oxygen-evolving enhancer protein	ko00195:Photosynthesis	--	--	Manganese-stabilising protein / photosystem II polypeptide	Oxygen-evolving enhancer protein 1, chloroplastic (Precursor) GN=PSBO OS=Pisum sativum (Garden pea) PE=2 SV=1	G	Carbohydrate transport and metabolism	Oxygen evolving enhancer protein [Medicago truncatula]
PsbP	F01_transcript/15420	1086	933	957	8793	9314	9187	93.83	89.54	87.56	725.24	706.78	772.16	1.29157e-221	2.82543	up	--	--	Molecular Function: calcium ion binding (GO:0005509);; Cellular Component: chloroplast thylakoid membrane (GO:0009535);; Cellular Component: photosystem II oxygen evolving complex (GO:0009654);; Biological Process: photosynthesis (GO:0015979);; Cellular Component: extrinsic component of membrane (GO:0019898);;	K02717|1.90406e-150|cam:101514916|K02717 photosystem II oxygen-evolving enhancer protein 2 | (RefSeq) oxygen-evolving enhancer protein 2, chloroplastic	ko00195:Photosynthesis	--	--	PsbP	Oxygen-evolving enhancer protein 2, chloroplastic (Precursor) GN=PSBP OS=Pisum sativum (Garden pea) PE=1 SV=1	S	Function unknown	unknown [Medicago truncatula]
	F01_transcript/16393	341	295	337	2407	2692	2428	35.7	34.27	37.25	239.85	247.37	247	1.53805e-304	2.5768	up	--	--	Molecular Function: calcium ion binding (GO:0005509);; Cellular Component: chloroplast (GO:0009507);; Cellular Component: photosystem II oxygen evolving complex (GO:0009654);; Biological Process: photosynthesis (GO:0015979);; Cellular Component: extrinsic component of membrane (GO:0019898);; Cellular Component: thylakoid lumen (GO:0031977);;	K02717|3.1502e-140|cam:101510219|K02717 photosystem II oxygen-evolving enhancer protein 2 | (RefSeq) psbP-like protein 1, chloroplastic	ko00195:Photosynthesis	--	--	PsbP	PsbP-like protein 1, chloroplastic (Precursor) GN=PPL1 OS=Arabidopsis thaliana (Mouse-ear cress) PE=1 SV=1	G	Carbohydrate transport and metabolism	oxygen-evolving complex/thylakoid lumenal 25.6 kDa protein [Medicago truncatula]
	F01_transcript/21099	807	734	853	369	304	352	735.29	718.62	731.95	321.23	266.04	315.96	3.36234e-52	-1.59135	down	--	--	Molecular Function: calcium ion binding (GO:0005509);; Cellular Component: chloroplast thylakoid membrane (GO:0009535);; Cellular Component: photosystem II oxygen evolving complex (GO:0009654);; Biological Process: photosynthesis (GO:0015979);; Cellular Component: extrinsic component of membrane (GO:0019898);;	K02717|2.83282e-44|cam:101514916|K02717 photosystem II oxygen-evolving enhancer protein 2 | (RefSeq) oxygen-evolving enhancer protein 2, chloroplastic	ko00195:Photosynthesis	--	--	--	Oxygen-evolving enhancer protein 2, chloroplastic (Precursor) GN=PSBP OS=Pisum sativum (Garden pea) PE=1 SV=1	S	Function unknown	oxygen-evolving enhancer protein 2-1 [Medicago truncatula]
PsbQ	F01_transcript/8383	594	541	568	160	160	172	20.98	21.21	21.39	5.4	4.96	5.91	6.12535e-94	-2.16216	down	--	--	Molecular Function: calcium ion binding (GO:0005509);; Cellular Component: photosystem II oxygen evolving complex (GO:0009654);; Biological Process: photosynthesis (GO:0015979);; Cellular Component: extrinsic component of membrane (GO:0019898);;	K08901|1.21548e-44|cam:101495316|K08901 photosystem II oxygen-evolving enhancer protein 3 | (RefSeq) oxygen-evolving enhancer protein 3, chloroplastic-like	ko00195:Photosynthesis	--	--	Oxygen evolving enhancer protein 3 (PsbQ)	Oxygen-evolving enhancer protein 3-2, chloroplastic (Precursor) GN=C17L7.100 OS=Arabidopsis thaliana (Mouse-ear cress) PE=1 SV=2	S	Function unknown	oxygen-evolving enhancer protein [Medicago truncatula]
PsbR	F01_transcript/18244	27	30	27	467	442	474	5.37	6.55	5.48	86.62	76.41	90.41	3.04801e-82	3.6652	up	--	--	Cellular Component: photosystem II oxygen evolving complex (GO:0009654);; Biological Process: photosynthesis (GO:0015979);; Cellular Component: integral component of membrane (GO:0016021);;	K03541|1.65183e-70|mtr:MTR_2g064650|K03541 photosystem II 10kDa protein | (RefSeq) photosystem II 10 kDa proteinPsbR protein	ko00195:Photosynthesis	--	--	Photosystem II 10 kDa polypeptide PsbR	Photosystem II 10 kDa polypeptide, chloroplastic (Precursor) GN=PSBR OS=Solanum tuberosum (Potato) PE=2 SV=1	S	Function unknown	Photosystem II 10 kDa polypeptide [Medicago truncatula]
	F01_transcript/18451	179	143	145	409	474	359	31.78	28.23	26.86	68.99	74.22	62.25	1.5624e-16	1.03436	up	--	--	Cellular Component: photosystem II oxygen evolving complex (GO:0009654);; Biological Process: photosynthesis (GO:0015979);; Cellular Component: integral component of membrane (GO:0016021);;	K03541|2.76756e-70|mtr:MTR_2g064650|K03541 photosystem II 10kDa protein | (RefSeq) photosystem II 10 kDa proteinPsbR protein	ko00195:Photosynthesis	--	--	Photosystem II 10 kDa polypeptide PsbR	Photosystem II 10 kDa polypeptide, chloroplastic (Precursor) GN=PSBR OS=Solanum tuberosum (Potato) PE=2 SV=1	S	Function unknown	Photosystem II 10 kDa polypeptide [Medicago truncatula]
PsbS	F01_transcript/20947	1	5	7	19	26	20	0.8	4.32	5.35	14.53	19.72	15.88	0.000459657	1.91141	up	--	--	Cellular Component: photosystem II (GO:0009523);; Cellular Component: chloroplast thylakoid membrane (GO:0009535);; Biological Process: photosynthesis (GO:0015979);; Cellular Component: integral component of membrane (GO:0016021);;	K03542|7.20718e-26|mtr:MTR_3g088040|K03542 photosystem II 22kDa protein | (RefSeq) light-harvesting complex I chlorophyll A/B-binding protein	ko00195:Photosynthesis	--	--	--	Photosystem II 22 kDa protein, chloroplastic (Precursor) GN=PSBS OS=Spinacia oleracea (Spinach) PE=1 SV=1	I	Lipid transport and metabolism	Photosystem II 22 kDa protein [Medicago truncatula]
PsbW	F01_transcript/20233	583	555	667	2199	2158	2252	231.96	243.47	267.69	831.81	778.28	884.22	1.09118e-38	1.49974	up	--	--	Cellular Component: chloroplast (GO:0009507);; Cellular Component: photosystem II (GO:0009523);; Biological Process: photosynthesis (GO:0015979);; Cellular Component: integral component of membrane (GO:0016021);;	K02721|8.1388e-35|cam:101513777|K02721 photosystem II PsbW protein | (RefSeq) photosystem II reaction center W protein, chloroplastic-like	ko00195:Photosynthesis	--	--	Photosystem II reaction centre W protein (PsbW)	Photosystem II reaction center W protein, chloroplastic (Precursor) GN=psbW OS=Spinacia oleracea (Spinach) PE=1 SV=1	S	Function unknown	photosystem II reaction center W [Medicago truncatula]
	F01_transcript/18209	6072	5400	5162	1716	1745	1651	980.59	967.57	872.44	264.13	249.19	260.69	5.52218e-136	-2.07546	down	--	--	Cellular Component: chloroplast (GO:0009507);; Cellular Component: photosystem II (GO:0009523);; Biological Process: photosynthesis (GO:0015979);; Cellular Component: integral component of membrane (GO:0016021);;	K02721|7.24085e-30|cam:101513777|K02721 photosystem II PsbW protein | (RefSeq) photosystem II reaction center W protein, chloroplastic-like	ko00195:Photosynthesis	--	--	Photosystem II reaction centre W protein (PsbW);; Photosystem II reaction centre W protein (PsbW)	Photosystem II reaction center W protein, chloroplastic (Precursor) GN=psbW OS=Spinacia oleracea (Spinach) PE=1 SV=1	S	Function unknown	photosystem II reaction center W [Medicago truncatula]
	F01_transcript/19414	1153	1060	1020	1	0	0	274.8	280	251.34	0.23	0	0	0	-12.005	down	--	--	Cellular Component: photosystem II (GO:0009523);; Biological Process: photosynthesis (GO:0015979);; Cellular Component: integral component of membrane (GO:0016021);; Molecular Function: manganese ion binding (GO:0030145);;	K02723|8.02518e-79|mtr:MTR_3g086230|K02723 photosystem II PsbY protein | (RefSeq) photosystem II core complex family psbY protein	ko00195:Photosynthesis	--	--	Photosystem II protein Y (PsbY)	Photosystem II protein psbY-2, chloroplastic (Precursor) GN=PSBY OS=Spinacia oleracea (Spinach) PE=1 SV=2	I	Lipid transport and metabolism	unknown [Medicago truncatula]
PetE	F01_transcript/17953	2834	2598	2814	25246	27444	25463	484.76	493.06	503.04	4114.42	4154.25	4260.19	0	2.86916	up	[C]	Energy production and conversion	Molecular Function: copper ion binding (GO:0005507);; Molecular Function: electron carrier activity (GO:0009055);; Cellular Component: chloroplast thylakoid membrane (GO:0009535);; Cellular Component: integral component of membrane (GO:0016021);; Biological Process: oxidation-reduction process (GO:0055114);;	K02638|4.9974e-94|mtr:MTR_3g114850|K02638 plastocyanin | (RefSeq) plastocyanin	ko00195:Photosynthesis	--	--	Copper binding proteins, plastocyanin/azurin family	Plastocyanin, chloroplastic (Precursor) GN=PETE OS=Pisum sativum (Garden pea) PE=4 SV=1	C	Energy production and conversion	Plastocyanin [Medicago truncatula]
PetF	F01_transcript/17401	344	215	203	3512	4049	3718	49.41	34.28	30.65	479.8	512.16	520.2	0	3.52346	up	[C]	Energy production and conversion	Molecular Function: protein binding (GO:0005515);; Molecular Function: electron carrier activity (GO:0009055);; Cellular Component: chloroplast (GO:0009507);; Biological Process: electron transport chain (GO:0022900);; Molecular Function: metal ion binding (GO:0046872);; Molecular Function: 2 iron, 2 sulfur cluster binding (GO:0051537);;	K02639|1.73835e-82|mtr:MTR_2g006290|K02639 ferredoxin | (RefSeq) 2Fe-2S ferredoxin superfamily protein	ko00195:Photosynthesis	--	--	2Fe-2S iron-sulfur cluster binding domain	Ferredoxin-1, chloroplastic (Precursor) GN=PETF OS=Pisum sativum (Garden pea) PE=1 SV=2	C	Energy production and conversion	Ferredoxin I [Medicago truncatula]
	F01_transcript/18712	4	9	18	69	92	99	0.75	1.96	3.55	12.42	15.26	18.12	1.41433e-12	2.67905	up	[C]	Energy production and conversion	Molecular Function: protein binding (GO:0005515);; Molecular Function: electron carrier activity (GO:0009055);; Cellular Component: chloroplast (GO:0009507);; Biological Process: electron transport chain (GO:0022900);; Molecular Function: metal ion binding (GO:0046872);; Molecular Function: 2 iron, 2 sulfur cluster binding (GO:0051537);;	K02639|2.72355e-66|mtr:MTR_2g006290|K02639 ferredoxin | (RefSeq) 2Fe-2S ferredoxin superfamily protein	ko00195:Photosynthesis	--	--	2Fe-2S iron-sulfur cluster binding domain	Ferredoxin-1, chloroplastic (Precursor) GN=PETF OS=Pisum sativum (Garden pea) PE=1 SV=2	C	Energy production and conversion	Ferredoxin I [Medicago truncatula]
	F01_transcript/21206	87	70	76	319	296	291	83.69	72.23	68.86	293.91	276.1	275.78	2.60447e-22	1.59043	up	[C]	Energy production and conversion	Biological Process: ferredoxin metabolic process (GO:0006124);; Molecular Function: ferrous iron binding (GO:0008198);; Molecular Function: electron carrier activity (GO:0009055);; Cellular Component: chloroplast (GO:0009507);; Biological Process: electron transport chain (GO:0022900);; Molecular Function: 2 iron, 2 sulfur cluster binding (GO:0051537);;	K02639|4.04226e-20|mtr:MTR_2g006290|K02639 ferredoxin | (RefSeq) 2Fe-2S ferredoxin superfamily protein	ko00195:Photosynthesis	--	--	--	Ferredoxin OS=Medicago sativa (Alfalfa) PE=1 SV=1	C	Energy production and conversion	RecName: Full=Ferredoxin [Medicago sativa]
PetH	F01_transcript/12300	625	541	658	4811	4792	4341	31.49	30.3	35.32	231.54	211.34	212.22	1.25728e-223	2.56085	up	[P]	Inorganic ion transport and metabolism	Molecular Function: nucleotide binding (GO:0000166);; Molecular Function: ferredoxin-NADP+ reductase activity (GO:0004324);; Molecular Function: protein binding (GO:0005515);; Molecular Function: poly(U) RNA binding (GO:0008266);; Cellular Component: chloroplast thylakoid membrane (GO:0009535);; Cellular Component: chloroplast stroma (GO:0009570);; Biological Process: photosynthetic electron tran…	K02641|0|mtr:MTR_5g022300|K02641 ferredoxin--NADP+ reductase [EC:1.18.1.2] | (RefSeq) leaf ferredoxin-NADP reductase	ko00195:Photosynthesis	[C]	Energy production and conversion	Oxidoreductase NAD-binding domain;; Oxidoreductase FAD-binding domain	Ferredoxin--NADP reductase, leaf isozyme, chloroplastic (Precursor) GN=PETH OS=Pisum sativum (Garden pea) PE=1 SV=1	P	Inorganic ion transport and metabolism	Ferredoxin-NADP reductase [Medicago truncatula]
	F01_transcript/13104	0	13	0	80	44	55	0	0.86	0	4.4	2.25	3.09	1.65817e-06	3.33575	up	[P]	Inorganic ion transport and metabolism	Molecular Function: ferredoxin-NADP+ reductase activity (GO:0004324);; Molecular Function: protein binding (GO:0005515);; Molecular Function: poly(U) RNA binding (GO:0008266);; Cellular Component: chloroplast thylakoid membrane (GO:0009535);; Cellular Component: chloroplast stroma (GO:0009570);; Biological Process: photosynthetic electron transport chain (GO:0009767);; Cellular Component: chlorop…	K02641|0|mtr:MTR_5g022300|K02641 ferredoxin--NADP+ reductase [EC:1.18.1.2] | (RefSeq) leaf ferredoxin-NADP reductase	ko00195:Photosynthesis	[C]	Energy production and conversion	Oxidoreductase NAD-binding domain;; Oxidoreductase FAD-binding domain	Ferredoxin--NADP reductase, chloroplastic (Precursor) GN=PETH OS=Vicia faba (Broad bean) PE=2 SV=1	P	Inorganic ion transport and metabolism	Ferredoxin-NADP reductase [Medicago truncatula]
	F01_transcript/13755	2216	2443	1965	12606	14724	13738	141.51	173.25	133.35	768.47	823.8	851.71	9.84648e-120	2.25101	up	[P]	Inorganic ion transport and metabolism	Molecular Function: ferredoxin-NADP+ reductase activity (GO:0004324);; Molecular Function: protein binding (GO:0005515);; Molecular Function: poly(U) RNA binding (GO:0008266);; Cellular Component: chloroplast thylakoid membrane (GO:0009535);; Cellular Component: chloroplast stroma (GO:0009570);; Biological Process: photosynthetic electron transport chain (GO:0009767);; Cellular Component: chlorop…	K02641|0|mtr:MTR_5g022300|K02641 ferredoxin--NADP+ reductase [EC:1.18.1.2] | (RefSeq) leaf ferredoxin-NADP reductase	ko00195:Photosynthesis	[C]	Energy production and conversion	Oxidoreductase NAD-binding domain;; Oxidoreductase FAD-binding domain	Ferredoxin--NADP reductase, leaf isozyme, chloroplastic (Precursor) GN=PETH OS=Pisum sativum (Garden pea) PE=1 SV=1	P	Inorganic ion transport and metabolism	Ferredoxin-NADP reductase [Medicago truncatula]
	F01_transcript/16740	4233	3302	4701	13482	13407	12358	478.34	414.11	560.15	1453.09	1333.47	1360.47	3.08135e-43	1.31081	up	[P]	Inorganic ion transport and metabolism	Molecular Function: ferredoxin-NADP+ reductase activity (GO:0004324);; Molecular Function: protein binding (GO:0005515);; Molecular Function: poly(U) RNA binding (GO:0008266);; Cellular Component: chloroplast thylakoid membrane (GO:0009535);; Cellular Component: chloroplast stroma (GO:0009570);; Biological Process: photosynthetic electron transport chain (GO:0009767);; Cellular Component: chlorop…	K02641|2.49756e-149|mtr:MTR_5g022300|K02641 ferredoxin--NADP+ reductase [EC:1.18.1.2] | (RefSeq) leaf ferredoxin-NADP reductase	ko00195:Photosynthesis	[C]	Energy production and conversion	Oxidoreductase NAD-binding domain	Ferredoxin--NADP reductase, leaf isozyme, chloroplastic (Precursor) GN=PETH OS=Pisum sativum (Garden pea) PE=1 SV=1	P	Inorganic ion transport and metabolism	unknown [Medicago truncatula]
PsbY	F01_transcript/19414	1153	1060	1020	1	0	0	274.8	280	251.34	0.23	0	0	0	-12.005	down	--	--	Cellular Component: photosystem II (GO:0009523);; Biological Process: photosynthesis (GO:0015979);; Cellular Component: integral component of membrane (GO:0016021);; Molecular Function: manganese ion binding (GO:0030145);;	K02723|8.02518e-79|mtr:MTR_3g086230|K02723 photosystem II PsbY protein | (RefSeq) photosystem II core complex family psbY protein	ko00195:Photosynthesis	--	--	Photosystem II protein Y (PsbY)	Photosystem II protein psbY-2, chloroplastic (Precursor) GN=PSBY OS=Spinacia oleracea (Spinach) PE=1 SV=2	I	Lipid transport and metabolism	unknown [Medicago truncatula]
PsaA	F01_transcript/13	837	857	855	351	439	267	8.77	9.98	9.61	3.52	4.02	2.71	1.71842e-41	-1.65991	down	[M]	Cell wall/membrane/envelope biogenesis	Molecular Function: magnesium ion binding (GO:0000287);; Molecular Function: electron carrier activity (GO:0009055);; Cellular Component: photosystem I (GO:0009522);; Cellular Component: chloroplast thylakoid membrane (GO:0009535);; Biological Process: photosynthesis (GO:0015979);; Cellular Component: integral component of membrane (GO:0016021);; Molecular Function: chlorophyll binding (GO:001616…	K02689|0|mtr:MetrCp066|K02689 photosystem I P700 chlorophyll a apoprotein A1 | (RefSeq) psaA; photosystem I P700 chlorophyll a apoprotein A1	ko00195:Photosynthesis	--	--	Photosystem I psaA/psaB protein;; Photosystem I psaA/psaB protein;; Tetratricopeptide repeat;; Tetratricopeptide repeat;; Tetratricopeptide repeat;; Tetratricopeptide repeat;; TPR repeat;; Tetratricopeptide repeat;; Tetratricopeptide repeat;; Tetratricopeptide repeat;; Ribosomal protein S14p/S29e	Photosystem I P700 chlorophyll a apoprotein A1 {ECO:0000255|HAMAP-Rule:MF_00458} OS=Pisum sativum (Garden pea) PE=1 SV=2	C	Energy production and conversion	photosystem I P700 chlorophyll A apoprotein A2 [Medicago truncatula]
PsaB	F01_transcript/5172	86	84	104	319	500	349	2.42	2.62	3.12	8.53	12.21	9.45	6.4785e-11	1.70365	up	[M]	Cell wall/membrane/envelope biogenesis	Molecular Function: magnesium ion binding (GO:0000287);; Molecular Function: electron carrier activity (GO:0009055);; Cellular Component: photosystem I (GO:0009522);; Cellular Component: chloroplast thylakoid membrane (GO:0009535);; Biological Process: photosynthesis (GO:0015979);; Cellular Component: integral component of membrane (GO:0016021);; Molecular Function: chlorophyll binding (GO:001616…	K02690|0|mtr:MTR_3g035600|K02690 photosystem I P700 chlorophyll a apoprotein A2 | (RefSeq) photosystem I P700 chlorophyll A apoprotein A2	ko00195:Photosynthesis	--	--	Photosystem I psaA/psaB protein;; Ribosomal protein S14p/S29e	Photosystem I P700 chlorophyll a apoprotein A2 {ECO:0000255|HAMAP-Rule:MF_00482} OS=Lotus japonicus (Lotus corniculatus var. japonicus) PE=3 SV=1	C	Energy production and conversion	photosystem I P700 chlorophyll A apoprotein A2 [Medicago truncatula]
PsaD	F01_transcript/21977	24	19	23	11	8	7	76.97	61.64	62.21	34.2	27.95	21.74	0.00038145	-1.71245	down	--	--	Cellular Component: photosystem I reaction center (GO:0009538);; Biological Process: photosynthesis (GO:0015979);;	K02692|9.3886e-12|mtr:MTR_5g006130|K02692 photosystem I subunit II | (RefSeq) photosystem I reaction center subunit II	ko00195:Photosynthesis	--	--	--	Photosystem I reaction center subunit II, chloroplastic (Precursor) GN=psaD OS=Cucumis sativus (Cucumber) PE=1 SV=1	C	Energy production and conversion	Photosystem I reaction center subunit II [Medicago truncatula]
PsaF	F01_transcript/15487	4126	3679	3866	12153	13848	12543	359.49	355.84	356.63	1010.51	1059.54	1062.88	1.99372e-184	1.34798	up	--	--	Cellular Component: plastid (GO:0009536);; Cellular Component: photosystem I reaction center (GO:0009538);; Biological Process: photosynthesis (GO:0015979);; Cellular Component: integral component of membrane (GO:0016021);;	K02694|9.91521e-126|cam:101506661|K02694 photosystem I subunit III | (RefSeq) photosystem I reaction center subunit III, chloroplastic	ko00195:Photosynthesis	--	--	Photosystem I reaction centre subunit III	Photosystem I reaction center subunit III, chloroplastic (Precursor) GN=PSAF OS=Arabidopsis thaliana (Mouse-ear cress) PE=1 SV=1	S	Function unknown	unknown [Medicago truncatula]
	F01_transcript/16057	719	713	858	8791	10144	9081	68.72	75.68	86.67	801.16	851.44	844.01	0	3.23381	up	--	--	Cellular Component: plastid (GO:0009536);; Cellular Component: photosystem I reaction center (GO:0009538);; Biological Process: photosynthesis (GO:0015979);; Cellular Component: integral component of membrane (GO:0016021);;	K02694|5.71879e-95|cam:101506661|K02694 photosystem I subunit III | (RefSeq) photosystem I reaction center subunit III, chloroplastic	ko00195:Photosynthesis	--	--	Photosystem I reaction centre subunit III	Photosystem I reaction center subunit III, chloroplastic (Precursor) GN=PSAF OS=Flaveria trinervia (Clustered yellowtops) PE=2 SV=1	S	Function unknown	unknown [Medicago truncatula]
	F01_transcript/15408	34710	30964	33481	9680	10406	9352	2999.06	2970.48	3063.43	798.37	789.7	786.03	5.89093e-258	-2.12727	down	--	--	Cellular Component: plastid (GO:0009536);; Cellular Component: photosystem I reaction center (GO:0009538);; Biological Process: photosynthesis (GO:0015979);; Cellular Component: integral component of membrane (GO:0016021);;	K02694|2.18088e-126|cam:101506661|K02694 photosystem I subunit III | (RefSeq) photosystem I reaction center subunit III, chloroplastic	ko00195:Photosynthesis	--	--	Photosystem I reaction centre subunit III	Photosystem I reaction center subunit III, chloroplastic (Precursor) GN=PSAF OS=Arabidopsis thaliana (Mouse-ear cress) PE=1 SV=1	S	Function unknown	unknown [Medicago truncatula]
	F01_transcript/15536	10420	9584	9839	3711	4145	3741	911.54	930.84	911.26	309.88	318.52	318.33	1.93528e-304	-1.74001	down	--	--	Cellular Component: plastid (GO:0009536);; Cellular Component: photosystem I reaction center (GO:0009538);; Biological Process: photosynthesis (GO:0015979);; Cellular Component: integral component of membrane (GO:0016021);;	K02694|2.05773e-94|cam:101506661|K02694 photosystem I subunit III | (RefSeq) photosystem I reaction center subunit III, chloroplastic	ko00195:Photosynthesis	--	--	Photosystem I reaction centre subunit III	Photosystem I reaction center subunit III, chloroplastic (Precursor) GN=PSAF OS=Flaveria trinervia (Clustered yellowtops) PE=2 SV=1	S	Function unknown	unknown [Medicago truncatula]
	F01_transcript/16432	13500	11908	12579	3024	3337	3039	1433.56	1403.69	1410.09	306.39	311.77	314.36	0	-2.38962	down	--	--	Cellular Component: plastid (GO:0009536);; Cellular Component: photosystem I reaction center (GO:0009538);; Biological Process: photosynthesis (GO:0015979);; Cellular Component: integral component of membrane (GO:0016021);;	K02694|5.22106e-127|cam:101506661|K02694 photosystem I subunit III | (RefSeq) photosystem I reaction center subunit III, chloroplastic	ko00195:Photosynthesis	--	--	Photosystem I reaction centre subunit III	Photosystem I reaction center subunit III, chloroplastic (Precursor) GN=PSAF OS=Arabidopsis thaliana (Mouse-ear cress) PE=1 SV=1	S	Function unknown	unknown [Medicago truncatula]
	F01_transcript/16550	2667	2190	2666	422	454	394	294.57	268.56	310.68	44.5	44.15	42.41	2.03036e-147	-2.94042	down	--	--	Cellular Component: plastid (GO:0009536);; Cellular Component: photosystem I reaction center (GO:0009538);; Biological Process: photosynthesis (GO:0015979);; Cellular Component: integral component of membrane (GO:0016021);;	K02694|4.78987e-128|cam:101506661|K02694 photosystem I subunit III | (RefSeq) photosystem I reaction center subunit III, chloroplastic	ko00195:Photosynthesis	--	--	Photosystem I reaction centre subunit III	Photosystem I reaction center subunit III, chloroplastic (Precursor) GN=PSAF OS=Arabidopsis thaliana (Mouse-ear cress) PE=1 SV=1	S	Function unknown	unknown [Medicago truncatula]
alpha	F01_transcript/1971	100	97	75	266	309	239	2.12	2.28	1.69	5.35	5.68	4.88	1.90485e-13	1.19947	up	[C]	Energy production and conversion	Molecular Function: ATP binding (GO:0005524);; Cellular Component: plasma membrane (GO:0005886);; Cellular Component: chloroplast thylakoid membrane (GO:0009535);; Biological Process: ATP synthesis coupled proton transport (GO:0015986);; Biological Process: ATP hydrolysis coupled proton transport (GO:0015991);; Cellular Component: proton-transporting ATP synthase complex, catalytic core F(1) (GO:…	K02111|0|cam:6797510|K02111 F-type H+-transporting ATPase subunit alpha [EC:3.6.3.14] | (RefSeq) atpA, CiarC_p026; ATP synthase CF1 alpha subunit	ko00190:Oxidative phosphorylation;ko00195:Photosynthesis	[C]	Energy production and conversion	ATP synthase alpha/beta family, nucleotide-binding domain;; ATP synthase alpha/beta chain, C terminal domain;; ATP synthase alpha/beta family, beta-barrel domain	ATP synthase subunit alpha, chloroplastic {ECO:0000255|HAMAP-Rule:MF_01346} OS=Lotus japonicus (Lotus corniculatus var. japonicus) PE=3 SV=1	C	Energy production and conversion	ATP synthase CF1 alpha subunit (chloroplast) [Medicago truncatula f. tricycla]
gamma	F01_transcript/12175	1880	1625	1690	8733	10016	8411	91.96	88.3	88.08	407.94	428.72	399.09	0	2.00968	up	[C]	Energy production and conversion	Cellular Component: chloroplast thylakoid membrane (GO:0009535);; Biological Process: ATP synthesis coupled proton transport (GO:0015986);; Cellular Component: proton-transporting ATP synthase complex, catalytic core F(1) (GO:0045261);; Molecular Function: proton-transporting ATP synthase activity, rotational mechanism (GO:0046933);; Molecular Function: proton-transporting ATPase activity, rotati…	K02115|0|gmx:100797290|K02115 F-type H+-transporting ATPase subunit gamma | (RefSeq) ATP synthase gamma chain, chloroplastic	ko00190:Oxidative phosphorylation;ko00195:Photosynthesis	[C]	Energy production and conversion	ATP synthase	ATP synthase gamma chain, chloroplastic (Precursor) GN=ATPC OS=Pisum sativum (Garden pea) PE=2 SV=1	C	Energy production and conversion	unknown [Medicago truncatula]
	F01_transcript/11799	19076	16994	17679	8836	9815	8825	914.53	904.93	902.99	404.68	411.84	410.46	5.57285e-150	-1.34356	down	[C]	Energy production and conversion	Cellular Component: chloroplast thylakoid membrane (GO:0009535);; Biological Process: ATP synthesis coupled proton transport (GO:0015986);; Cellular Component: proton-transporting ATP synthase complex, catalytic core F(1) (GO:0045261);; Molecular Function: proton-transporting ATP synthase activity, rotational mechanism (GO:0046933);; Molecular Function: proton-transporting ATPase activity, rotati…	K02115|0|gmx:100797290|K02115 F-type H+-transporting ATPase subunit gamma | (RefSeq) ATP synthase gamma chain, chloroplastic	ko00190:Oxidative phosphorylation;ko00195:Photosynthesis	[C]	Energy production and conversion	ATP synthase	ATP synthase gamma chain, chloroplastic (Precursor) GN=ATPC OS=Pisum sativum (Garden pea) PE=2 SV=1	C	Energy production and conversion	unknown [Medicago truncatula]
	F01_transcript/16305	823	713	872	158	186	115	84.62	81.41	94.65	15.56	16.85	11.54	1.19208e-94	-2.7755	down	[C]	Energy production and conversion	Cellular Component: chloroplast thylakoid membrane (GO:0009535);; Biological Process: photosynthetic electron transport in photosystem II (GO:0009772);; Cellular Component: chloroplast envelope (GO:0009941);; Biological Process: ATP synthesis coupled proton transport (GO:0015986);; Cellular Component: proton-transporting ATP synthase complex, catalytic core F(1) (GO:0045261);; Molecular Function:…	K02115|6.06814e-139|vvi:100264091|K02115 F-type H+-transporting ATPase subunit gamma | (RefSeq) ATP synthase gamma chain, chloroplastic	ko00190:Oxidative phosphorylation;ko00195:Photosynthesis	[C]	Energy production and conversion	ATP synthase	ATP synthase gamma chain, chloroplastic (Precursor) GN=ATPC OS=Nicotiana tabacum (Common tobacco) PE=1 SV=1	C	Energy production and conversion	unknown [Medicago truncatula]
	F01_transcript/18372	315	269	268	1680	1779	1509	53.47	50.69	47.58	271.76	267.14	250.42	2.6808e-170	2.16862	up	[C]	Energy production and conversion	Molecular Function: ATP binding (GO:0005524);; Cellular Component: chloroplast thylakoid membrane (GO:0009535);; Biological Process: response to cytokinin (GO:0009735);; Cellular Component: chloroplast envelope (GO:0009941);; Molecular Function: hydrogen ion transmembrane transporter activity (GO:0015078);; Biological Process: ATP synthesis coupled proton transport (GO:0015986);; Cellular Compone…	K02109|1.63874e-109|mtr:MTR_3g106820|K02109 F-type H+-transporting ATPase subunit b | (RefSeq) ATP synthase, F0 subunit B	ko00190:Oxidative phosphorylation;ko00195:Photosynthesis	--	--	ATP synthase B/B' CF(0)	ATP synthase subunit b&apos;, chloroplastic (Precursor) GN=ATPG OS=Spinacia oleracea (Spinach) PE=1 SV=2	U	Intracellular trafficking, secretion, and vesicular transport	ATP synthase [Medicago truncatula]
PsaK	F01_transcript/19396	1367	1207	1131	6186	6440	6109	314.11	307.38	269.15	1352.17	1316.13	1377.16	9.40156e-273	1.96499	up	--	--	Cellular Component: photosystem I (GO:0009522);; Cellular Component: chloroplast thylakoid membrane (GO:0009535);; Biological Process: photosynthesis (GO:0015979);; Cellular Component: integral component of membrane (GO:0016021);; Molecular Function: chlorophyll binding (GO:0016168);;	K02698|2.52765e-69|cam:101506632|K02698 photosystem I subunit X | (RefSeq) photosystem I reaction center subunit psaK, chloroplastic	ko00195:Photosynthesis	--	--	Photosystem I psaG / psaK	Photosystem I reaction center subunit psaK, chloroplastic (Precursor) GN=PSAK OS=Medicago sativa (Alfalfa) PE=2 SV=1	S	Function unknown	unknown [Medicago truncatula]
	F01_transcript/18849	1938	1670	1799	920	970	1005	448.33	428.39	430.86	202.65	199.83	228.42	4.54068e-101	-1.27186	down	--	--	Cellular Component: photosystem I (GO:0009522);; Cellular Component: chloroplast thylakoid membrane (GO:0009535);; Biological Process: photosynthesis (GO:0015979);; Cellular Component: integral component of membrane (GO:0016021);; Molecular Function: chlorophyll binding (GO:0016168);;	K02698|2.43681e-69|cam:101506632|K02698 photosystem I subunit X | (RefSeq) photosystem I reaction center subunit psaK, chloroplastic	ko00195:Photosynthesis	--	--	Photosystem I psaG / psaK	Photosystem I reaction center subunit psaK, chloroplastic (Precursor) GN=PSAK OS=Medicago sativa (Alfalfa) PE=2 SV=1	S	Function unknown	unknown [Medicago truncatula]
	F01_transcript/19016	783	661	720	200	194	156	173.67	162.46	165.58	42.21	38.41	33.96	8.08292e-131	-2.35136	down	--	--	Cellular Component: photosystem I (GO:0009522);; Cellular Component: chloroplast thylakoid membrane (GO:0009535);; Biological Process: photosynthesis (GO:0015979);; Cellular Component: integral component of membrane (GO:0016021);; Molecular Function: chlorophyll binding (GO:0016168);;	K02698|9.65271e-67|cam:101506632|K02698 photosystem I subunit X | (RefSeq) photosystem I reaction center subunit psaK, chloroplastic	ko00195:Photosynthesis	--	--	Photosystem I psaG / psaK	Photosystem I reaction center subunit psaK, chloroplastic (Precursor) GN=PSAK OS=Medicago sativa (Alfalfa) PE=2 SV=1	S	Function unknown	RecName: Full=Photosystem I reaction center subunit psaK, chloroplastic; AltName: Full=PSI-K; AltName: Full=Photosystem I subunit X; Flags: Precursor [Medicago sativa]
	F01_transcript/19794	4173	4029	4138	908	895	906	1157.7	1237.46	1179.82	239.63	222.05	247.39	0	-2.56131	down	--	--	Cellular Component: photosystem I (GO:0009522);; Cellular Component: chloroplast thylakoid membrane (GO:0009535);; Biological Process: photosynthesis (GO:0015979);; Cellular Component: integral component of membrane (GO:0016021);; Molecular Function: chlorophyll binding (GO:0016168);;	K02698|1.34844e-69|cam:101506632|K02698 photosystem I subunit X | (RefSeq) photosystem I reaction center subunit psaK, chloroplastic	ko00195:Photosynthesis	--	--	Photosystem I psaG / psaK	Photosystem I reaction center subunit psaK, chloroplastic (Precursor) GN=PSAK OS=Medicago sativa (Alfalfa) PE=2 SV=1	S	Function unknown	unknown [Medicago truncatula]
PsaL	F01_transcript/16196	11329	10102	11378	5083	5628	5632	1160.32	1148.63	1230.91	496.77	507	561.71	3.81505e-124	-1.37833	down	--	--	Cellular Component: plastid (GO:0009536);; Cellular Component: photosystem I reaction center (GO:0009538);; Biological Process: photosynthesis (GO:0015979);; Cellular Component: integral component of membrane (GO:0016021);;	K02699|2.52026e-125|mtr:MTR_7g079900|K02699 photosystem I subunit XI | (RefSeq) photosystem I reaction center subunit XI	ko00195:Photosynthesis	--	--	Photosystem I reaction centre subunit XI	Photosystem I reaction center subunit XI, chloroplastic (Precursor) GN=PSAL OS=Arabidopsis thaliana (Mouse-ear cress) PE=1 SV=2	C	Energy production and conversion	Photosystem I reaction center subunit XI [Medicago truncatula]
PsaO	F01_transcript/18286	4376	3962	4149	12982	14694	12989	696.09	699.29	691.1	1968.07	2066.18	2019.49	3.5513e-177	1.32679	up	--	--	Cellular Component: integral component of membrane (GO:0016021);;	K14332|7.45777e-84|cam:101500027|K14332 photosystem I subunit PsaO | (RefSeq) photosystem I subunit O	ko00195:Photosynthesis	--	--	--	Photosystem I subunit O (Precursor) GN=PSAO OS=Arabidopsis thaliana (Mouse-ear cress) PE=1 SV=1	S	Function unknown	unknown [Medicago truncatula]
	F01_transcript/21357	3	3	13	80	82	47	4.17	4.43	16.45	105.15	111.87	62.85	4.81524e-10	3.07186	up	--	--	--	K14332|6.59774e-07|bdi:100840579|K14332 photosystem I subunit PsaO | (RefSeq) photosystem I subunit O	ko00195:Photosynthesis	--	--	--	Photosystem I subunit O (Precursor) GN=PSAO OS=Arabidopsis thaliana (Mouse-ear cress) PE=1 SV=1	S	Function unknown	unknown [Medicago truncatula]
	F01_transcript/17041	3748	3439	3372	1125	1265	1066	515.07	524.51	486.83	147.48	153.36	142.97	2.03767e-283	-1.9893	down	--	--	Cellular Component: integral component of membrane (GO:0016021);;	K14332|6.7366e-83|cam:101500027|K14332 photosystem I subunit PsaO | (RefSeq) photosystem I subunit O	ko00195:Photosynthesis	--	--	--	Photosystem I subunit O (Precursor) GN=PSAO OS=Arabidopsis thaliana (Mouse-ear cress) PE=1 SV=1	S	Function unknown	unknown [Medicago truncatula]
	F01_transcript/17186	5364	4556	4380	1048	1236	1288	685.29	645.94	588.65	127.78	139.21	160.55	5.84928e-98	-2.37199	down	--	--	Cellular Component: integral component of membrane (GO:0016021);;	K14332|9.93093e-83|cam:101500027|K14332 photosystem I subunit PsaO | (RefSeq) photosystem I subunit O	ko00195:Photosynthesis	--	--	--	Photosystem I subunit O (Precursor) GN=PSAO OS=Arabidopsis thaliana (Mouse-ear cress) PE=1 SV=1	S	Function unknown	unknown [Medicago truncatula]
	F01_transcript/18132	2672	2314	2540	976	974	1012	390.93	375.64	389.82	136.16	125.85	144.61	3.78231e-208	-1.71554	down	--	--	Cellular Component: integral component of membrane (GO:0016021);;	K14332|4.88722e-83|cam:101500027|K14332 photosystem I subunit PsaO | (RefSeq) photosystem I subunit O	ko00195:Photosynthesis	--	--	--	Photosystem I subunit O (Precursor) GN=PSAO OS=Arabidopsis thaliana (Mouse-ear cress) PE=1 SV=1	S	Function unknown	unknown [Medicago truncatula]
	F01_transcript/19162	4851	4087	3855	478	462	462	1079.15	1007.91	889.1	101.33	91.41	100.87	3.93071e-127	-3.55965	down	--	--	Cellular Component: integral component of membrane (GO:0016021);;	K14332|1.82462e-84|cam:101500027|K14332 photosystem I subunit PsaO | (RefSeq) photosystem I subunit O	ko00195:Photosynthesis	--	--	--	Photosystem I subunit O (Precursor) GN=PSAO OS=Arabidopsis thaliana (Mouse-ear cress) PE=1 SV=1	S	Function unknown	unknown [Medicago truncatula]
	F01_transcript/19747	126	95	98	2	1	0	33.82	28.34	27.15	0.54	0.25	0	9.4841e-50	-7.11479	down	--	--	Cellular Component: integral component of membrane (GO:0016021);;	K14332|2.49667e-53|cam:101500027|K14332 photosystem I subunit PsaO | (RefSeq) photosystem I subunit O	ko00195:Photosynthesis	--	--	--	Photosystem I subunit O (Precursor) GN=PSAO OS=Arabidopsis thaliana (Mouse-ear cress) PE=1 SV=1	S	Function unknown	unknown [Medicago truncatula]
	F01_transcript/20623	52	53	53	3	1	2	70.77	76.23	65.38	4.1	1.43	2.89	1.01471e-22	-5.07375	down	--	--	--	K14332|6.59774e-07|bdi:100840579|K14332 photosystem I subunit PsaO | (RefSeq) photosystem I subunit O	ko00195:Photosynthesis	--	--	--	Photosystem I subunit O (Precursor) GN=PSAO OS=Arabidopsis thaliana (Mouse-ear cress) PE=1 SV=1	S	Function unknown	unknown [Medicago truncatula]
A_CK_vs_A_L (A2)
Component		T10_Count	T11_Count	T12_Count	T07_Count	T08_Count	T09_Count	T10_FPKM	T11_FPKM	T12_FPKM	T07_FPKM	T08_FPKM	T09_FPKM	FDR	log2FC	regulated	COG_class	COG_class_annotation	GO_annotation	KEGG_annotation	KEGG_pathway	KOG_class	KOG_class_annotation	Pfam_annotation	Swissprot_annotation	eggNOG_class	eggNOG_class_annotation	nr_annotation
PsbB	F01_transcript/186	4	17	11	528	379	489	0.07	0.21	0.16	7.45	5.48	7.88	5.22689e-44	5.6281	up	[C]	Energy production and conversion	Cellular Component: photosystem II (GO:0009523);; Cellular Component: chloroplast thylakoid membrane (GO:0009535);; Biological Process: photosynthetic electron transport in photosystem II (GO:0009772);; Cellular Component: integral component of membrane (GO:0016021);; Molecular Function: chlorophyll binding (GO:0016168);; Biological Process: protein-chromophore linkage (GO:0018298);; Molecular Fu…	K02704|0|mtr:MTR_4g051370|K02704 photosystem II CP47 chlorophyll apoprotein | (RefSeq) photosystem II CP47 chlorophyll A apoprotein	ko00195:Photosynthesis	--	--	Photosystem II protein;; Cytochrome b/b6/petB;; Cytochrome b(N-terminal)/b6/petB;; Cytochrome b(C-terminal)/b6/petD;; Photosystem II 10 kDa phosphoprotein	Photosystem II CP47 reaction center protein {ECO:0000255|HAMAP-Rule:MF_01495} OS=Cicer arietinum (Chickpea) PE=3 SV=1	S	Function unknown	Photosystem II CP47 chlorophyll apoprotein [Medicago truncatula]
PetB	F01_transcript/12457	90	120	96	43	32	23	4.54	5.53	4.92	2.33	1.74	1.42	1.43375e-07	-1.49895	down	[C]	Energy production and conversion	Molecular Function: iron ion binding (GO:0005506);; Cellular Component: cytochrome b6f complex (GO:0009512);; Cellular Component: chloroplast thylakoid membrane (GO:0009535);; Cellular Component: integral component of membrane (GO:0016021);; Molecular Function: oxidoreductase activity (GO:0016491);; Biological Process: photosynthesis, light reaction (GO:0019684);; Molecular Function: heme binding…	K02635|4.45022e-109|cam:6797553|K02635 cytochrome b6 | (RefSeq) petB, CiarC_p049; cytochrome b6	ko00195:Photosynthesis	[C]	Energy production and conversion	Cytochrome b(C-terminal)/b6/petD;; Cytochrome b/b6/petB;; Domain of unknown function (DUF4405)	Cytochrome b6 {ECO:0000255|HAMAP-Rule:MF_00633} OS=Oenothera elata subsp. hookeri (Hooker&apos;s evening primrose) PE=3 SV=2	C	Energy production and conversion	unknown [Medicago truncatula]
	F01_transcript/413	247	320	264	93	92	64	3.65	4.33	3.96	1.47	1.48	1.15	7.21657e-21	-1.58963	down	[C]	Energy production and conversion	Molecular Function: iron ion binding (GO:0005506);; Cellular Component: chloroplast thylakoid membrane (GO:0009535);; Biological Process: photosynthesis (GO:0015979);; Cellular Component: integral component of membrane (GO:0016021);; Molecular Function: oxidoreductase activity (GO:0016491);; Molecular Function: heme binding (GO:0020037);; Biological Process: respiratory electron transport chain (…	K02635|3.69234e-141|cmo:103504414|K02635 cytochrome b6 | (RefSeq) cytochrome b6	ko00195:Photosynthesis	[C]	Energy production and conversion	Cytochrome b/b6/petB;; Cytochrome b(N-terminal)/b6/petB;; Photosystem II protein;; Cytochrome b(C-terminal)/b6/petD;; Photosystem II 10 kDa phosphoprotein	Cytochrome b6 {ECO:0000255|HAMAP-Rule:MF_00633} OS=Oenothera elata subsp. hookeri (Hooker&apos;s evening primrose) PE=3 SV=2	C	Energy production and conversion	PREDICTED: LOW QUALITY PROTEIN: cytochrome b6, partial [Cucumis melo]
PetC	F01_transcript/21686	94	64	75	249	285	246	179.39	132.57	143.79	434.71	537.05	566.52	9.1901e-29	1.89035	up	[C]	Energy production and conversion	Molecular Function: plastoquinol--plastocyanin reductase activity (GO:0009496);; Cellular Component: chloroplast thylakoid membrane (GO:0009535);; Biological Process: photosynthesis (GO:0015979);; Cellular Component: integral component of membrane (GO:0016021);; Molecular Function: electron transporter, transferring electrons within cytochrome b6/f complex of photosystem II activity (GO:0045158);…	K02636|5.30929e-27|mtr:MTR_2g089510|K02636 cytochrome b6-f complex iron-sulfur subunit [EC:1.10.9.1] | (RefSeq) cytochrome b6-F complex iron-sulfur subunit	ko00195:Photosynthesis	[C]	Energy production and conversion	--	Cytochrome b6-f complex iron-sulfur subunit, chloroplastic (Precursor) GN=petC OS=Pisum sativum (Garden pea) PE=2 SV=1	C	Energy production and conversion	Cytochrome b6-f complex iron-sulfur subunit [Medicago truncatula]
PsbO	F01_transcript/14445	4485	4939	4628	853	803	745	348.21	352.62	365.95	69.73	67.15	69.84	0	-2.39514	down	--	--	Molecular Function: calcium ion binding (GO:0005509);; Cellular Component: chloroplast thylakoid membrane (GO:0009535);; Cellular Component: photosystem II oxygen evolving complex (GO:0009654);; Cellular Component: integral component of membrane (GO:0016021);; Cellular Component: extrinsic component of membrane (GO:0019898);; Biological Process: photosystem II stabilization (GO:0042549);;	K02716|0|mtr:MTR_5g018670|K02716 photosystem II oxygen-evolving enhancer protein 1 | (RefSeq) photosystem II oxygen-evolving enhancer protein	ko00195:Photosynthesis	--	--	Manganese-stabilising protein / photosystem II polypeptide	Oxygen-evolving enhancer protein 1, chloroplastic (Precursor) GN=PSBO OS=Pisum sativum (Garden pea) PE=2 SV=1	G	Carbohydrate transport and metabolism	Oxygen evolving enhancer protein [Medicago truncatula]
PsbP	F01_transcript/15420	8793	9314	9187	402	332	369	725.24	706.78	772.16	34.94	29.46	36.82	0	-4.47314	down	--	--	Molecular Function: calcium ion binding (GO:0005509);; Cellular Component: chloroplast thylakoid membrane (GO:0009535);; Cellular Component: photosystem II oxygen evolving complex (GO:0009654);; Biological Process: photosynthesis (GO:0015979);; Cellular Component: extrinsic component of membrane (GO:0019898);;	K02717|1.90406e-150|cam:101514916|K02717 photosystem II oxygen-evolving enhancer protein 2 | (RefSeq) oxygen-evolving enhancer protein 2, chloroplastic	ko00195:Photosynthesis	--	--	PsbP	Oxygen-evolving enhancer protein 2, chloroplastic (Precursor) GN=PSBP OS=Pisum sativum (Garden pea) PE=1 SV=1	S	Function unknown	unknown [Medicago truncatula]
PsbQ	F01_transcript/17244	183	198	205	471	394	394	22.44	22.37	25.68	60.33	51.56	58.18	1.31019e-27	1.25433	up	--	--	Molecular Function: calcium ion binding (GO:0005509);; Cellular Component: photosystem II oxygen evolving complex (GO:0009654);; Biological Process: photosynthesis (GO:0015979);; Cellular Component: extrinsic component of membrane (GO:0019898);;	K08901|3.0785e-104|mtr:MTR_5g041910|K08901 photosystem II oxygen-evolving enhancer protein 3 | (RefSeq) oxygen-evolving enhancer protein	ko00195:Photosynthesis	--	--	Oxygen evolving enhancer protein 3 (PsbQ)	PsbQ-like protein 1, chloroplastic (Precursor) GN=F7A19.23 OS=Arabidopsis thaliana (Mouse-ear cress) PE=1 SV=1	S	Function unknown	unknown [Medicago truncatula]
PsbS	F01_transcript/20947	19	26	20	5	3	11	14.53	19.72	15.88	3.78	2.34	10.15	0.00121633	-1.5667	down	--	--	Cellular Component: photosystem II (GO:0009523);; Cellular Component: chloroplast thylakoid membrane (GO:0009535);; Biological Process: photosynthesis (GO:0015979);; Cellular Component: integral component of membrane (GO:0016021);;	K03542|7.20718e-26|mtr:MTR_3g088040|K03542 photosystem II 22kDa protein | (RefSeq) light-harvesting complex I chlorophyll A/B-binding protein	ko00195:Photosynthesis	--	--	--	Photosystem II 22 kDa protein, chloroplastic (Precursor) GN=PSBS OS=Spinacia oleracea (Spinach) PE=1 SV=1	I	Lipid transport and metabolism	Photosystem II 22 kDa protein [Medicago truncatula]
PsbW	F01_transcript/18209	1716	1745	1651	7033	7709	7691	264.13	249.19	260.69	1133.73	1268.24	1431.85	3.86828e-42	2.29365	up	--	--	Cellular Component: chloroplast (GO:0009507);; Cellular Component: photosystem II (GO:0009523);; Biological Process: photosynthesis (GO:0015979);; Cellular Component: integral component of membrane (GO:0016021);;	K02721|7.24085e-30|cam:101513777|K02721 photosystem II PsbW protein | (RefSeq) photosystem II reaction center W protein, chloroplastic-like	ko00195:Photosynthesis	--	--	Photosystem II reaction centre W protein (PsbW);; Photosystem II reaction centre W protein (PsbW)	Photosystem II reaction center W protein, chloroplastic (Precursor) GN=psbW OS=Spinacia oleracea (Spinach) PE=1 SV=1	S	Function unknown	photosystem II reaction center W [Medicago truncatula]
	F01_transcript/17948	28716	30456	28404	12228	13046	12448	3958.43	3887.87	4010.35	1767.25	1925.09	2074.89	3.83435e-96	-1.05694	down	--	--	Cellular Component: chloroplast (GO:0009507);; Cellular Component: photosystem II (GO:0009523);; Biological Process: photosynthesis (GO:0015979);; Cellular Component: integral component of membrane (GO:0016021);;	K02721|2.05662e-42|cam:101513777|K02721 photosystem II PsbW protein | (RefSeq) photosystem II reaction center W protein, chloroplastic-like	ko00195:Photosynthesis	--	--	Photosystem II reaction centre W protein (PsbW)	Photosystem II reaction center W protein, chloroplastic (Precursor) GN=psbW OS=Spinacia oleracea (Spinach) PE=1 SV=1	S	Function unknown	unknown [Medicago truncatula]
PetF	F01_transcript/17507	5417	5013	4893	10444	10502	10006	696.26	596.01	643.55	1408.05	1445.99	1554.54	1.46545e-58	1.16859	up	[C]	Energy production and conversion	Molecular Function: protein binding (GO:0005515);; Molecular Function: electron carrier activity (GO:0009055);; Cellular Component: chloroplast (GO:0009507);; Biological Process: electron transport chain (GO:0022900);; Molecular Function: metal ion binding (GO:0046872);; Molecular Function: 2 iron, 2 sulfur cluster binding (GO:0051537);;	K02639|2.48004e-82|mtr:MTR_2g006290|K02639 ferredoxin | (RefSeq) 2Fe-2S ferredoxin superfamily protein	ko00195:Photosynthesis	--	--	2Fe-2S iron-sulfur cluster binding domain	Ferredoxin-1, chloroplastic (Precursor) GN=PETF OS=Pisum sativum (Garden pea) PE=1 SV=2	C	Energy production and conversion	Ferredoxin I [Medicago truncatula]
	F01_transcript/18142	120	68	73	192	284	195	18.48	9.73	11.64	30.9	46.72	36.35	4.12027e-06	1.50692	up	[C]	Energy production and conversion	Molecular Function: electron carrier activity (GO:0009055);; Biological Process: electron transport chain (GO:0022900);; Molecular Function: metal ion binding (GO:0046872);; Molecular Function: 2 iron, 2 sulfur cluster binding (GO:0051537);;	K02639|2.08001e-97|mtr:MTR_8g088720|K02639 ferredoxin | (RefSeq) 2Fe-2S ferredoxin superfamily protein	ko00195:Photosynthesis	--	--	2Fe-2S iron-sulfur cluster binding domain	Ferredoxin-1, chloroplastic (Precursor) GN=SEND33 OS=Solanum lycopersicum (Tomato) PE=2 SV=1	C	Energy production and conversion	Ferredoxin I [Medicago truncatula]
	F01_transcript/16064	1112	1142	1112	200	220	242	102.34	96.79	104.34	19.35	21.82	26.9	9.89419e-136	-2.18257	down	[C]	Energy production and conversion	Molecular Function: electron carrier activity (GO:0009055);; Cellular Component: chloroplast (GO:0009507);; Biological Process: electron transport chain (GO:0022900);; Molecular Function: metal ion binding (GO:0046872);; Molecular Function: 2 iron, 2 sulfur cluster binding (GO:0051537);;	K02639|4.11712e-124|mtr:MTR_4g098490|K02639 ferredoxin | (RefSeq) 2Fe-2S ferredoxin superfamily protein	ko00195:Photosynthesis	--	--	2Fe-2S iron-sulfur cluster binding domain	Ferredoxin-A OS=Alocasia macrorrhizos (Giant taro) PE=1 SV=1	C	Energy production and conversion	Ferredoxin-6 [Medicago truncatula]
	F01_transcript/17401	3512	4049	3718	1297	1368	1226	479.8	512.16	520.2	185.85	200.19	202.54	2.03027e-121	-1.37891	down	[C]	Energy production and conversion	Molecular Function: protein binding (GO:0005515);; Molecular Function: electron carrier activity (GO:0009055);; Cellular Component: chloroplast (GO:0009507);; Biological Process: electron transport chain (GO:0022900);; Molecular Function: metal ion binding (GO:0046872);; Molecular Function: 2 iron, 2 sulfur cluster binding (GO:0051537);;	K02639|1.73835e-82|mtr:MTR_2g006290|K02639 ferredoxin | (RefSeq) 2Fe-2S ferredoxin superfamily protein	ko00195:Photosynthesis	--	--	2Fe-2S iron-sulfur cluster binding domain	Ferredoxin-1, chloroplastic (Precursor) GN=PETF OS=Pisum sativum (Garden pea) PE=1 SV=2	C	Energy production and conversion	Ferredoxin I [Medicago truncatula]
	F01_transcript/18712	69	92	99	10	8	15	12.42	15.26	18.12	1.88	1.64	3.25	2.48791e-15	-2.80053	down	[C]	Energy production and conversion	Molecular Function: protein binding (GO:0005515);; Molecular Function: electron carrier activity (GO:0009055);; Cellular Component: chloroplast (GO:0009507);; Biological Process: electron transport chain (GO:0022900);; Molecular Function: metal ion binding (GO:0046872);; Molecular Function: 2 iron, 2 sulfur cluster binding (GO:0051537);;	K02639|2.72355e-66|mtr:MTR_2g006290|K02639 ferredoxin | (RefSeq) 2Fe-2S ferredoxin superfamily protein	ko00195:Photosynthesis	--	--	2Fe-2S iron-sulfur cluster binding domain	Ferredoxin-1, chloroplastic (Precursor) GN=PETF OS=Pisum sativum (Garden pea) PE=1 SV=2	C	Energy production and conversion	Ferredoxin I [Medicago truncatula]
PetH	F01_transcript/12300	4811	4792	4341	25957	25798	22970	231.54	211.34	212.22	1316.31	1339.71	1333.43	0	2.57557	up	[P]	Inorganic ion transport and metabolism	Molecular Function: nucleotide binding (GO:0000166);; Molecular Function: ferredoxin-NADP+ reductase activity (GO:0004324);; Molecular Function: protein binding (GO:0005515);; Molecular Function: poly(U) RNA binding (GO:0008266);; Cellular Component: chloroplast thylakoid membrane (GO:0009535);; Cellular Component: chloroplast stroma (GO:0009570);; Biological Process: photosynthetic electron tran…	K02641|0|mtr:MTR_5g022300|K02641 ferredoxin--NADP+ reductase [EC:1.18.1.2] | (RefSeq) leaf ferredoxin-NADP reductase	ko00195:Photosynthesis	[C]	Energy production and conversion	Oxidoreductase NAD-binding domain;; Oxidoreductase FAD-binding domain	Ferredoxin--NADP reductase, leaf isozyme, chloroplastic (Precursor) GN=PETH OS=Pisum sativum (Garden pea) PE=1 SV=1	P	Inorganic ion transport and metabolism	Ferredoxin-NADP reductase [Medicago truncatula]
	F01_transcript/13104	80	44	55	22	4	4	4.4	2.25	3.09	1.32	0.26	0.29	8.89527e-05	-2.48007	down	[P]	Inorganic ion transport and metabolism	Molecular Function: ferredoxin-NADP+ reductase activity (GO:0004324);; Molecular Function: protein binding (GO:0005515);; Molecular Function: poly(U) RNA binding (GO:0008266);; Cellular Component: chloroplast thylakoid membrane (GO:0009535);; Cellular Component: chloroplast stroma (GO:0009570);; Biological Process: photosynthetic electron transport chain (GO:0009767);; Cellular Component: chlorop…	K02641|0|mtr:MTR_5g022300|K02641 ferredoxin--NADP+ reductase [EC:1.18.1.2] | (RefSeq) leaf ferredoxin-NADP reductase	ko00195:Photosynthesis	[C]	Energy production and conversion	Oxidoreductase NAD-binding domain;; Oxidoreductase FAD-binding domain	Ferredoxin--NADP reductase, chloroplastic (Precursor) GN=PETH OS=Vicia faba (Broad bean) PE=2 SV=1	P	Inorganic ion transport and metabolism	Ferredoxin-NADP reductase [Medicago truncatula]
	F01_transcript/13117	12975	14134	12531	85	103	45	671.67	670.82	659.21	4.67	5.77	2.84	0	-7.27501	down	[P]	Inorganic ion transport and metabolism	Molecular Function: nucleotide binding (GO:0000166);; Molecular Function: ferredoxin-NADP+ reductase activity (GO:0004324);; Molecular Function: protein binding (GO:0005515);; Molecular Function: poly(U) RNA binding (GO:0008266);; Cellular Component: chloroplast thylakoid membrane (GO:0009535);; Cellular Component: chloroplast stroma (GO:0009570);; Biological Process: photosynthetic electron tran…	K02641|0|mtr:MTR_5g022300|K02641 ferredoxin--NADP+ reductase [EC:1.18.1.2] | (RefSeq) leaf ferredoxin-NADP reductase	ko00195:Photosynthesis	[C]	Energy production and conversion	Oxidoreductase NAD-binding domain;; Oxidoreductase FAD-binding domain	Ferredoxin--NADP reductase, leaf isozyme, chloroplastic (Precursor) GN=PETH OS=Pisum sativum (Garden pea) PE=1 SV=1	P	Inorganic ion transport and metabolism	Ferredoxin-NADP reductase [Medicago truncatula]
	F01_transcript/13755	12606	14724	13738	7323	5275	4453	768.47	823.8	851.71	470.13	346.67	327.61	3.02863e-18	-1.12472	down	[P]	Inorganic ion transport and metabolism	Molecular Function: ferredoxin-NADP+ reductase activity (GO:0004324);; Molecular Function: protein binding (GO:0005515);; Molecular Function: poly(U) RNA binding (GO:0008266);; Cellular Component: chloroplast thylakoid membrane (GO:0009535);; Cellular Component: chloroplast stroma (GO:0009570);; Biological Process: photosynthetic electron transport chain (GO:0009767);; Cellular Component: chlorop…	K02641|0|mtr:MTR_5g022300|K02641 ferredoxin--NADP+ reductase [EC:1.18.1.2] | (RefSeq) leaf ferredoxin-NADP reductase	ko00195:Photosynthesis	[C]	Energy production and conversion	Oxidoreductase NAD-binding domain;; Oxidoreductase FAD-binding domain	Ferredoxin--NADP reductase, leaf isozyme, chloroplastic (Precursor) GN=PETH OS=Pisum sativum (Garden pea) PE=1 SV=1	P	Inorganic ion transport and metabolism	Ferredoxin-NADP reductase [Medicago truncatula]
PsbY	F01_transcript/19414	1	0	0	2760	2783	2605	0.23	0	0	652.38	670.07	715.79	0	13.1202	up	--	--	Cellular Component: photosystem II (GO:0009523);; Biological Process: photosynthesis (GO:0015979);; Cellular Component: integral component of membrane (GO:0016021);; Molecular Function: manganese ion binding (GO:0030145);;	K02723|8.02518e-79|mtr:MTR_3g086230|K02723 photosystem II PsbY protein | (RefSeq) photosystem II core complex family psbY protein	ko00195:Photosynthesis	--	--	Photosystem II protein Y (PsbY)	Photosystem II protein psbY-2, chloroplastic (Precursor) GN=PSBY OS=Spinacia oleracea (Spinach) PE=1 SV=2	I	Lipid transport and metabolism	unknown [Medicago truncatula]
	F01_transcript/20767	764	761	820	1540	1549	1257	386.63	373.03	430.77	790.44	813.31	773.22	2.37804e-40	1.03644	up	--	--	Cellular Component: photosystem II (GO:0009523);; Biological Process: photosynthesis (GO:0015979);; Cellular Component: integral component of membrane (GO:0016021);; Molecular Function: manganese ion binding (GO:0030145);;	K02723|1.82828e-44|mtr:MTR_3g086230|K02723 photosystem II PsbY protein | (RefSeq) photosystem II core complex family psbY protein	ko00195:Photosynthesis	--	--	Photosystem II protein Y (PsbY)	Photosystem II protein psbY-2, chloroplastic (Precursor) GN=PSBY OS=Spinacia oleracea (Spinach) PE=1 SV=2	I	Lipid transport and metabolism	unknown [Medicago truncatula]
Psb27	F01_transcript/17189	97	155	154	838	841	775	11.52	16.92	18.6	103.72	106.3	110.46	7.50885e-171	2.75249	up	--	--	Cellular Component: chloroplast thylakoid lumen (GO:0009543);; Biological Process: photosystem II repair (GO:0010206);; Biological Process: photosystem II assembly (GO:0010207);;	K08902|5.02003e-74|cam:101500783|K08902 photosystem II Psb27 protein | (RefSeq) photosystem II repair protein PSB27-H1, chloroplastic	ko00195:Photosynthesis	--	--	Photosystem II Pbs27	Photosystem II repair protein PSB27-H1, chloroplastic (Precursor) OS=Arabidopsis thaliana (Mouse-ear cress) PE=1 SV=1	G	Carbohydrate transport and metabolism	photosystem II Pbs27 protein [Medicago truncatula]
	F01_transcript/17718	786	868	726	301	303	275	114.11	116.8	108	45.88	47.05	48.25	1.4089e-48	-1.27946	down	--	--	Cellular Component: chloroplast thylakoid lumen (GO:0009543);; Biological Process: photosystem II repair (GO:0010206);; Biological Process: photosystem II assembly (GO:0010207);;	K08902|4.7607e-76|cam:101500783|K08902 photosystem II Psb27 protein | (RefSeq) photosystem II repair protein PSB27-H1, chloroplastic	ko00195:Photosynthesis	--	--	Photosystem II Pbs27	Photosystem II repair protein PSB27-H1, chloroplastic (Precursor) OS=Arabidopsis thaliana (Mouse-ear cress) PE=1 SV=1	G	Carbohydrate transport and metabolism	photosystem II Pbs27 protein [Medicago truncatula]
PsaA	F01_transcript/13	351	439	267	1301	963	1128	3.52	4.02	2.71	13.77	10.45	13.63	2.19069e-17	1.84978	up	[M]	Cell wall/membrane/envelope biogenesis	Molecular Function: magnesium ion binding (GO:0000287);; Molecular Function: electron carrier activity (GO:0009055);; Cellular Component: photosystem I (GO:0009522);; Cellular Component: chloroplast thylakoid membrane (GO:0009535);; Biological Process: photosynthesis (GO:0015979);; Cellular Component: integral component of membrane (GO:0016021);; Molecular Function: chlorophyll binding (GO:001616…	K02689|0|mtr:MetrCp066|K02689 photosystem I P700 chlorophyll a apoprotein A1 | (RefSeq) psaA; photosystem I P700 chlorophyll a apoprotein A1	ko00195:Photosynthesis	--	--	Photosystem I psaA/psaB protein;; Photosystem I psaA/psaB protein;; Tetratricopeptide repeat;; Tetratricopeptide repeat;; Tetratricopeptide repeat;; Tetratricopeptide repeat;; TPR repeat;; Tetratricopeptide repeat;; Tetratricopeptide repeat;; Tetratricopeptide repeat;; Ribosomal protein S14p/S29e	Photosystem I P700 chlorophyll a apoprotein A1 {ECO:0000255|HAMAP-Rule:MF_00458} OS=Pisum sativum (Garden pea) PE=1 SV=2	C	Energy production and conversion	photosystem I P700 chlorophyll A apoprotein A2 [Medicago truncatula]
PsaB	F01_transcript/5145	6	15	0	86	48	34	0.17	0.36	0	2.43	1.37	1.08	5.11402e-05	3.18972	up	[M]	Cell wall/membrane/envelope biogenesis	Molecular Function: magnesium ion binding (GO:0000287);; Molecular Function: electron carrier activity (GO:0009055);; Cellular Component: photosystem I (GO:0009522);; Cellular Component: chloroplast thylakoid membrane (GO:0009535);; Biological Process: photosynthesis (GO:0015979);; Cellular Component: integral component of membrane (GO:0016021);; Molecular Function: chlorophyll binding (GO:001616…	K02690|0|mtr:MTR_3g035600|K02690 photosystem I P700 chlorophyll a apoprotein A2 | (RefSeq) photosystem I P700 chlorophyll A apoprotein A2	ko00195:Photosynthesis	--	--	Photosystem I psaA/psaB protein;; Ribosomal protein S14p/S29e;; Photosystem I psaA/psaB protein	Photosystem I P700 chlorophyll a apoprotein A2 {ECO:0000255|HAMAP-Rule:MF_00482} OS=Lotus japonicus (Lotus corniculatus var. japonicus) PE=3 SV=1	C	Energy production and conversion	photosystem I P700 chlorophyll A apoprotein A2 [Medicago truncatula]
PsaD	F01_transcript/16357	7556	8448	7635	18088	19617	17470	756.72	780.04	780.46	1903.21	2110.09	2113.35	1.18191e-72	1.37994	up	--	--	Cellular Component: chloroplast thylakoid membrane (GO:0009535);; Cellular Component: photosystem I reaction center (GO:0009538);; Biological Process: photosynthesis (GO:0015979);;	K02692|1.09161e-145|mtr:MTR_5g006130|K02692 photosystem I subunit II | (RefSeq) photosystem I reaction center subunit II	ko00195:Photosynthesis	--	--	PsaD	Photosystem I reaction center subunit II, chloroplastic (Precursor) GN=psaD OS=Cucumis sativus (Cucumber) PE=1 SV=1	C	Energy production and conversion	Photosystem I reaction center subunit II [Medicago truncatula]
	F01_transcript/19621	1081	1029	1039	2821	2738	2276	281.75	252.03	280.08	764.2	755.23	719.22	2.81516e-116	1.46249	up	--	--	Cellular Component: chloroplast thylakoid membrane (GO:0009535);; Cellular Component: photosystem I reaction center (GO:0009538);; Biological Process: photosynthesis (GO:0015979);;	K02692|1.23455e-80|mtr:MTR_5g006130|K02692 photosystem I subunit II | (RefSeq) photosystem I reaction center subunit II	ko00195:Photosynthesis	--	--	PsaD	Photosystem I reaction center subunit II, chloroplastic (Precursor) GN=psaD OS=Cucumis sativus (Cucumber) PE=1 SV=1	C	Energy production and conversion	Photosystem I reaction center subunit II [Medicago truncatula]
	F01_transcript/20974	414	419	370	48	55	42	320.21	323.53	295.97	36.81	44.14	39.86	1.00986e-70	-2.90039	down	--	--	Cellular Component: chloroplast thylakoid membrane (GO:0009535);; Cellular Component: photosystem I reaction center (GO:0009538);; Biological Process: photosynthesis (GO:0015979);;	K02692|7.75912e-42|mtr:MTR_5g006130|K02692 photosystem I subunit II | (RefSeq) photosystem I reaction center subunit II	ko00195:Photosynthesis	--	--	PsaD	Photosystem I reaction center subunit II, chloroplastic (Precursor) GN=psaD OS=Cucumis sativus (Cucumber) PE=1 SV=1	C	Energy production and conversion	Photosystem I reaction center subunit II [Medicago truncatula]
PsaF	F01_transcript/16432	3024	3337	3039	12746	12484	11408	306.39	311.77	314.36	1356.68	1358.38	1396.13	0	2.11771	up	--	--	Cellular Component: plastid (GO:0009536);; Cellular Component: photosystem I reaction center (GO:0009538);; Biological Process: photosynthesis (GO:0015979);; Cellular Component: integral component of membrane (GO:0016021);;	K02694|5.22106e-127|cam:101506661|K02694 photosystem I subunit III | (RefSeq) photosystem I reaction center subunit III, chloroplastic	ko00195:Photosynthesis	--	--	Photosystem I reaction centre subunit III	Photosystem I reaction center subunit III, chloroplastic (Precursor) GN=PSAF OS=Arabidopsis thaliana (Mouse-ear cress) PE=1 SV=1	S	Function unknown	unknown [Medicago truncatula]
	F01_transcript/16550	422	454	394	2318	2212	1934	44.5	44.15	42.41	256.57	250.24	246.23	0	2.50115	up	--	--	Cellular Component: plastid (GO:0009536);; Cellular Component: photosystem I reaction center (GO:0009538);; Biological Process: photosynthesis (GO:0015979);; Cellular Component: integral component of membrane (GO:0016021);;	K02694|4.78987e-128|cam:101506661|K02694 photosystem I subunit III | (RefSeq) photosystem I reaction center subunit III, chloroplastic	ko00195:Photosynthesis	--	--	Photosystem I reaction centre subunit III	Photosystem I reaction center subunit III, chloroplastic (Precursor) GN=PSAF OS=Arabidopsis thaliana (Mouse-ear cress) PE=1 SV=1	S	Function unknown	unknown [Medicago truncatula]
	F01_transcript/16057	8791	10144	9081	2606	2205	1836	801.16	851.44	844.01	249.72	216.1	202.1	1.46737e-214	-1.92712	down	--	--	Cellular Component: plastid (GO:0009536);; Cellular Component: photosystem I reaction center (GO:0009538);; Biological Process: photosynthesis (GO:0015979);; Cellular Component: integral component of membrane (GO:0016021);;	K02694|5.71879e-95|cam:101506661|K02694 photosystem I subunit III | (RefSeq) photosystem I reaction center subunit III, chloroplastic	ko00195:Photosynthesis	--	--	Photosystem I reaction centre subunit III	Photosystem I reaction center subunit III, chloroplastic (Precursor) GN=PSAF OS=Flaveria trinervia (Clustered yellowtops) PE=2 SV=1	S	Function unknown	unknown [Medicago truncatula]
beta	F01_transcript/5015	79	156	95	46	61	31	2.16	3.89	2.62	1.33	1.82	1.04	0.00766142	-1.10027	down	[C]	Energy production and conversion	Molecular Function: ATP binding (GO:0005524);; Cellular Component: plasma membrane (GO:0005886);; Cellular Component: chloroplast thylakoid membrane (GO:0009535);; Biological Process: ATP synthesis coupled proton transport (GO:0015986);; Biological Process: ATP hydrolysis coupled proton transport (GO:0015991);; Cellular Component: integral component of membrane (GO:0016021);; Cellular Component: …	K02112|0|mtr:MetrCp073|K02112 F-type H+-transporting ATPase subunit beta [EC:3.6.3.14] | (RefSeq) atpB; ATP synthase CF1 beta subunit	ko00190:Oxidative phosphorylation;ko00195:Photosynthesis	[C]	Energy production and conversion	ATP synthase alpha/beta family, nucleotide-binding domain;; ATP synthase alpha/beta family, beta-barrel domain;; ATPase family associated with various cellular activities (AAA);; ATP synthase, Delta/Epsilon chain, beta-sandwich domain;; ATP synthase, Delta/Epsilon chain, long alpha-helix domain	ATP synthase subunit beta, chloroplastic {ECO:0000255|HAMAP-Rule:MF_01347} OS=Medicago sativa (Alfalfa) PE=3 SV=1	C	Energy production and conversion	RecName: Full=ATP synthase subunit beta, chloroplastic; AltName: Full=ATP synthase F1 sector subunit beta; AltName: Full=F-ATPase subunit beta (chloroplast) [Medicago sativa]
gamma	F01_transcript/11799	8836	9815	8825	18090	17855	16213	404.68	411.84	410.46	873.25	882.68	895.69	6.55734e-145	1.08014	up	[C]	Energy production and conversion	Cellular Component: chloroplast thylakoid membrane (GO:0009535);; Biological Process: ATP synthesis coupled proton transport (GO:0015986);; Cellular Component: proton-transporting ATP synthase complex, catalytic core F(1) (GO:0045261);; Molecular Function: proton-transporting ATP synthase activity, rotational mechanism (GO:0046933);; Molecular Function: proton-transporting ATPase activity, rotati…	K02115|0|gmx:100797290|K02115 F-type H+-transporting ATPase subunit gamma | (RefSeq) ATP synthase gamma chain, chloroplastic	ko00190:Oxidative phosphorylation;ko00195:Photosynthesis	[C]	Energy production and conversion	ATP synthase	ATP synthase gamma chain, chloroplastic (Precursor) GN=ATPC OS=Pisum sativum (Garden pea) PE=2 SV=1	C	Energy production and conversion	unknown [Medicago truncatula]
	F01_transcript/16305	158	186	115	1234	1246	1099	15.56	16.85	11.54	127.18	131.32	130.15	1.53257e-271	3.1269	up	[C]	Energy production and conversion	Cellular Component: chloroplast thylakoid membrane (GO:0009535);; Biological Process: photosynthetic electron transport in photosystem II (GO:0009772);; Cellular Component: chloroplast envelope (GO:0009941);; Biological Process: ATP synthesis coupled proton transport (GO:0015986);; Cellular Component: proton-transporting ATP synthase complex, catalytic core F(1) (GO:0045261);; Molecular Function:…	K02115|6.06814e-139|vvi:100264091|K02115 F-type H+-transporting ATPase subunit gamma | (RefSeq) ATP synthase gamma chain, chloroplastic	ko00190:Oxidative phosphorylation;ko00195:Photosynthesis	[C]	Energy production and conversion	ATP synthase	ATP synthase gamma chain, chloroplastic (Precursor) GN=ATPC OS=Nicotiana tabacum (Common tobacco) PE=1 SV=1	C	Energy production and conversion	unknown [Medicago truncatula]
PsaK	F01_transcript/19794	908	895	906	5376	5807	5193	239.63	222.05	247.39	1474.7	1621.84	1662.1	1.08777e-180	2.7491	up	--	--	Cellular Component: photosystem I (GO:0009522);; Cellular Component: chloroplast thylakoid membrane (GO:0009535);; Biological Process: photosynthesis (GO:0015979);; Cellular Component: integral component of membrane (GO:0016021);; Molecular Function: chlorophyll binding (GO:0016168);;	K02698|1.34844e-69|cam:101506632|K02698 photosystem I subunit X | (RefSeq) photosystem I reaction center subunit psaK, chloroplastic	ko00195:Photosynthesis	--	--	Photosystem I psaG / psaK	Photosystem I reaction center subunit psaK, chloroplastic (Precursor) GN=PSAK OS=Medicago sativa (Alfalfa) PE=2 SV=1	S	Function unknown	unknown [Medicago truncatula]
	F01_transcript/19199	1299	1350	1233	475	460	464	279.02	271.03	272.99	106.61	105.05	120.77	3.85816e-73	-1.31428	down	--	--	Cellular Component: photosystem I (GO:0009522);; Cellular Component: chloroplast thylakoid membrane (GO:0009535);; Biological Process: photosynthesis (GO:0015979);; Cellular Component: integral component of membrane (GO:0016021);; Molecular Function: chlorophyll binding (GO:0016168);;	K02698|2.62177e-69|cam:101506632|K02698 photosystem I subunit X | (RefSeq) photosystem I reaction center subunit psaK, chloroplastic	ko00195:Photosynthesis	--	--	Photosystem I psaG / psaK	Photosystem I reaction center subunit psaK, chloroplastic (Precursor) GN=PSAK OS=Medicago sativa (Alfalfa) PE=2 SV=1	S	Function unknown	unknown [Medicago truncatula]
PsaO	F01_transcript/17041	1125	1265	1066	5958	6009	5570	147.48	153.36	142.97	818.77	843.3	882.26	0	2.50169	up	--	--	Cellular Component: integral component of membrane (GO:0016021);;	K14332|6.7366e-83|cam:101500027|K14332 photosystem I subunit PsaO | (RefSeq) photosystem I subunit O	ko00195:Photosynthesis	--	--	--	Photosystem I subunit O (Precursor) GN=PSAO OS=Arabidopsis thaliana (Mouse-ear cress) PE=1 SV=1	S	Function unknown	unknown [Medicago truncatula]
	F01_transcript/17186	1048	1236	1288	4965	5149	4878	127.78	139.21	160.55	634.75	672.49	718.23	1.32241e-117	2.22473	up	--	--	Cellular Component: integral component of membrane (GO:0016021);;	K14332|9.93093e-83|cam:101500027|K14332 photosystem I subunit PsaO | (RefSeq) photosystem I subunit O	ko00195:Photosynthesis	--	--	--	Photosystem I subunit O (Precursor) GN=PSAO OS=Arabidopsis thaliana (Mouse-ear cress) PE=1 SV=1	S	Function unknown	unknown [Medicago truncatula]
	F01_transcript/18132	976	974	1012	2624	2849	2465	136.16	125.85	144.61	383.66	425.17	415.58	1.40171e-84	1.57388	up	--	--	Cellular Component: integral component of membrane (GO:0016021);;	K14332|4.88722e-83|cam:101500027|K14332 photosystem I subunit PsaO | (RefSeq) photosystem I subunit O	ko00195:Photosynthesis	--	--	--	Photosystem I subunit O (Precursor) GN=PSAO OS=Arabidopsis thaliana (Mouse-ear cress) PE=1 SV=1	S	Function unknown	unknown [Medicago truncatula]
	F01_transcript/19747	2	1	0	19	18	24	0.54	0.25	0	5.26	4.97	7.6	5.28082e-11	4.52732	up	--	--	Cellular Component: integral component of membrane (GO:0016021);;	K14332|2.49667e-53|cam:101500027|K14332 photosystem I subunit PsaO | (RefSeq) photosystem I subunit O	ko00195:Photosynthesis	--	--	--	Photosystem I subunit O (Precursor) GN=PSAO OS=Arabidopsis thaliana (Mouse-ear cress) PE=1 SV=1	S	Function unknown	unknown [Medicago truncatula]
	F01_transcript/18286	12982	14694	12989	4883	4916	4531	1968.07	2066.18	2019.49	775.57	796.76	830.95	4.47125e-227	-1.34762	down	--	--	Cellular Component: integral component of membrane (GO:0016021);;	K14332|7.45777e-84|cam:101500027|K14332 photosystem I subunit PsaO | (RefSeq) photosystem I subunit O	ko00195:Photosynthesis	--	--	--	Photosystem I subunit O (Precursor) GN=PSAO OS=Arabidopsis thaliana (Mouse-ear cress) PE=1 SV=1	S	Function unknown	unknown [Medicago truncatula]
	F01_transcript/20853	134	130	147	1	3	7	92.17	88.67	104.82	0.72	2.24	6.12	5.61203e-40	-5.01241	down	--	--	Cellular Component: plastid (GO:0009536);; Cellular Component: integral component of membrane (GO:0016021);;	K14332|1.11484e-13|bdi:100840579|K14332 photosystem I subunit PsaO | (RefSeq) photosystem I subunit O	ko00195:Photosynthesis	--	--	--	Photosystem I subunit O (Precursor) GN=PSAO OS=Arabidopsis thaliana (Mouse-ear cress) PE=1 SV=1	S	Function unknown	unknown [Medicago truncatula]
C_L_vs_A_L (A4)
Component		T16_Count	T17_Count	T18_Count	T07_Count	T08_Count	T09_Count	T16_FPKM	T17_FPKM	T18_FPKM	T07_FPKM	T08_FPKM	T09_FPKM	FDR	log2FC	regulated	COG_class	COG_class_annotation	GO_annotation	KEGG_annotation	KEGG_pathway	KOG_class	KOG_class_annotation	Pfam_annotation	Swissprot_annotation	eggNOG_class	eggNOG_class_annotation	nr_annotation
PsbA	F01_transcript/14235	293	353	263	676	683	622	20.1	22.24	18.7	47.25	48.83	49.87	1.68675e-23	1.01934	up	--	--	Molecular Function: iron ion binding (GO:0005506);; Cellular Component: photosystem II (GO:0009523);; Cellular Component: chloroplast thylakoid membrane (GO:0009535);; Biological Process: response to herbicide (GO:0009635);; Biological Process: photosynthetic electron transport in photosystem II (GO:0009772);; Molecular Function: oxygen evolving activity (GO:0010242);; Cellular Component: integra…	K02703|6.08668e-143|mtr:MTR_7g021750|K02703 photosystem II P680 reaction center D1 protein [EC:1.10.3.9] | (RefSeq) photosystem II Q(B) protein	ko00195:Photosynthesis	--	--	Photosynthetic reaction centre protein	Photosystem II protein D1 {ECO:0000255|HAMAP-Rule:MF_01379} (Precursor) OS=Medicago sativa (Alfalfa) PE=3 SV=1	C	Energy production and conversion	photosystem II protein D1 (chloroplast) [Macadamia integrifolia]
PsbB	F01_transcript/2102	227	303	192	610	666	573	4.71	5.87	4.18	13.15	14.71	14.09	3.72105e-26	1.25623	up	[C]	Energy production and conversion	Cellular Component: photosystem II (GO:0009523);; Cellular Component: chloroplast thylakoid membrane (GO:0009535);; Biological Process: photosynthetic electron transport in photosystem II (GO:0009772);; Cellular Component: integral component of membrane (GO:0016021);; Molecular Function: chlorophyll binding (GO:0016168);; Biological Process: protein-chromophore linkage (GO:0018298);; Molecular Fu…	K02704|0|mtr:MTR_4g051370|K02704 photosystem II CP47 chlorophyll apoprotein | (RefSeq) photosystem II CP47 chlorophyll A apoprotein	ko00195:Photosynthesis	--	--	Photosystem II protein;; Cytochrome b/b6/petB;; Cytochrome b(N-terminal)/b6/petB;; Photosystem II 10 kDa phosphoprotein	Photosystem II CP47 reaction center protein {ECO:0000255|HAMAP-Rule:MF_01495} OS=Cicer arietinum (Chickpea) PE=3 SV=1	S	Function unknown	Photosystem II CP47 chlorophyll apoprotein [Medicago truncatula]
PetB	F01_transcript/413	35	37	31	93	92	64	0.54	0.53	0.49	1.47	1.48	1.15	0.000111986	1.15493	up	[C]	Energy production and conversion	Molecular Function: iron ion binding (GO:0005506);; Cellular Component: chloroplast thylakoid membrane (GO:0009535);; Biological Process: photosynthesis (GO:0015979);; Cellular Component: integral component of membrane (GO:0016021);; Molecular Function: oxidoreductase activity (GO:0016491);; Molecular Function: heme binding (GO:0020037);; Biological Process: respiratory electron transport chain (…	K02635|3.69234e-141|cmo:103504414|K02635 cytochrome b6 | (RefSeq) cytochrome b6	ko00195:Photosynthesis	[C]	Energy production and conversion	Cytochrome b/b6/petB;; Cytochrome b(N-terminal)/b6/petB;; Photosystem II protein;; Cytochrome b(C-terminal)/b6/petD;; Photosystem II 10 kDa phosphoprotein	Cytochrome b6 {ECO:0000255|HAMAP-Rule:MF_00633} OS=Oenothera elata subsp. hookeri (Hooker&apos;s evening primrose) PE=3 SV=2	C	Energy production and conversion	PREDICTED: LOW QUALITY PROTEIN: cytochrome b6, partial [Cucumis melo]
PsbO	F01_transcript/14445	1717	1810	1459	853	803	745	138.01	133.25	121.39	69.73	67.15	69.84	2.07972e-51	-1.1624	down	--	--	Molecular Function: calcium ion binding (GO:0005509);; Cellular Component: chloroplast thylakoid membrane (GO:0009535);; Cellular Component: photosystem II oxygen evolving complex (GO:0009654);; Cellular Component: integral component of membrane (GO:0016021);; Cellular Component: extrinsic component of membrane (GO:0019898);; Biological Process: photosystem II stabilization (GO:0042549);;	K02716|0|mtr:MTR_5g018670|K02716 photosystem II oxygen-evolving enhancer protein 1 | (RefSeq) photosystem II oxygen-evolving enhancer protein	ko00195:Photosynthesis	--	--	Manganese-stabilising protein / photosystem II polypeptide	Oxygen-evolving enhancer protein 1, chloroplastic (Precursor) GN=PSBO OS=Pisum sativum (Garden pea) PE=2 SV=1	G	Carbohydrate transport and metabolism	Oxygen evolving enhancer protein [Medicago truncatula]
PsbP	F01_transcript/16393	395	437	337	1474	1595	1215	41.14	41.32	36.04	154.37	170.77	146.35	4.17913e-51	1.76282	up	--	--	Molecular Function: calcium ion binding (GO:0005509);; Cellular Component: chloroplast (GO:0009507);; Cellular Component: photosystem II oxygen evolving complex (GO:0009654);; Biological Process: photosynthesis (GO:0015979);; Cellular Component: extrinsic component of membrane (GO:0019898);; Cellular Component: thylakoid lumen (GO:0031977);;	K02717|3.1502e-140|cam:101510219|K02717 photosystem II oxygen-evolving enhancer protein 2 | (RefSeq) psbP-like protein 1, chloroplastic	ko00195:Photosynthesis	--	--	PsbP	PsbP-like protein 1, chloroplastic (Precursor) GN=PPL1 OS=Arabidopsis thaliana (Mouse-ear cress) PE=1 SV=1	G	Carbohydrate transport and metabolism	oxygen-evolving complex/thylakoid lumenal 25.6 kDa protein [Medicago truncatula]
	F01_transcript/15420	7971	7756	7382	402	332	369	681.7	606.57	652.4	34.94	29.46	36.82	0	-4.49766	down	--	--	Molecular Function: calcium ion binding (GO:0005509);; Cellular Component: chloroplast thylakoid membrane (GO:0009535);; Cellular Component: photosystem II oxygen evolving complex (GO:0009654);; Biological Process: photosynthesis (GO:0015979);; Cellular Component: extrinsic component of membrane (GO:0019898);;	K02717|1.90406e-150|cam:101514916|K02717 photosystem II oxygen-evolving enhancer protein 2 | (RefSeq) oxygen-evolving enhancer protein 2, chloroplastic	ko00195:Photosynthesis	--	--	PsbP	Oxygen-evolving enhancer protein 2, chloroplastic (Precursor) GN=PSBP OS=Pisum sativum (Garden pea) PE=1 SV=1	S	Function unknown	unknown [Medicago truncatula]
	F01_transcript/21099	785	990	811	323	362	284	800.75	791.04	755.64	275.01	321.05	300.84	1.89698e-39	-1.5259	down	--	--	Molecular Function: calcium ion binding (GO:0005509);; Cellular Component: chloroplast thylakoid membrane (GO:0009535);; Cellular Component: photosystem II oxygen evolving complex (GO:0009654);; Biological Process: photosynthesis (GO:0015979);; Cellular Component: extrinsic component of membrane (GO:0019898);;	K02717|2.83282e-44|cam:101514916|K02717 photosystem II oxygen-evolving enhancer protein 2 | (RefSeq) oxygen-evolving enhancer protein 2, chloroplastic	ko00195:Photosynthesis	--	--	--	Oxygen-evolving enhancer protein 2, chloroplastic (Precursor) GN=PSBP OS=Pisum sativum (Garden pea) PE=1 SV=1	S	Function unknown	oxygen-evolving enhancer protein 2-1 [Medicago truncatula]
PsbQ	F01_transcript/16936	1194	1294	1224	3094	3170	2791	140.21	137.28	147.12	363.67	380.75	377.53	8.06473e-82	1.17487	up	--	--	Molecular Function: calcium ion binding (GO:0005509);; Cellular Component: nitrite reductase complex [NAD(P)H] (GO:0009344);; Cellular Component: chloroplast thylakoid membrane (GO:0009535);; Cellular Component: photosystem II oxygen evolving complex (GO:0009654);; Biological Process: photosynthetic electron transport chain (GO:0009767);; Cellular Component: extrinsic component of membrane (GO:00…	K08901|4.20606e-167|mtr:MTR_2g082580|K08901 photosystem II oxygen-evolving enhancer protein 3 | (RefSeq) oxygen-evolving enhancer protein	ko00195:Photosynthesis	--	--	Oxygen evolving enhancer protein 3 (PsbQ)	PsbQ-like protein 2, chloroplastic (Precursor) GN=T13O15.8 OS=Arabidopsis thaliana (Mouse-ear cress) PE=1 SV=1	S	Function unknown	Oxygen-evolving enhancer protein 3-1 [Medicago truncatula]
	F01_transcript/17015	531	538	493	1248	1247	1074	60.63	55.63	57.66	142.85	145.91	141.47	1.32398e-42	1.07951	up	--	--	Molecular Function: calcium ion binding (GO:0005509);; Cellular Component: photosystem II oxygen evolving complex (GO:0009654);; Biological Process: photosynthesis (GO:0015979);; Cellular Component: extrinsic component of membrane (GO:0019898);;	K08901|1.42034e-110|mtr:MTR_5g041910|K08901 photosystem II oxygen-evolving enhancer protein 3 | (RefSeq) oxygen-evolving enhancer protein	ko00195:Photosynthesis	--	--	Oxygen evolving enhancer protein 3 (PsbQ)	PsbQ-like protein 1, chloroplastic (Precursor) GN=F7A19.23 OS=Arabidopsis thaliana (Mouse-ear cress) PE=1 SV=1	S	Function unknown	Oxygen-evolving enhancer protein 3-2 [Medicago truncatula]
	F01_transcript/21133	27	54	29	109	88	95	24.73	39.18	24.41	83.63	70.13	89.74	3.88747e-06	1.31524	up	--	--	Molecular Function: calcium ion binding (GO:0005509);; Cellular Component: photosystem II oxygen evolving complex (GO:0009654);; Biological Process: photosynthesis (GO:0015979);; Cellular Component: extrinsic component of membrane (GO:0019898);;	K08901|2.82281e-34|cam:101495316|K08901 photosystem II oxygen-evolving enhancer protein 3 | (RefSeq) oxygen-evolving enhancer protein 3, chloroplastic-like	ko00195:Photosynthesis	--	--	Oxygen evolving enhancer protein 3 (PsbQ)	Oxygen-evolving enhancer protein 3, chloroplastic (Precursor) GN=PSBQ OS=Onobrychis viciifolia (Common sainfoin) PE=2 SV=1	S	Function unknown	unknown [Medicago truncatula]
PsbR	F01_transcript/17125	13899	16038	13653	41305	43714	38061	1786.74	1855.09	1790.79	5290.82	5719.92	5615.35	7.71925e-129	1.38907	up	--	--	Cellular Component: photosystem II oxygen evolving complex (GO:0009654);; Biological Process: photosynthesis (GO:0015979);; Cellular Component: integral component of membrane (GO:0016021);;	K03541|1.38076e-71|mtr:MTR_2g064650|K03541 photosystem II 10kDa protein | (RefSeq) photosystem II 10 kDa proteinPsbR protein	ko00195:Photosynthesis	--	--	Photosystem II 10 kDa polypeptide PsbR	Photosystem II 10 kDa polypeptide, chloroplastic (Precursor) GN=PSBR OS=Solanum tuberosum (Potato) PE=2 SV=1	S	Function unknown	Photosystem II 10 kDa polypeptide [Medicago truncatula]
	F01_transcript/18244	71	88	40	296	293	349	14.32	15.56	8	57.4	58.05	78.33	6.5944e-14	2.15344	up	--	--	Cellular Component: photosystem II oxygen evolving complex (GO:0009654);; Biological Process: photosynthesis (GO:0015979);; Cellular Component: integral component of membrane (GO:0016021);;	K03541|1.65183e-70|mtr:MTR_2g064650|K03541 photosystem II 10kDa protein | (RefSeq) photosystem II 10 kDa proteinPsbR protein	ko00195:Photosynthesis	--	--	Photosystem II 10 kDa polypeptide PsbR	Photosystem II 10 kDa polypeptide, chloroplastic (Precursor) GN=PSBR OS=Solanum tuberosum (Potato) PE=2 SV=1	S	Function unknown	Photosystem II 10 kDa polypeptide [Medicago truncatula]
PsbS	F01_transcript/14964	557	599	449	2842	2897	2715	42.84	42.28	35.83	222.52	232.06	243.91	2.56486e-194	2.29321	up	--	--	Cellular Component: integral component of membrane (GO:0016021);;	K03542|1.02465e-135|mtr:MTR_3g088040|K03542 photosystem II 22kDa protein | (RefSeq) light-harvesting complex I chlorophyll A/B-binding protein	ko00195:Photosynthesis	--	--	Chlorophyll A-B binding protein	Photosystem II 22 kDa protein, chloroplastic (Precursor) GN=PSBS OS=Spinacia oleracea (Spinach) PE=1 SV=1	I	Lipid transport and metabolism	Photosystem II 22 kDa protein [Medicago truncatula]
	F01_transcript/14917	17314	19308	15813	8637	8981	8470	1440.44	1470.03	1360.28	729.5	775.98	821.18	3.97483e-70	-1.11209	down	--	--	Cellular Component: integral component of membrane (GO:0016021);;	K03542|4.94863e-136|mtr:MTR_3g088040|K03542 photosystem II 22kDa protein | (RefSeq) light-harvesting complex I chlorophyll A/B-binding protein	ko00195:Photosynthesis	--	--	Chlorophyll A-B binding protein	Photosystem II 22 kDa protein, chloroplastic (Precursor) GN=PSBS OS=Spinacia oleracea (Spinach) PE=1 SV=1	I	Lipid transport and metabolism	Photosystem II 22 kDa protein [Medicago truncatula]
PsbW	F01_transcript/20233	513	618	449	1641	1817	1610	220.59	220.02	184.15	638.68	720.22	739.91	3.86664e-51	1.57886	up	--	--	Cellular Component: chloroplast (GO:0009507);; Cellular Component: photosystem II (GO:0009523);; Biological Process: photosynthesis (GO:0015979);; Cellular Component: integral component of membrane (GO:0016021);;	K02721|8.1388e-35|cam:101513777|K02721 photosystem II PsbW protein | (RefSeq) photosystem II reaction center W protein, chloroplastic-like	ko00195:Photosynthesis	--	--	Photosystem II reaction centre W protein (PsbW)	Photosystem II reaction center W protein, chloroplastic (Precursor) GN=psbW OS=Spinacia oleracea (Spinach) PE=1 SV=1	S	Function unknown	photosystem II reaction center W [Medicago truncatula]
	F01_transcript/19414	3	2	0	2760	2783	2605	0.76	0.44	0	652.38	670.07	715.79	0	10.5871	up	--	--	Cellular Component: photosystem II (GO:0009523);; Biological Process: photosynthesis (GO:0015979);; Cellular Component: integral component of membrane (GO:0016021);; Molecular Function: manganese ion binding (GO:0030145);;	K02723|8.02518e-79|mtr:MTR_3g086230|K02723 photosystem II PsbY protein | (RefSeq) photosystem II core complex family psbY protein	ko00195:Photosynthesis	--	--	Photosystem II protein Y (PsbY)	Photosystem II protein psbY-2, chloroplastic (Precursor) GN=PSBY OS=Spinacia oleracea (Spinach) PE=1 SV=2	I	Lipid transport and metabolism	unknown [Medicago truncatula]
PetE	F01_transcript/16910	179	315	222	652	692	491	20.94	33.26	26.61	76.32	82.67	66.11	6.95612e-11	1.24815	up	[C]	Energy production and conversion	Molecular Function: copper ion binding (GO:0005507);; Molecular Function: electron carrier activity (GO:0009055);; Cellular Component: chloroplast thylakoid membrane (GO:0009535);; Cellular Component: integral component of membrane (GO:0016021);; Biological Process: oxidation-reduction process (GO:0055114);;	K02638|2.67661e-93|mtr:MTR_3g114850|K02638 plastocyanin | (RefSeq) plastocyanin	ko00195:Photosynthesis	--	--	Copper binding proteins, plastocyanin/azurin family;; Cupredoxin-like domain	Plastocyanin, chloroplastic (Precursor) GN=PETE OS=Pisum sativum (Garden pea) PE=4 SV=1	C	Energy production and conversion	Plastocyanin [Medicago truncatula]
PetF	F01_transcript/15566	154	210	145	1057	986	816	13.46	16.7	13.09	93.2	88.99	82.67	9.10978e-117	2.38179	up	[C]	Energy production and conversion	Molecular Function: electron carrier activity (GO:0009055);; Cellular Component: chloroplast (GO:0009507);; Biological Process: electron transport chain (GO:0022900);; Molecular Function: metal ion binding (GO:0046872);; Molecular Function: 2 iron, 2 sulfur cluster binding (GO:0051537);;	K02639|3.4633e-124|mtr:MTR_4g098490|K02639 ferredoxin | (RefSeq) 2Fe-2S ferredoxin superfamily protein	ko00195:Photosynthesis	--	--	2Fe-2S iron-sulfur cluster binding domain	Ferredoxin-A OS=Alocasia macrorrhizos (Giant taro) PE=1 SV=1	C	Energy production and conversion	Ferredoxin-6 [Medicago truncatula]
	F01_transcript/16645	298	288	264	735	774	745	32.92	28.85	29.94	81.56	87.75	95	4.022e-39	1.3	up	[C]	Energy production and conversion	Molecular Function: electron carrier activity (GO:0009055);; Cellular Component: chloroplast (GO:0009507);; Biological Process: electron transport chain (GO:0022900);; Molecular Function: metal ion binding (GO:0046872);; Molecular Function: 2 iron, 2 sulfur cluster binding (GO:0051537);;	K02639|1.07578e-124|mtr:MTR_4g098490|K02639 ferredoxin | (RefSeq) 2Fe-2S ferredoxin superfamily protein	ko00195:Photosynthesis	--	--	2Fe-2S iron-sulfur cluster binding domain	Ferredoxin-A OS=Alocasia macrorrhizos (Giant taro) PE=1 SV=1	C	Energy production and conversion	Ferredoxin-6 [Medicago truncatula]
	F01_transcript/17777	125	141	107	365	346	357	18	18.17	15.65	52.05	50.38	58.7	1.41804e-22	1.41569	up	[C]	Energy production and conversion	Molecular Function: electron carrier activity (GO:0009055);; Cellular Component: chloroplast (GO:0009507);; Biological Process: electron transport chain (GO:0022900);; Molecular Function: metal ion binding (GO:0046872);; Molecular Function: 2 iron, 2 sulfur cluster binding (GO:0051537);;	K02639|4.16313e-98|mtr:MTR_5g006320|K02639 ferredoxin | (RefSeq) 2Fe-2S ferredoxin superfamily protein	ko00195:Photosynthesis	--	--	2Fe-2S iron-sulfur cluster binding domain	Ferredoxin-3, chloroplastic (Precursor) GN=FD3 OS=Arabidopsis thaliana (Mouse-ear cress) PE=1 SV=1	C	Energy production and conversion	Ferredoxin [Medicago truncatula]
	F01_transcript/17846	604	715	585	2184	2054	1878	87.94	92.99	86.46	314.3	301.81	311.74	4.38722e-113	1.57492	up	[C]	Energy production and conversion	Molecular Function: electron carrier activity (GO:0009055);; Biological Process: electron transport chain (GO:0022900);; Molecular Function: metal ion binding (GO:0046872);; Molecular Function: 2 iron, 2 sulfur cluster binding (GO:0051537);;	K02639|3.7709e-97|mtr:MTR_8g088720|K02639 ferredoxin | (RefSeq) 2Fe-2S ferredoxin superfamily protein	ko00195:Photosynthesis	--	--	2Fe-2S iron-sulfur cluster binding domain	Ferredoxin-1, chloroplastic (Precursor) GN=SEND33 OS=Solanum lycopersicum (Tomato) PE=2 SV=1	C	Energy production and conversion	Ferredoxin I [Medicago truncatula]
	F01_transcript/16064	1122	1018	1088	200	220	242	107.4	88.79	107.37	19.35	21.82	26.9	1.28326e-57	-2.38977	down	[C]	Energy production and conversion	Molecular Function: electron carrier activity (GO:0009055);; Cellular Component: chloroplast (GO:0009507);; Biological Process: electron transport chain (GO:0022900);; Molecular Function: metal ion binding (GO:0046872);; Molecular Function: 2 iron, 2 sulfur cluster binding (GO:0051537);;	K02639|4.11712e-124|mtr:MTR_4g098490|K02639 ferredoxin | (RefSeq) 2Fe-2S ferredoxin superfamily protein	ko00195:Photosynthesis	--	--	2Fe-2S iron-sulfur cluster binding domain	Ferredoxin-A OS=Alocasia macrorrhizos (Giant taro) PE=1 SV=1	C	Energy production and conversion	Ferredoxin-6 [Medicago truncatula]
	F01_transcript/18206	1888	2018	1697	787	733	783	336.12	317.44	303.89	136.83	130.09	157.4	1.77806e-92	-1.38634	down	[C]	Energy production and conversion	Molecular Function: electron carrier activity (GO:0009055);; Biological Process: electron transport chain (GO:0022900);; Molecular Function: metal ion binding (GO:0046872);; Molecular Function: 2 iron, 2 sulfur cluster binding (GO:0051537);;	K02639|1.428e-97|mtr:MTR_8g088720|K02639 ferredoxin | (RefSeq) 2Fe-2S ferredoxin superfamily protein	ko00195:Photosynthesis	--	--	2Fe-2S iron-sulfur cluster binding domain	Ferredoxin-1, chloroplastic (Precursor) GN=SEND33 OS=Solanum lycopersicum (Tomato) PE=2 SV=1	C	Energy production and conversion	Ferredoxin I [Medicago truncatula]
PetH	F01_transcript/13117	3067	3132	2873	85	103	45	162.73	153.82	159.06	4.67	5.77	2.84	0	-5.41412	down	[P]	Inorganic ion transport and metabolism	Molecular Function: nucleotide binding (GO:0000166);; Molecular Function: ferredoxin-NADP+ reductase activity (GO:0004324);; Molecular Function: protein binding (GO:0005515);; Molecular Function: poly(U) RNA binding (GO:0008266);; Cellular Component: chloroplast thylakoid membrane (GO:0009535);; Cellular Component: chloroplast stroma (GO:0009570);; Biological Process: photosynthetic electron tran…	K02641|0|mtr:MTR_5g022300|K02641 ferredoxin--NADP+ reductase [EC:1.18.1.2] | (RefSeq) leaf ferredoxin-NADP reductase	ko00195:Photosynthesis	[C]	Energy production and conversion	Oxidoreductase NAD-binding domain;; Oxidoreductase FAD-binding domain	Ferredoxin--NADP reductase, leaf isozyme, chloroplastic (Precursor) GN=PETH OS=Pisum sativum (Garden pea) PE=1 SV=1	P	Inorganic ion transport and metabolism	Ferredoxin-NADP reductase [Medicago truncatula]
PsbY	F01_transcript/19414	3	2	0	2760	2783	2605	0.76	0.44	0	652.38	670.07	715.79	0	10.5871	up	--	--	Cellular Component: photosystem II (GO:0009523);; Biological Process: photosynthesis (GO:0015979);; Cellular Component: integral component of membrane (GO:0016021);; Molecular Function: manganese ion binding (GO:0030145);;	K02723|8.02518e-79|mtr:MTR_3g086230|K02723 photosystem II PsbY protein | (RefSeq) photosystem II core complex family psbY protein	ko00195:Photosynthesis	--	--	Photosystem II protein Y (PsbY)	Photosystem II protein psbY-2, chloroplastic (Precursor) GN=PSBY OS=Spinacia oleracea (Spinach) PE=1 SV=2	I	Lipid transport and metabolism	unknown [Medicago truncatula]
PsaA	F01_transcript/333	194	118	363	994	1011	893	2.87	1.64	5.65	15.29	15.94	15.69	1.98179e-19	1.96177	up	[M]	Cell wall/membrane/envelope biogenesis	Molecular Function: magnesium ion binding (GO:0000287);; Molecular Function: electron carrier activity (GO:0009055);; Cellular Component: photosystem I (GO:0009522);; Cellular Component: chloroplast thylakoid membrane (GO:0009535);; Biological Process: photosynthesis (GO:0015979);; Cellular Component: integral component of membrane (GO:0016021);; Molecular Function: chlorophyll binding (GO:001616…	K02689|0|mtr:MetrCp066|K02689 photosystem I P700 chlorophyll a apoprotein A1 | (RefSeq) psaA; photosystem I P700 chlorophyll a apoprotein A1	ko00195:Photosynthesis	--	--	Photosystem I psaA/psaB protein;; Photosystem I psaA/psaB protein;; Photosystem I psaA/psaB protein;; Ribosomal protein S14p/S29e	Photosystem I P700 chlorophyll a apoprotein A1 {ECO:0000255|HAMAP-Rule:MF_00458} GN=CsCp034 OS=Cucumis sativus (Cucumber) PE=3 SV=1	C	Energy production and conversion	photosystem I P700 apoprotein A1 [Medicago truncatula]
PsaB	F01_transcript/5145	208	100	147	86	48	34	5.58	2.53	4.17	2.43	1.37	1.08	0.00439888	-1.58439	down	[M]	Cell wall/membrane/envelope biogenesis	Molecular Function: magnesium ion binding (GO:0000287);; Molecular Function: electron carrier activity (GO:0009055);; Cellular Component: photosystem I (GO:0009522);; Cellular Component: chloroplast thylakoid membrane (GO:0009535);; Biological Process: photosynthesis (GO:0015979);; Cellular Component: integral component of membrane (GO:0016021);; Molecular Function: chlorophyll binding (GO:001616…	K02690|0|mtr:MTR_3g035600|K02690 photosystem I P700 chlorophyll a apoprotein A2 | (RefSeq) photosystem I P700 chlorophyll A apoprotein A2	ko00195:Photosynthesis	--	--	Photosystem I psaA/psaB protein;; Ribosomal protein S14p/S29e;; Photosystem I psaA/psaB protein	Photosystem I P700 chlorophyll a apoprotein A2 {ECO:0000255|HAMAP-Rule:MF_00482} OS=Lotus japonicus (Lotus corniculatus var. japonicus) PE=3 SV=1	C	Energy production and conversion	photosystem I P700 chlorophyll A apoprotein A2 [Medicago truncatula]
PsaD	F01_transcript/20974	147	136	127	48	55	42	133.67	97.13	105.89	36.81	44.14	39.86	4.56677e-12	-1.61401	down	--	--	Cellular Component: chloroplast thylakoid membrane (GO:0009535);; Cellular Component: photosystem I reaction center (GO:0009538);; Biological Process: photosynthesis (GO:0015979);;	K02692|7.75912e-42|mtr:MTR_5g006130|K02692 photosystem I subunit II | (RefSeq) photosystem I reaction center subunit II	ko00195:Photosynthesis	--	--	PsaD	Photosystem I reaction center subunit II, chloroplastic (Precursor) GN=psaD OS=Cucumis sativus (Cucumber) PE=1 SV=1	C	Energy production and conversion	Photosystem I reaction center subunit II [Medicago truncatula]
PsaF	F01_transcript/15536	1660	1782	1352	4353	4084	3800	143.83	141.13	120.98	382.3	366.83	383.11	1.22253e-99	1.24528	up	--	--	Cellular Component: plastid (GO:0009536);; Cellular Component: photosystem I reaction center (GO:0009538);; Biological Process: photosynthesis (GO:0015979);; Cellular Component: integral component of membrane (GO:0016021);;	K02694|2.05773e-94|cam:101506661|K02694 photosystem I subunit III | (RefSeq) photosystem I reaction center subunit III, chloroplastic	ko00195:Photosynthesis	--	--	Photosystem I reaction centre subunit III	Photosystem I reaction center subunit III, chloroplastic (Precursor) GN=PSAF OS=Flaveria trinervia (Clustered yellowtops) PE=2 SV=1	S	Function unknown	unknown [Medicago truncatula]
	F01_transcript/16432	3180	3359	3521	12746	12484	11408	336.58	322.58	382.75	1356.68	1358.38	1396.13	4.02504e-226	1.75071	up	--	--	Cellular Component: plastid (GO:0009536);; Cellular Component: photosystem I reaction center (GO:0009538);; Biological Process: photosynthesis (GO:0015979);; Cellular Component: integral component of membrane (GO:0016021);;	K02694|5.22106e-127|cam:101506661|K02694 photosystem I subunit III | (RefSeq) photosystem I reaction center subunit III, chloroplastic	ko00195:Photosynthesis	--	--	Photosystem I reaction centre subunit III	Photosystem I reaction center subunit III, chloroplastic (Precursor) GN=PSAF OS=Arabidopsis thaliana (Mouse-ear cress) PE=1 SV=1	S	Function unknown	unknown [Medicago truncatula]
	F01_transcript/15408	18842	20717	19611	5109	4960	4598	1611.43	1620.04	1733.11	443.18	440.09	457.9	1.61649e-263	-2.12333	down	--	--	Cellular Component: plastid (GO:0009536);; Cellular Component: photosystem I reaction center (GO:0009538);; Biological Process: photosynthesis (GO:0015979);; Cellular Component: integral component of membrane (GO:0016021);;	K02694|2.18088e-126|cam:101506661|K02694 photosystem I subunit III | (RefSeq) photosystem I reaction center subunit III, chloroplastic	ko00195:Photosynthesis	--	--	Photosystem I reaction centre subunit III	Photosystem I reaction center subunit III, chloroplastic (Precursor) GN=PSAF OS=Arabidopsis thaliana (Mouse-ear cress) PE=1 SV=1	S	Function unknown	unknown [Medicago truncatula]
	F01_transcript/16057	6910	8444	9513	2606	2205	1836	655.24	729.59	929.49	249.72	216.1	202.1	5.52273e-14	-2.0267	down	--	--	Cellular Component: plastid (GO:0009536);; Cellular Component: photosystem I reaction center (GO:0009538);; Biological Process: photosynthesis (GO:0015979);; Cellular Component: integral component of membrane (GO:0016021);;	K02694|5.71879e-95|cam:101506661|K02694 photosystem I subunit III | (RefSeq) photosystem I reaction center subunit III, chloroplastic	ko00195:Photosynthesis	--	--	Photosystem I reaction centre subunit III	Photosystem I reaction center subunit III, chloroplastic (Precursor) GN=PSAF OS=Flaveria trinervia (Clustered yellowtops) PE=2 SV=1	S	Function unknown	unknown [Medicago truncatula]
PsaG	F01_transcript/19756	1226	1608	1622	626	746	632	330.84	372.12	430.03	159.69	193.88	187.75	5.10624e-10	-1.26334	down	--	--	Biological Process: photosynthetic electron transport in photosystem I (GO:0009773);; Biological Process: photosynthetic NADP+ reduction (GO:0009780);; Cellular Component: integral component of membrane (GO:0016021);; Molecular Function: chlorophyll binding (GO:0016168);; Cellular Component: chloroplast photosystem I (GO:0030093);; Cellular Component: chloroplast membrane (GO:0031969);; Biologica…	K08905|2.31372e-68|cam:101488425|K08905 photosystem I subunit V | (RefSeq) photosystem I reaction center subunit V, chloroplastic	ko00195:Photosynthesis	--	--	Photosystem I psaG / psaK	Photosystem I reaction center subunit V, chloroplastic (Precursor) OS=Arabidopsis thaliana (Mouse-ear cress) PE=2 SV=1	I	Lipid transport and metabolism	unknown [Medicago truncatula]
beta	F01_transcript/5015	13	8	29	46	61	31	0.37	0.22	0.85	1.33	1.82	1.04	0.00991068	1.30695	up	[C]	Energy production and conversion	Molecular Function: ATP binding (GO:0005524);; Cellular Component: plasma membrane (GO:0005886);; Cellular Component: chloroplast thylakoid membrane (GO:0009535);; Biological Process: ATP synthesis coupled proton transport (GO:0015986);; Biological Process: ATP hydrolysis coupled proton transport (GO:0015991);; Cellular Component: integral component of membrane (GO:0016021);; Cellular Component: …	K02112|0|mtr:MetrCp073|K02112 F-type H+-transporting ATPase subunit beta [EC:3.6.3.14] | (RefSeq) atpB; ATP synthase CF1 beta subunit	ko00190:Oxidative phosphorylation;ko00195:Photosynthesis	[C]	Energy production and conversion	ATP synthase alpha/beta family, nucleotide-binding domain;; ATP synthase alpha/beta family, beta-barrel domain;; ATPase family associated with various cellular activities (AAA);; ATP synthase, Delta/Epsilon chain, beta-sandwich domain;; ATP synthase, Delta/Epsilon chain, long alpha-helix domain	ATP synthase subunit beta, chloroplastic {ECO:0000255|HAMAP-Rule:MF_01347} OS=Medicago sativa (Alfalfa) PE=3 SV=1	C	Energy production and conversion	RecName: Full=ATP synthase subunit beta, chloroplastic; AltName: Full=ATP synthase F1 sector subunit beta; AltName: Full=F-ATPase subunit beta (chloroplast) [Medicago sativa]
alpha	F01_transcript/1971	76	72	79	163	199	150	1.55	1.38	1.7	3.47	4.34	3.64	1.41586e-07	1.05629	up	[C]	Energy production and conversion	Molecular Function: ATP binding (GO:0005524);; Cellular Component: plasma membrane (GO:0005886);; Cellular Component: chloroplast thylakoid membrane (GO:0009535);; Biological Process: ATP synthesis coupled proton transport (GO:0015986);; Biological Process: ATP hydrolysis coupled proton transport (GO:0015991);; Cellular Component: proton-transporting ATP synthase complex, catalytic core F(1) (GO:…	K02111|0|cam:6797510|K02111 F-type H+-transporting ATPase subunit alpha [EC:3.6.3.14] | (RefSeq) atpA, CiarC_p026; ATP synthase CF1 alpha subunit	ko00190:Oxidative phosphorylation;ko00195:Photosynthesis	[C]	Energy production and conversion	ATP synthase alpha/beta family, nucleotide-binding domain;; ATP synthase alpha/beta chain, C terminal domain;; ATP synthase alpha/beta family, beta-barrel domain	ATP synthase subunit alpha, chloroplastic {ECO:0000255|HAMAP-Rule:MF_01346} OS=Lotus japonicus (Lotus corniculatus var. japonicus) PE=3 SV=1	C	Energy production and conversion	ATP synthase CF1 alpha subunit (chloroplast) [Medicago truncatula f. tricycla]
PsaK	F01_transcript/19016	391	420	231	168	115	141	89.91	83.98	52.76	37.18	25.95	36.06	3.1847e-05	-1.39517	down	--	--	Cellular Component: photosystem I (GO:0009522);; Cellular Component: chloroplast thylakoid membrane (GO:0009535);; Biological Process: photosynthesis (GO:0015979);; Cellular Component: integral component of membrane (GO:0016021);; Molecular Function: chlorophyll binding (GO:0016168);;	K02698|9.65271e-67|cam:101506632|K02698 photosystem I subunit X | (RefSeq) photosystem I reaction center subunit psaK, chloroplastic	ko00195:Photosynthesis	--	--	Photosystem I psaG / psaK	Photosystem I reaction center subunit psaK, chloroplastic (Precursor) GN=PSAK OS=Medicago sativa (Alfalfa) PE=2 SV=1	S	Function unknown	RecName: Full=Photosystem I reaction center subunit psaK, chloroplastic; AltName: Full=PSI-K; AltName: Full=Photosystem I subunit X; Flags: Precursor [Medicago sativa]
	F01_transcript/19199	1148	1399	1008	475	460	464	268.98	284.28	234.09	106.61	105.05	120.77	3.14228e-23	-1.44618	down	--	--	Cellular Component: photosystem I (GO:0009522);; Cellular Component: chloroplast thylakoid membrane (GO:0009535);; Biological Process: photosynthesis (GO:0015979);; Cellular Component: integral component of membrane (GO:0016021);; Molecular Function: chlorophyll binding (GO:0016168);;	K02698|2.62177e-69|cam:101506632|K02698 photosystem I subunit X | (RefSeq) photosystem I reaction center subunit psaK, chloroplastic	ko00195:Photosynthesis	--	--	Photosystem I psaG / psaK	Photosystem I reaction center subunit psaK, chloroplastic (Precursor) GN=PSAK OS=Medicago sativa (Alfalfa) PE=2 SV=1	S	Function unknown	unknown [Medicago truncatula]
PsaL	F01_transcript/17661	427	537	367	3837	4090	3879	60.34	67.91	52.63	536.51	584.01	625.19	3.01578e-126	3.04968	up	--	--	Molecular Function: protein binding (GO:0005515);; Cellular Component: chloroplast thylakoid membrane (GO:0009535);; Cellular Component: photosystem I reaction center (GO:0009538);; Cellular Component: plastoglobule (GO:0010287);; Cellular Component: integral component of membrane (GO:0016021);; Biological Process: photosynthesis, light reaction (GO:0019684);; Cellular Component: chloroplast memb…	K02699|3.60832e-97|mtr:MTR_7g079900|K02699 photosystem I subunit XI | (RefSeq) photosystem I reaction center subunit XI	ko00195:Photosynthesis	--	--	Photosystem I reaction centre subunit XI	Photosystem I reaction center subunit XI, chloroplastic (Precursor) GN=PSAL OS=Arabidopsis thaliana (Mouse-ear cress) PE=1 SV=2	C	Energy production and conversion	Photosystem I reaction center subunit XI [Medicago truncatula]
	F01_transcript/19553	315	410	282	936	950	912	80.78	90.56	71.48	227.92	235.77	258.43	5.80932e-42	1.3743	up	--	--	Molecular Function: protein binding (GO:0005515);; Cellular Component: chloroplast thylakoid membrane (GO:0009535);; Cellular Component: photosystem I reaction center (GO:0009538);; Cellular Component: plastoglobule (GO:0010287);; Cellular Component: integral component of membrane (GO:0016021);; Biological Process: photosynthesis, light reaction (GO:0019684);; Cellular Component: chloroplast memb…	K02699|2.12022e-40|mtr:MTR_7g079900|K02699 photosystem I subunit XI | (RefSeq) photosystem I reaction center subunit XI	ko00195:Photosynthesis	--	--	Photosystem I reaction centre subunit XI	Photosystem I reaction center subunit XI, chloroplastic (Precursor) GN=PSAL OS=Arabidopsis thaliana (Mouse-ear cress) PE=1 SV=2	C	Energy production and conversion	photosystem I subunit XI Mrna (chloroplast) [Solanum tuberosum]
	F01_transcript/16196	7544	7399	6020	2923	3152	3043	769.11	685.45	631.07	300.19	330.95	359.26	3.35887e-28	-1.30448	down	--	--	Cellular Component: plastid (GO:0009536);; Cellular Component: photosystem I reaction center (GO:0009538);; Biological Process: photosynthesis (GO:0015979);; Cellular Component: integral component of membrane (GO:0016021);;	K02699|2.52026e-125|mtr:MTR_7g079900|K02699 photosystem I subunit XI | (RefSeq) photosystem I reaction center subunit XI	ko00195:Photosynthesis	--	--	Photosystem I reaction centre subunit XI	Photosystem I reaction center subunit XI, chloroplastic (Precursor) GN=PSAL OS=Arabidopsis thaliana (Mouse-ear cress) PE=1 SV=2	C	Energy production and conversion	Photosystem I reaction center subunit XI [Medicago truncatula]
PsaN	F01_transcript/17947	922	1153	896	4749	4579	4296	140.73	157	138.7	715.4	704.03	746.68	5.46421e-256	2.09168	up	--	--	Cellular Component: photosystem I (GO:0009522);; Biological Process: photosynthesis (GO:0015979);;	K02701|4.45848e-101|mtr:MTR_3g095540|K02701 photosystem I subunit PsaN | (RefSeq) photosystem I reaction center subunit N	ko00195:Photosynthesis	--	--	Photosystem I reaction centre subunit N (PSAN or PSI-N)	Photosystem I reaction center subunit N, chloroplastic (Precursor) GN=PSAN OS=Arabidopsis thaliana (Mouse-ear cress) PE=1 SV=2	S	Function unknown	Photosystem I reaction center subunit N [Medicago truncatula]
PsaO	F01_transcript/17041	2695	2750	2049	5958	6009	5570	373.19	341.37	288.74	818.77	843.3	882.26	4.14913e-48	1.12189	up	--	--	Cellular Component: integral component of membrane (GO:0016021);;	K14332|6.7366e-83|cam:101500027|K14332 photosystem I subunit PsaO | (RefSeq) photosystem I subunit O	ko00195:Photosynthesis	--	--	--	Photosystem I subunit O (Precursor) GN=PSAO OS=Arabidopsis thaliana (Mouse-ear cress) PE=1 SV=1	S	Function unknown	unknown [Medicago truncatula]
	F01_transcript/17186	2441	2490	1909	4965	5149	4878	313.17	287.51	249.96	634.75	672.49	718.23	3.40964e-29	1.02841	up	--	--	Cellular Component: integral component of membrane (GO:0016021);;	K14332|9.93093e-83|cam:101500027|K14332 photosystem I subunit PsaO | (RefSeq) photosystem I subunit O	ko00195:Photosynthesis	--	--	--	Photosystem I subunit O (Precursor) GN=PSAO OS=Arabidopsis thaliana (Mouse-ear cress) PE=1 SV=1	S	Function unknown	unknown [Medicago truncatula]
	F01_transcript/18132	781	953	719	2624	2849	2465	115.59	125.92	107.86	383.66	425.17	415.58	1.34611e-78	1.58932	up	--	--	Cellular Component: integral component of membrane (GO:0016021);;	K14332|4.88722e-83|cam:101500027|K14332 photosystem I subunit PsaO | (RefSeq) photosystem I subunit O	ko00195:Photosynthesis	--	--	--	Photosystem I subunit O (Precursor) GN=PSAO OS=Arabidopsis thaliana (Mouse-ear cress) PE=1 SV=1	S	Function unknown	unknown [Medicago truncatula]
	F01_transcript/19162	12	12	2	570	610	555	2.85	2.43	0.47	126.03	137.36	142.52	5.07514e-190	5.97785	up	--	--	Cellular Component: integral component of membrane (GO:0016021);;	K14332|1.82462e-84|cam:101500027|K14332 photosystem I subunit PsaO | (RefSeq) photosystem I subunit O	ko00195:Photosynthesis	--	--	--	Photosystem I subunit O (Precursor) GN=PSAO OS=Arabidopsis thaliana (Mouse-ear cress) PE=1 SV=1	S	Function unknown	unknown [Medicago truncatula]
	F01_transcript/21357	5	1	3	76	74	55	7.68	1.18	4.16	94.32	97.34	88.21	1.32473e-18	4.36927	up	--	--	--	K14332|6.59774e-07|bdi:100840579|K14332 photosystem I subunit PsaO | (RefSeq) photosystem I subunit O	ko00195:Photosynthesis	--	--	--	Photosystem I subunit O (Precursor) GN=PSAO OS=Arabidopsis thaliana (Mouse-ear cress) PE=1 SV=1	S	Function unknown	unknown [Medicago truncatula]
	F01_transcript/18286	10249	10987	9082	4883	4916	4531	1655.42	1577.41	1482.47	775.57	796.76	830.95	1.92374e-97	-1.18824	down	--	--	Cellular Component: integral component of membrane (GO:0016021);;	K14332|7.45777e-84|cam:101500027|K14332 photosystem I subunit PsaO | (RefSeq) photosystem I subunit O	ko00195:Photosynthesis	--	--	--	Photosystem I subunit O (Precursor) GN=PSAO OS=Arabidopsis thaliana (Mouse-ear cress) PE=1 SV=1	S	Function unknown	unknown [Medicago truncatula]
	F01_transcript/19747	50	53	33	19	18	24	14.1	12.93	9.39	5.26	4.97	7.6	0.0014024	-1.24385	down	--	--	Cellular Component: integral component of membrane (GO:0016021);;	K14332|2.49667e-53|cam:101500027|K14332 photosystem I subunit PsaO | (RefSeq) photosystem I subunit O	ko00195:Photosynthesis	--	--	--	Photosystem I subunit O (Precursor) GN=PSAO OS=Arabidopsis thaliana (Mouse-ear cress) PE=1 SV=1	S	Function unknown	unknown [Medicago truncatula]
	F01_transcript/20853	184	248	203	1	3	7	148.27	158.38	150.6	0.72	2.24	6.12	6.40712e-77	-5.8957	down	--	--	Cellular Component: plastid (GO:0009536);; Cellular Component: integral component of membrane (GO:0016021);;	K14332|1.11484e-13|bdi:100840579|K14332 photosystem I subunit PsaO | (RefSeq) photosystem I subunit O	ko00195:Photosynthesis	--	--	--	Photosystem I subunit O (Precursor) GN=PSAO OS=Arabidopsis thaliana (Mouse-ear cress) PE=1 SV=1	S	Function unknown	unknown [Medicago truncatula]

## Sheet: Table S9
Table S9†. The DEGs of antioxidant activities in response to graphene treatment.
C1_group	T01_Count	T02_Count	T03_Count	T04_Count	T05_Count	T06_Count	T01_FPKM	T02_FPKM	T03_FPKM	T04_FPKM	T05_FPKM	T06_FPKM	FDR	log2FC	regulated	COG_class	COG_class_annotation	GO_annotation	KEGG_annotation	KEGG_pathway	KOG_class	KOG_class_annotation	Pfam_annotation	Swissprot_annotation	eggNOG_class	eggNOG_class_annotation	nr_annotation
F01_transcript/14234	146	173	163	62	101	73	10.13	11.97	11.16	3.6	7.17	5.18	1.43e-06	-1.12966	down	[P]	Inorganic ion transport and metabolism	Molecular Function: superoxide dismutase activity (GO:0004784);; Molecular Function: copper ion binding (GO:0005507);; Cellular Component: mitochondrion (GO:0005739);; Cellular Component: plasma membrane (GO:0005886);; Cellular Component: chloroplast stroma (GO:0009570);; Cellular Component: thylakoid (GO:0009579);; Cellular Component: chloroplast envelope (GO:0009941);; Biological Process: remov…	K04564|8.11649e-158|cam:101494104|K04564 superoxide dismutase, Fe-Mn family [EC:1.15.1.1] | (RefSeq) superoxide dismutase [Fe], chloroplastic	ko04146:Peroxisome	[P]	Inorganic ion transport and metabolism	Iron/manganese superoxide dismutases, C-terminal domain;; Iron/manganese superoxide dismutases, alpha-hairpin domain	Superoxide dismutase [Fe], chloroplastic (Precursor) GN=SODB OS=Glycine max (Soybean) PE=1 SV=1	P	Inorganic ion transport and metabolism	Fe-superoxide dismutase precursor [Medicago sativa]
F01_transcript/15757	1031	1287	1122	519	444	359	95.99	119.41	103.29	40.46	42.82	34.58	5.65e-54	-1.5082	down	[P]	Inorganic ion transport and metabolism	Molecular Function: superoxide dismutase activity (GO:0004784);; Cellular Component: mitochondrial matrix (GO:0005759);; Biological Process: removal of superoxide radicals (GO:0019430);; Molecular Function: metal ion binding (GO:0046872);; Biological Process: oxidation-reduction process (GO:0055114);;	K04564|4.3164e-144|cam:101514373|K04564 superoxide dismutase, Fe-Mn family [EC:1.15.1.1] | (RefSeq) superoxide dismutase [Mn], mitochondrial	ko04146:Peroxisome	[P]	Inorganic ion transport and metabolism	Iron/manganese superoxide dismutases, C-terminal domain;; Iron/manganese superoxide dismutases, alpha-hairpin domain	Superoxide dismutase [Mn], mitochondrial (Precursor) GN=SODA OS=Pisum sativum (Garden pea) PE=2 SV=2	P	Inorganic ion transport and metabolism	unknown [Medicago truncatula]
F01_transcript/14585	288	311	310	152	84	130	21.47	23.13	22.86	9.47	6.44	9.96	1.48e-16	-1.44599	down	[P]	Inorganic ion transport and metabolism	Molecular Function: superoxide dismutase activity (GO:0004784);; Molecular Function: zinc ion binding (GO:0008270);; Cellular Component: chloroplast stroma (GO:0009570);; Molecular Function: superoxide dismutase copper chaperone activity (GO:0016532);; Biological Process: removal of superoxide radicals (GO:0019430);; Biological Process: metal ion transport (GO:0030001);; Biological Process: posit…	K04569|2.74934e-179|mtr:MTR_4g101820|K04569 copper chaperone for superoxide dismutase | (RefSeq) Cu/Zn-superoxide dismutase copper chaperone	--	[P]	Inorganic ion transport and metabolism	Copper/zinc superoxide dismutase (SODC);; Heavy-metal-associated domain	Copper chaperone for superoxide dismutase, chloroplastic/cytosolic (Precursor) GN=CCS OS=Arabidopsis thaliana (Mouse-ear cress) PE=1 SV=1	S	Function unknown	Cu/Zn-superoxide dismutase copper chaperone [Medicago truncatula]
F01_transcript/15158	338	301	352	209	176	148	27.38	24.32	28.27	14.22	14.71	12.36	7.05e-11	-1.03052	down	[O]	Posttranslational modification, protein turnover, chaperones	Molecular Function: copper ion binding (GO:0005507);; Molecular Function: ATP binding (GO:0005524);; Cellular Component: mitochondrial matrix (GO:0005759);; Biological Process: response to unfolded protein (GO:0006986);; Cellular Component: chloroplast thylakoid membrane (GO:0009535);; Cellular Component: chloroplast stroma (GO:0009570);; Cellular Component: chloroplast envelope (GO:0009941);; Ce…	K04078|7.93534e-163|cam:101498320|K04078 chaperonin GroES | (RefSeq) 20 kDa chaperonin, chloroplastic-like	--	[O]	Posttranslational modification, protein turnover, chaperones	Chaperonin 10 Kd subunit	20 kDa chaperonin, chloroplastic (Precursor) GN=T1M15.120 OS=Arabidopsis thaliana (Mouse-ear cress) PE=1 SV=2	O	Posttranslational modification, protein turnover, chaperones	GroES chaperonin [Medicago truncatula]
F01_transcript/16234	3125	3267	3305	1362	906	1132	314.76	328.12	329.4	114.83	94.64	118.33	1.18e-82	-1.64401	down	[P]	Inorganic ion transport and metabolism	Molecular Function: superoxide dismutase activity (GO:0004784);; Molecular Function: copper ion binding (GO:0005507);; Molecular Function: zinc ion binding (GO:0008270);; Cellular Component: chloroplast stroma (GO:0009570);; Cellular Component: thylakoid (GO:0009579);; Biological Process: removal of superoxide radicals (GO:0019430);; Cellular Component: apoplast (GO:0048046);; Biological Process:…	K04565|5.55458e-129|mtr:MTR_4g057240|K04565 superoxide dismutase, Cu-Zn family [EC:1.15.1.1] | (RefSeq) superoxide dismutase [Cu-Zn] protein	ko04146:Peroxisome	[P]	Inorganic ion transport and metabolism	Copper/zinc superoxide dismutase (SODC)	Superoxide dismutase [Cu-Zn], chloroplastic (Precursor) GN=SODCP OS=Medicago sativa (Alfalfa) PE=2 SV=1	P	Inorganic ion transport and metabolism	unknown [Medicago truncatula]
F01_transcript/13427	1043	1293	1332	489	431	559	64.2	79.41	81.1	25.17	27.23	35.26	2.53e-26	-1.42001	down	--	--	Cellular Component: nucleus (GO:0005634);; Biological Process: response to oxidative stress (GO:0006979);; Cellular Component: chloroplast thylakoid membrane (GO:0009535);; Cellular Component: chloroplast thylakoid lumen (GO:0009543);; Molecular Function: L-ascorbate peroxidase activity (GO:0016688);; Molecular Function: heme binding (GO:0020037);; Biological Process: oxidation-reduction process …	K00434|0|mtr:MTR_5g064610|K00434 L-ascorbate peroxidase [EC:1.11.1.11] | (RefSeq) thylakoid lumenal 29 kDa protein	ko00053:Ascorbate and aldarate metabolism;ko00480:Glutathione metabolism	--	--	Peroxidase	Thylakoid lumenal 29 kDa protein, chloroplastic (Precursor) GN=CLEB3J9 OS=Solanum lycopersicum (Tomato) PE=3 SV=1	S	Function unknown	hypothetical protein MTR_5g064610 [Medicago truncatula]
F01_transcript/19464	154	124	149	469	390	292	25.06	20.17	24.08	64.04	66.86	50.3	4.48e-10	1.2876	up	--	--	Cellular Component: nucleus (GO:0005634);; Biological Process: response to oxidative stress (GO:0006979);; Cellular Component: chloroplast thylakoid membrane (GO:0009535);; Cellular Component: chloroplast thylakoid lumen (GO:0009543);; Molecular Function: L-ascorbate peroxidase activity (GO:0016688);; Molecular Function: heme binding (GO:0020037);; Biological Process: oxidation-reduction process …	K00434|4.70451e-95|mtr:MTR_5g064610|K00434 L-ascorbate peroxidase [EC:1.11.1.11] | (RefSeq) thylakoid lumenal 29 kDa protein	ko00053:Ascorbate and aldarate metabolism;ko00480:Glutathione metabolism	--	--	Peroxidase	Thylakoid lumenal 29 kDa protein, chloroplastic (Precursor) GN=F23J3.40 OS=Arabidopsis thaliana (Mouse-ear cress) PE=1 SV=2	S	Function unknown	hypothetical protein MTR_5g064610 [Medicago truncatula]
C2_group	T13_Count	T14_Count	T15_Count	T16_Count	T17_Count	T18_Count	T13_FPKM	T14_FPKM	T15_FPKM	T16_FPKM	T17_FPKM	T18_FPKM	FDR	log2FC	regulated	COG_class	COG_class_annotation	GO_annotation	KEGG_annotation	KEGG_pathway	KOG_class	KOG_class_annotation	Pfam_annotation	Swissprot_annotation	eggNOG_class	eggNOG_class_annotation	nr_annotation
F01_transcript/15757	482	423	406	1459	1413	1256	44.66	43.49	39.83	133.97	118.39	119	3.8e-79	1.53355	up	[P]	Inorganic ion transport and metabolism	Molecular Function: superoxide dismutase activity (GO:0004784);; Cellular Component: mitochondrial matrix (GO:0005759);; Biological Process: removal of superoxide radicals (GO:0019430);; Molecular Function: metal ion binding (GO:0046872);; Biological Process: oxidation-reduction process (GO:0055114);;	K04564|4.3164e-144|cam:101514373|K04564 superoxide dismutase, Fe-Mn family [EC:1.15.1.1] | (RefSeq) superoxide dismutase [Mn], mitochondrial	ko04146:Peroxisome	[P]	Inorganic ion transport and metabolism	Iron/manganese superoxide dismutases, C-terminal domain;; Iron/manganese superoxide dismutases, alpha-hairpin domain	Superoxide dismutase [Mn], mitochondrial (Precursor) GN=SODA OS=Pisum sativum (Garden pea) PE=2 SV=2	P	Inorganic ion transport and metabolism	unknown [Medicago truncatula]
F01_transcript/15939	108	115	98	203	271	234	10.11	11.97	9.75	18.8	22.92	22.42	1.2e-09	1.0128	up	[O]	Posttranslational modification, protein turnover, chaperones	Molecular Function: copper ion binding (GO:0005507);; Molecular Function: ATP binding (GO:0005524);; Cellular Component: mitochondrial matrix (GO:0005759);; Biological Process: response to unfolded protein (GO:0006986);; Cellular Component: chloroplast thylakoid membrane (GO:0009535);; Cellular Component: chloroplast stroma (GO:0009570);; Cellular Component: chloroplast envelope (GO:0009941);; Ce…	K04078|6.1142e-162|cam:101498320|K04078 chaperonin GroES | (RefSeq) 20 kDa chaperonin, chloroplastic-like	--	[O]	Posttranslational modification, protein turnover, chaperones	Chaperonin 10 Kd subunit	20 kDa chaperonin, chloroplastic (Precursor) GN=T1M15.120 OS=Arabidopsis thaliana (Mouse-ear cress) PE=1 SV=2	O	Posttranslational modification, protein turnover, chaperones	GroES chaperonin [Medicago truncatula]
F01_transcript/15158	616	596	593	136	162	129	49.61	53.3	50.59	10.82	11.85	10.64	4.93e-78	-2.20683	down	[O]	Posttranslational modification, protein turnover, chaperones	Molecular Function: copper ion binding (GO:0005507);; Molecular Function: ATP binding (GO:0005524);; Cellular Component: mitochondrial matrix (GO:0005759);; Biological Process: response to unfolded protein (GO:0006986);; Cellular Component: chloroplast thylakoid membrane (GO:0009535);; Cellular Component: chloroplast stroma (GO:0009570);; Cellular Component: chloroplast envelope (GO:0009941);; Ce…	K04078|7.93534e-163|cam:101498320|K04078 chaperonin GroES | (RefSeq) 20 kDa chaperonin, chloroplastic-like	--	[O]	Posttranslational modification, protein turnover, chaperones	Chaperonin 10 Kd subunit	20 kDa chaperonin, chloroplastic (Precursor) GN=T1M15.120 OS=Arabidopsis thaliana (Mouse-ear cress) PE=1 SV=2	O	Posttranslational modification, protein turnover, chaperones	GroES chaperonin [Medicago truncatula]
C1_vs_C2	T01	T02	T03	T04	T05	T06	T13	T14	T15	T16	T17	T18	T01_T02_T03_vs_T04_T05_T06-FDR	T01_T02_T03_vs_T04_T05_T06-log2FC	T01_T02_T03_vs_T04_T05_T06-regulated	T13_T14_T15_vs_T16_T17_T18-FDR	T13_T14_T15_vs_T16_T17_T18-log2FC	T13_T14_T15_vs_T16_T17_T18-regulated	COG_class	COG_class_annotation	GO_annotation	KEGG_annotation	KEGG_pathway	KOG_class	KOG_class_annotation	Pfam_annotation	Swissprot_annotation	eggNOG_class	eggNOG_class_annotation	nr_annotation
F01_transcript/15757	95.99	119.41	103.29	40.46	42.82	34.58	44.66	43.49	39.83	133.97	118.39	119	5.64803e-54	-1.5082	down	3.79957e-79	1.53355	up	[P]	Inorganic ion transport and metabolism	Molecular Function: superoxide dismutase activity (GO:0004784);; Cellular Component: mitochondrial matrix (GO:0005759);; Biological Process: removal of superoxide radicals (GO:0019430);; Molecular Function: metal ion binding (GO:0046872);; Biological Process: oxidation-reduction process (GO:0055114);;	K04564|4.3164e-144|cam:101514373|K04564 superoxide dismutase, Fe-Mn family [EC:1.15.1.1] | (RefSeq) superoxide dismutase [Mn], mitochondrial	ko04146:Peroxisome	[P]	Inorganic ion transport and metabolism	Iron/manganese superoxide dismutases, C-terminal domain;; Iron/manganese superoxide dismutases, alpha-hairpin domain	Superoxide dismutase [Mn], mitochondrial (Precursor) GN=SODA OS=Pisum sativum (Garden pea) PE=2 SV=2	P	Inorganic ion transport and metabolism	unknown [Medicago truncatula]
F01_transcript/5143	6.14	8.55	7.51	23.67	25.81	23.56	18.93	19.54	21.25	3.05	3.21	3.52	2.24657e-54	1.67374	up	1.07622e-109	-2.6033	down	[VI]	--	Molecular Function: glutathione peroxidase activity (GO:0004602);; Biological Process: response to oxidative stress (GO:0006979);; Biological Process: oxidation-reduction process (GO:0055114);; Biological Process: cellular oxidant detoxification (GO:0098869);;	K00432|2.47436e-27|mtr:MTR_8g098410|K00432 glutathione peroxidase [EC:1.11.1.9] | (RefSeq) phospholipid hydroperoxide glutathione peroxidase	ko00480:Glutathione metabolism;ko00590:Arachidonic acid metabolism	[O]	Posttranslational modification, protein turnover, chaperones	Glutathione peroxidase;; Glutathione peroxidase	Probable phospholipid hydroperoxide glutathione peroxidase OS=Spinacia oleracea (Spinach) PE=2 SV=1	O	Posttranslational modification, protein turnover, chaperones	Glutathione peroxidase [Medicago truncatula]
F01_transcript/19462	20.72	15.99	17.87	89.76	76.37	91.45	16.26	15.63	20.32	35.64	41.84	49.23	5.33603e-27	2.11348	up	5.43542e-07	1.24307	up	[O]	Posttranslational modification, protein turnover, chaperones	Molecular Function: peroxidase activity (GO:0004601);; Cellular Component: mitochondrial matrix (GO:0005759);; Biological Process: response to oxidative stress (GO:0006979);; Molecular Function: peroxiredoxin activity (GO:0051920);; Biological Process: oxidation-reduction process (GO:0055114);; Biological Process: cellular oxidant detoxification (GO:0098869);;	--	--	[O]	Posttranslational modification, protein turnover, chaperones	Redoxin;; AhpC/TSA family	Peroxiredoxin-2F, mitochondrial (Precursor) GN=PRXIIF OS=Arabidopsis thaliana (Mouse-ear cress) PE=1 SV=2	O	Posttranslational modification, protein turnover, chaperones	unknown [Medicago truncatula]
